# Supplementary material
Source: publisher figshare collection journal article supplement (https://karger.figshare.com/articles/dataset/_/5091934)
Supplement: Supplementary file 1 [file 1]

**Table S2. CAZyme analysis of the proteome of *B. bruxellensis* LAMAP2480**

| ID              | CAZy family | e-value  |
|-----------------|-------------|----------|
| LAMAP2480_0152  | AA1         | 6.1e-79  |
| LAMAP2480_1001  | AA1         | 1.00E-89 |
| LAMAP2480_6361  | AA2         | 2.3e-52  |
| LAMAP2480_6478  | AA2         | 4.8e-37  |
| LAMAP2480_7713  | AA2         | 3.00E-52 |
| LAMAP2480_9171  | AA2         | 8.00E-37 |
| LAMAP2480_0827  | AA4         | 3.2e-21  |
| LAMAP2480_10127 | AA4         | 2.4e-23  |
| LAMAP2480_1951  | AA4         | 2.8e-24  |
| LAMAP2480_2555  | AA4         | 6.1e-25  |
| LAMAP2480_7956  | AA4         | 6.00E-24 |
| LAMAP2480_8041  | AA4         | 2.1e-25  |
| LAMAP2480_8302  | AA4         | 3.3e-20  |
| LAMAP2480_8309  | AA4         | 3.8e-24  |
| LAMAP2480_8440  | AA4         | 2.2e-20  |
| LAMAP2480_10153 | AA6         | 4.2e-77  |
| LAMAP2480_10175 | AA6         | 9.00E-66 |
| LAMAP2480_1721  | AA6         | 8.4e-76  |
| LAMAP2480_4133  | AA6         | 1.7e-77  |
| LAMAP2480_9932  | AA6         | 9.6e-81  |
| LAMAP2480_5077  | AA7         | 4.5e-19  |
| LAMAP2480_5784  | AA7         | 2.5e-19  |
| LAMAP2480_2957  | CBM1        | 1.6e-12  |
| LAMAP2480_3561  | CBM1        | 5.2e-12  |
| LAMAP2480_10581 | CBM21       | 8.8e-18  |
| LAMAP2480_10583 | CBM21       | 4.00E-26 |
| LAMAP2480_10319 | CBM32       | 1.00E-05 |
| LAMAP2480_1254  | CBM32       | 7.5e-08  |
| LAMAP2480_12116 | CBM43       | 4.9e-21  |
| LAMAP2480_7884  | CBM43       | 1.8e-20  |
| LAMAP2480_7941  | CBM43       | 2.1e-20  |
| LAMAP2480_0443  | CBM48       | 1.1e-05  |
| LAMAP2480_10579 | CBM48       | 9.1e-06  |
| LAMAP2480_8767  | CBM48       | 4.2e-08  |
| LAMAP2480_8985  | CBM48       | 8.8e-06  |
| LAMAP2480_8998  | CBM48       | 8.8e-06  |
| LAMAP2480_0249  | CE1         | 4.6e-51  |
| LAMAP2480_0821  | CE1         | 0.00052  |
| LAMAP2480_0973  | CE1         | 6.2e-16  |
| LAMAP2480_1584  | CE1         | 1.5e-40  |
| LAMAP2480_1983  | CE1         | 9.9e-05  |
| LAMAP2480_3388  | CE1         | 1.2e-06  |
| LAMAP2480_4313  | CE1         | 8.1e-05  |
| LAMAP2480_4712  | CE1         | 3.7e-05  |
| LAMAP2480_4753  | CE1         | 3.4e-07  |
| LAMAP2480_4976  | CE1         | 9.4e-41  |
| LAMAP2480_5124  | CE1         | 3.7e-08  |
| LAMAP2480_5145  | CE1         | 5.9e-11  |
| LAMAP2480_5379  | CE1         | 5.4e-51  |
| LAMAP2480_5417  | CE1         | 9.5e-05  |
| LAMAP2480_5447  | CE1         | 2.7e-12  |

|                 |       |          |
|-----------------|-------|----------|
| LAMAP2480_6045  | CE1   | 1.4e-05  |
| LAMAP2480_6897  | CE1   | 1.2e-09  |
| LAMAP2480_6898  | CE1   | 1.2e-09  |
| LAMAP2480_7374  | CE1   | 2.4e-41  |
| LAMAP2480_7376  | CE1   | 3.8e-41  |
| LAMAP2480_7731  | CE1   | 2.6e-12  |
| LAMAP2480_9543  | CE1   | 3.4e-40  |
| LAMAP2480_9572  | CE1   | 9.6e-41  |
| LAMAP2480_10354 | CE12  | 1.4e-07  |
| LAMAP2480_10358 | CE12  | 1.3e-07  |
| LAMAP2480_2115  | CE12  | 1.3e-07  |
| LAMAP2480_2116  | CE12  | 3.1e-09  |
| LAMAP2480_12275 | CE14  | 1.1e-06  |
| LAMAP2480_2910  | CE14  | 2.6e-12  |
| LAMAP2480_10550 | CE4   | 1.9e-24  |
| LAMAP2480_11318 | CE4   | 2.9e-11  |
| LAMAP2480_7986  | CE4   | 1.9e-24  |
| LAMAP2480_3351  | CE9   | 1.4e-111 |
| LAMAP2480_4786  | CE9   | 4.7e-110 |
| LAMAP2480_1354  | GH109 | 1.4e-08  |
| LAMAP2480_8401  | GH109 | 3.7e-08  |
| LAMAP2480_8783  | GH109 | 2.6e-08  |
| LAMAP2480_3731  | GH125 | 4.1e-152 |
| LAMAP2480_6542  | GH125 | 6.8e-93  |
| LAMAP2480_10604 | GH13  | 8.4e-56  |
| LAMAP2480_1202  | GH13  | 4.8e-66  |
| LAMAP2480_6923  | GH13  | 5.3e-71  |
| LAMAP2480_7753  | GH13  | 7.9e-66  |
| LAMAP2480_0298  | GH132 | 4.1e-133 |
| LAMAP2480_2409  | GH132 | 6.3e-91  |
| LAMAP2480_2992  | GH132 | 3.7e-125 |
| LAMAP2480_4692  | GH132 | 6.4e-133 |
| LAMAP2480_6784  | GH132 | 2.9e-105 |
| LAMAP2480_9235  | GH132 | 1.3e-90  |
| LAMAP2480_11478 | GH15  | 1.2e-52  |
| LAMAP2480_0092  | GH16  | 9.00E-24 |
| LAMAP2480_2647  | GH16  | 6.1e-26  |
| LAMAP2480_4220  | GH16  | 1.9e-15  |
| LAMAP2480_5286  | GH16  | 9.5e-26  |
| LAMAP2480_0542  | GH17  | 6.4e-47  |
| LAMAP2480_11468 | GH17  | 4.8e-19  |
| LAMAP2480_12117 | GH17  | 1.4e-10  |
| LAMAP2480_12121 | GH17  | 4.4e-11  |
| LAMAP2480_12356 | GH17  | 1.00E-17 |
| LAMAP2480_1707  | GH17  | 9.00E-12 |
| LAMAP2480_2842  | GH17  | 7.3e-46  |
| LAMAP2480_4728  | GH17  | 8.4e-20  |
| LAMAP2480_5227  | GH17  | 1.3e-11  |
| LAMAP2480_5227  | GH17  | 1.5e-16  |
| LAMAP2480_6270  | GH17  | 1.4e-19  |
| LAMAP2480_8476  | GH17  | 2.6e-23  |
| LAMAP2480_0984  | GH18  | 4.5e-22  |
| LAMAP2480_1030  | GH18  | 4.1e-11  |

|                 |      |           |
|-----------------|------|-----------|
| LAMAP2480_10757 | GH18 | 2.3e-55   |
| LAMAP2480_1974  | GH18 | 7.1e-23   |
| LAMAP2480_5329  | GH18 | 1.3e-10   |
| LAMAP2480_6153  | GH18 | 5.3e-57   |
| LAMAP2480_1198  | GH2  | 3.9e-187  |
| LAMAP2480_5083  | GH2  | 4.00E-78  |
| LAMAP2480_5793  | GH2  | 1.8e-77   |
| LAMAP2480_6925  | GH3  | 4.00E-60  |
| LAMAP2480_7421  | GH3  | 1.2e-61   |
| LAMAP2480_9661  | GH3  | 2.6e-49   |
| LAMAP2480_9669  | GH3  | 8.4e-49   |
| LAMAP2480_0201  | GH31 | 5.2e-145  |
| LAMAP2480_3437  | GH31 | 4.3e-92   |
| LAMAP2480_6506  | GH32 | 3.5e-85   |
| LAMAP2480_11765 | GH37 | 2.7e-58   |
| LAMAP2480_2465  | GH37 | 3.4e-147  |
| LAMAP2480_9827  | GH37 | 1.00E-77  |
| LAMAP2480_9829  | GH37 | 6.4e-78   |
| LAMAP2480_2993  | GH38 | 1.9e-08   |
| LAMAP2480_9537  | GH38 | 1.7e-14   |
| LAMAP2480_1149  | GH47 | 1.2e-155  |
| LAMAP2480_1897  | GH47 | 8.3e-118  |
| LAMAP2480_5751  | GH47 | 5.6e-154  |
| LAMAP2480_6756  | GH47 | 3.4e-59   |
| LAMAP2480_6992  | GH47 | 5.1e-59   |
| LAMAP2480_8686  | GH47 | 7.5e-155  |
| LAMAP2480_0616  | GH5  | 3.7e-28   |
| LAMAP2480_1731  | GH5  | 3.7e-44   |
| LAMAP2480_2526  | GH5  | 1.00E-43  |
| LAMAP2480_7429  | GH5  | 7.2e-22   |
| LAMAP2480_7522  | GH5  | 4.3e-54   |
| LAMAP2480_8609  | GH5  | 8.00E-44  |
| LAMAP2480_9295  | GH5  | 2.1e-25   |
| LAMAP2480_9297  | GH5  | 5.8e-25   |
| LAMAP2480_7158  | GH63 | 3.9e-34   |
| LAMAP2480_7752  | GH63 | 1.1e-32   |
| LAMAP2480_8102  | GH63 | 2.6e-17   |
| LAMAP2480_8657  | GH63 | 3.9e-34   |
| LAMAP2480_1254  | GH65 | 2.6e-84   |
| LAMAP2480_0668  | GH72 | 3.9e-123  |
| LAMAP2480_0766  | GH72 | 3.1e-127  |
| LAMAP2480_10384 | GH72 | 1.00E-132 |
| LAMAP2480_10441 | GH72 | 3.7e-84   |
| LAMAP2480_10720 | GH72 | 2.00E-100 |
| LAMAP2480_10743 | GH72 | 4.00E-100 |
| LAMAP2480_2708  | GH72 | 1.1e-132  |
| LAMAP2480_7884  | GH72 | 1.7e-123  |
| LAMAP2480_7941  | GH72 | 1.1e-137  |
| LAMAP2480_9490  | GH72 | 1.3e-121  |
| LAMAP2480_7086  | GH74 | 2.00E-05  |
| LAMAP2480_7086  | GH74 | 1.8e-06   |
| LAMAP2480_7087  | GH74 | 0.00028   |
| LAMAP2480_7572  | GH74 | 4.4e-05   |

|                 |      |          |
|-----------------|------|----------|
| LAMAP2480_7572  | GH74 | 1.7e-06  |
| LAMAP2480_7573  | GH74 | 0.00034  |
| LAMAP2480_9130  | GH74 | 3.5e-09  |
| LAMAP2480_9132  | GH74 | 2.3e-10  |
| LAMAP2480_0282  | GH76 | 1.7e-102 |
| LAMAP2480_4315  | GH76 | 4.4e-102 |
| LAMAP2480_4673  | GH76 | 4.5e-82  |
| LAMAP2480_5952  | GH76 | 8.1e-102 |
| LAMAP2480_0059  | GH81 | 1.3e-209 |
| LAMAP2480_0278  | GH81 | 4.1e-198 |
| LAMAP2480_3683  | GH81 | 2.8e-209 |
| LAMAP2480_4667  | GH81 | 3.5e-201 |
| LAMAP2480_7794  | GH85 | 4.8e-68  |
| LAMAP2480_0834  | GT1  | 3.00E-40 |
| LAMAP2480_4053  | GT1  | 1.4e-51  |
| LAMAP2480_10719 | GT15 | 5.2e-106 |
| LAMAP2480_1366  | GT15 | 1.4e-112 |
| LAMAP2480_1461  | GT15 | 3.7e-103 |
| LAMAP2480_2406  | GT15 | 6.5e-114 |
| LAMAP2480_2641  | GT15 | 6.00E-54 |
| LAMAP2480_2871  | GT15 | 1.5e-116 |
| LAMAP2480_4275  | GT15 | 2.2e-103 |
| LAMAP2480_4805  | GT15 | 9.6e-111 |
| LAMAP2480_5280  | GT15 | 1.1e-53  |
| LAMAP2480_6672  | GT15 | 7.8e-57  |
| LAMAP2480_7347  | GT15 | 9.5e-128 |
| LAMAP2480_7503  | GT15 | 8.7e-115 |
| LAMAP2480_8791  | GT15 | 3.6e-80  |
| LAMAP2480_8794  | GT15 | 6.3e-80  |
| LAMAP2480_9916  | GT15 | 1.3e-113 |
| LAMAP2480_9920  | GT15 | 2.3e-113 |
| LAMAP2480_0634  | GT2  | 6.6e-35  |
| LAMAP2480_1022  | GT2  | 6.5e-15  |
| LAMAP2480_10978 | GT2  | 1.7e-36  |
| LAMAP2480_1630  | GT2  | 1.2e-43  |
| LAMAP2480_2127  | GT2  | 0.00049  |
| LAMAP2480_4018  | GT2  | 2.2e-05  |
| LAMAP2480_5527  | GT2  | 2.2e-05  |
| LAMAP2480_5796  | GT2  | 7.1e-35  |
| LAMAP2480_6287  | GT2  | 0.00012  |
| LAMAP2480_7171  | GT2  | 0.00028  |
| LAMAP2480_8641  | GT2  | 3.00E-15 |
| LAMAP2480_0403  | GT20 | 5.4e-147 |
| LAMAP2480_0414  | GT20 | 1.1e-143 |
| LAMAP2480_5804  | GT20 | 5.2e-143 |
| LAMAP2480_5863  | GT20 | 6.1e-193 |
| LAMAP2480_7289  | GT20 | 5.2e-184 |
| LAMAP2480_8410  | GT20 | 3.00E-69 |
| LAMAP2480_8410  | GT20 | 1.5e-59  |
| LAMAP2480_3260  | GT21 | 4.7e-86  |
| LAMAP2480_3864  | GT21 | 1.3e-91  |
| LAMAP2480_3006  | GT22 | 1.1e-81  |
| LAMAP2480_6792  | GT22 | 2.5e-45  |

|                 |      |          |
|-----------------|------|----------|
| LAMAP2480_11605 | GT24 | 1.1e-118 |
| LAMAP2480_2934  | GT24 | 7.1e-128 |
| LAMAP2480_3174  | GT28 | 1.8e-08  |
| LAMAP2480_5179  | GT3  | 1.4e-296 |
| LAMAP2480_5358  | GT3  | 2.7e-296 |
| LAMAP2480_11018 | GT32 | 9.9e-21  |
| LAMAP2480_11020 | GT32 | 5.1e-20  |
| LAMAP2480_1286  | GT32 | 1.4e-21  |
| LAMAP2480_2567  | GT32 | 3.3e-23  |
| LAMAP2480_4541  | GT32 | 1.6e-12  |
| LAMAP2480_5118  | GT32 | 4.7e-12  |
| LAMAP2480_5842  | GT32 | 1.4e-21  |
| LAMAP2480_7517  | GT32 | 1.4e-21  |
| LAMAP2480_9957  | GT32 | 4.9e-23  |
| LAMAP2480_0741  | GT33 | 1.4e-126 |
| LAMAP2480_10272 | GT33 | 5.9e-128 |
| LAMAP2480_2877  | GT34 | 1.8e-62  |
| LAMAP2480_4610  | GT34 | 1.3e-80  |
| LAMAP2480_6668  | GT34 | 7.8e-63  |
| LAMAP2480_7240  | GT34 | 1.3e-80  |
| LAMAP2480_3261  | GT35 | 1.8e-277 |
| LAMAP2480_3862  | GT35 | 3.7e-277 |
| LAMAP2480_1281  | GT39 | 1.4e-75  |
| LAMAP2480_1902  | GT39 | 1.00E-70 |
| LAMAP2480_2733  | GT39 | 1.8e-47  |
| LAMAP2480_6759  | GT39 | 4.00E-37 |
| LAMAP2480_6995  | GT39 | 4.9e-37  |
| LAMAP2480_7038  | GT39 | 1.2e-45  |
| LAMAP2480_9184  | GT39 | 7.4e-24  |
| LAMAP2480_9419  | GT39 | 9.1e-30  |
| LAMAP2480_0179  | GT4  | 8.6e-28  |
| LAMAP2480_0627  | GT4  | 4.8e-20  |
| LAMAP2480_1492  | GT4  | 1.1e-35  |
| LAMAP2480_3459  | GT4  | 9.5e-28  |
| LAMAP2480_5800  | GT4  | 2.00E-21 |
| LAMAP2480_8898  | GT4  | 5.00E-36 |
| LAMAP2480_1885  | GT48 | 0        |
| LAMAP2480_2039  | GT48 | 2.5e-279 |
| LAMAP2480_7301  | GT48 | 0        |
| LAMAP2480_7988  | GT48 | 1.6e-206 |
| LAMAP2480_8786  | GT48 | 0        |
| LAMAP2480_8107  | GT57 | 1.00E-69 |
| LAMAP2480_8335  | GT57 | 8.8e-70  |
| LAMAP2480_5910  | GT59 | 4.2e-111 |
| LAMAP2480_6028  | GT59 | 4.8e-110 |
| LAMAP2480_0750  | GT62 | 5.7e-110 |
| LAMAP2480_0844  | GT62 | 3.5e-126 |
| LAMAP2480_10144 | GT62 | 5.8e-113 |
| LAMAP2480_10146 | GT62 | 7.3e-112 |
| LAMAP2480_11385 | GT62 | 1.8e-98  |
| LAMAP2480_4039  | GT62 | 3.5e-126 |
| LAMAP2480_5595  | GT62 | 1.8e-98  |
| LAMAP2480_0867  | GT66 | 3.4e-183 |

|                 |      |          |
|-----------------|------|----------|
| LAMAP2480_10555 | GT66 | 2.6e-104 |
| LAMAP2480_1397  | GT71 | 8.7e-74  |
| LAMAP2480_1463  | GT71 | 5.4e-86  |
| LAMAP2480_2649  | GT71 | 4.6e-57  |
| LAMAP2480_5289  | GT71 | 4.8e-57  |
| LAMAP2480_5703  | GT71 | 1.3e-73  |
| LAMAP2480_5753  | GT71 | 2.00E-28 |
| LAMAP2480_10655 | GT8  | 1.2e-39  |
| LAMAP2480_1746  | GT8  | 2.8e-13  |
| LAMAP2480_1799  | GT8  | 7.8e-47  |
| LAMAP2480_5637  | GT8  | 1.4e-33  |
| LAMAP2480_9116  | GT8  | 1.3e-13  |
| LAMAP2480_9506  | GT8  | 1.1e-32  |
| LAMAP2480_9602  | GT83 | 6.6e-06  |
| LAMAP2480_0851  | GT91 | 7.1e-97  |
| LAMAP2480_3158  | GT91 | 2.3e-100 |
| LAMAP2480_3159  | GT91 | 6.6e-97  |
| LAMAP2480_3160  | GT91 | 1.6e-94  |
| LAMAP2480_3399  | GT91 | 6.3e-96  |
| LAMAP2480_4061  | GT91 | 1.1e-84  |
| LAMAP2480_4167  | GT91 | 1.4e-99  |
| LAMAP2480_4168  | GT91 | 3.8e-98  |
| LAMAP2480_4169  | GT91 | 1.00E-91 |
| LAMAP2480_4170  | GT91 | 1.6e-91  |
| LAMAP2480_4743  | GT91 | 3.00E-96 |
| LAMAP2480_6897  | PL22 | 0.00054  |
| LAMAP2480_6898  | PL22 | 0.00035  |

) using dbCAN.
