# Supplementary material
Source: publisher figshare collection journal article supplement (https://karger.figshare.com/articles/dataset/_/5091934)
Supplement: Supplementary file 3 [file 1]

**Table S4. Putative stress related proteins c**

|                      |
|----------------------|
| LAMAP LAMAP2480_0009 |
| LAMAP LAMAP2480_0119 |
| LAMAP LAMAP2480_0131 |
| LAMAP LAMAP2480_0152 |
| LAMAP LAMAP2480_0205 |
| LAMAP LAMAP2480_0267 |
| LAMAP LAMAP2480_0403 |
| LAMAP LAMAP2480_0441 |
| LAMAP LAMAP2480_0745 |
| LAMAP LAMAP2480_0764 |
| LAMAP LAMAP2480_1038 |
| LAMAP LAMAP2480_1096 |
| LAMAP LAMAP2480_1201 |
| LAMAP LAMAP2480_1401 |
| LAMAP LAMAP2480_1434 |
| LAMAP LAMAP2480_1468 |
| LAMAP LAMAP2480_1674 |
| LAMAP LAMAP2480_1857 |
| LAMAP LAMAP2480_2045 |
| LAMAP LAMAP2480_2063 |
| LAMAP LAMAP2480_2069 |
| LAMAP LAMAP2480_2070 |

|       |                |
|-------|----------------|
| LAMAP | LAMAP2480_2077 |
| LAMAP | LAMAP2480_2373 |
| LAMAP | LAMAP2480_2453 |
| LAMAP | LAMAP2480_2663 |
| LAMAP | LAMAP2480_3126 |
| LAMAP | LAMAP2480_3150 |
| LAMAP | LAMAP2480_3350 |
| LAMAP | LAMAP2480_3357 |
| LAMAP | LAMAP2480_3440 |
| LAMAP | LAMAP2480_3603 |
| LAMAP | LAMAP2480_3757 |
| LAMAP | LAMAP2480_3972 |
| LAMAP | LAMAP2480_4090 |
| LAMAP | LAMAP2480_4336 |
| LAMAP | LAMAP2480_4338 |
| LAMAP | LAMAP2480_4879 |
| LAMAP | LAMAP2480_4890 |
| LAMAP | LAMAP2480_5022 |
| LAMAP | LAMAP2480_5966 |
| LAMAP | LAMAP2480_6106 |
| LAMAP | LAMAP2480_6178 |
| LAMAP | LAMAP2480_6448 |
| LAMAP | LAMAP2480_6504 |
| LAMAP | LAMAP2480_6505 |
| LAMAP | LAMAP2480_6507 |
| LAMAP | LAMAP2480_6563 |
| LAMAP | LAMAP2480_6691 |

|                      |
|----------------------|
|                      |
| LAMAP LAMAP2480_6814 |
| LAMAP LAMAP2480_6917 |
| LAMAP LAMAP2480_6926 |
| LAMAP LAMAP2480_7125 |
| LAMAP LAMAP2480_7420 |
| LAMAP LAMAP2480_7421 |
| LAMAP LAMAP2480_7422 |
| LAMAP LAMAP2480_7464 |
| LAMAP LAMAP2480_7482 |
|                      |
| LAMAP LAMAP2480_7504 |
|                      |
| LAMAP LAMAP2480_7551 |
| LAMAP LAMAP2480_7674 |
| LAMAP LAMAP2480_7820 |
|                      |
| LAMAP LAMAP2480_8061 |
|                      |
| LAMAP LAMAP2480_8135 |
|                      |
| LAMAP LAMAP2480_8309 |
|                      |
| LAMAP LAMAP2480_8380 |
|                      |
| LAMAP LAMAP2480_8438 |
| LAMAP LAMAP2480_8609 |
| LAMAP LAMAP2480_8695 |
| LAMAP LAMAP2480_9065 |
| LAMAP LAMAP2480_9100 |
| LAMAP LAMAP2480_9123 |
| LAMAP LAMAP2480_9334 |
| LAMAP LAMAP2480_9676 |
|                      |
| LAMAP LAMAP2480_9797 |
| LAMAP LAMAP2480_9845 |

|       |                 |
|-------|-----------------|
| LAMAP | LAMAP2480_10006 |
| LAMAP | LAMAP2480_10082 |

## onserved in Brettanomyces strains

|                                                                                                                                                                                                                                                                                                                                                                                                                                                                         |
|-------------------------------------------------------------------------------------------------------------------------------------------------------------------------------------------------------------------------------------------------------------------------------------------------------------------------------------------------------------------------------------------------------------------------------------------------------------------------|
| vacuolar protein sorting-associated protein 16 homolog                                                                                                                                                                                                                                                                                                                                                                                                                  |
| proton symporter of the plasma membrane, subject to glucose-induced inactivation, strongly but transiently induced when cells are subjected to osmotic shock                                                                                                                                                                                                                                                                                                            |
| of the Sec1p/Munc-18 family, essential for vacuolar protein sorting; required for the function of Pep12p and the early endosome/late Golgi SNARE Tlg2p; essential for fusion of Golgi-derived vesicles with the prevacuolar compartment                                                                                                                                                                                                                                 |
| oxidase, integral membrane protein with similarity to Fet3p; may have a role in iron transport                                                                                                                                                                                                                                                                                                                                                                          |
| fusion and transport protein UGO1                                                                                                                                                                                                                                                                                                                                                                                                                                       |
| repair protein RAD57                                                                                                                                                                                                                                                                                                                                                                                                                                                    |
| subunit of the trehalose-6-phosphate synthase/phosphatase complex, which synthesizes the storage carbohydrate trehalose; expression is induced by stress conditions and repressed by the Ras-cAMP pathway                                                                                                                                                                                                                                                               |
| starvation modulator protein 1                                                                                                                                                                                                                                                                                                                                                                                                                                          |
| oxide oxidoreductase, flavohemoglobin involved in nitric oxide detoxification; plays a role in the oxidative and nitrosative stress responses                                                                                                                                                                                                                                                                                                                           |
| protein of unknown function; expression repressed by inosine and choline in an Opi1p-dependent manner; expression induced by mild heat-stress on a non-fermentable carbon                                                                                                                                                                                                                                                                                               |
| and cobalt transport protein CorA                                                                                                                                                                                                                                                                                                                                                                                                                                       |
| fumarate reductase, required with isoenzyme Osm1p for anaerobic growth; may interact with ribosomes, based on co-purification experiments; authentic, non-tagged protein is detected in purified mitochondria in high-throughput studies                                                                                                                                                                                                                                |
| transporter                                                                                                                                                                                                                                                                                                                                                                                                                                                             |
| resistance MFS transporter, drug:H <sup>+</sup> antiporter-2 (14 Spanner) (DHA2) family                                                                                                                                                                                                                                                                                                                                                                                 |
| b2 (L-lactate cytochrome-c oxidoreductase), component of the mitochondrial intermembrane space, required for lactate utilization; expression is repressed by glucose and anaerobic conditions                                                                                                                                                                                                                                                                           |
| permease, required for high-affinity transport of proline; also transports the toxic proline analog azetidine-2-carboxylate (AzC); PUT4 transcription is repressed in ammonia-grown cells                                                                                                                                                                                                                                                                               |
| resistance MFS transporter, drug:H <sup>+</sup> antiporter-2 (14 Spanner) (DHA2) family                                                                                                                                                                                                                                                                                                                                                                                 |
| symporter of the plasma membrane; transport activity is dependent on the pH gradient across the membrane; mediates high-affinity uptake of carbon sources lactate, pyruvate, and acetate, and also of the micronutrient selenite, whose structure mimics that of monocarboxylates; expression and localization are tightly regulated, with transcription repression, mRNA degradation, and protein endocytosis and degradation all occurring in the presence of glucose |
| transporter, sugar porter (SP) family                                                                                                                                                                                                                                                                                                                                                                                                                                   |
| solute:sodium symporter (SSS) family                                                                                                                                                                                                                                                                                                                                                                                                                                    |
| zinc transporter                                                                                                                                                                                                                                                                                                                                                                                                                                                        |
| secreted protein                                                                                                                                                                                                                                                                                                                                                                                                                                                        |

|                                                                                                                                                                                                                                                                                                                                     |
|-------------------------------------------------------------------------------------------------------------------------------------------------------------------------------------------------------------------------------------------------------------------------------------------------------------------------------------|
| transporter, sugar porter (SP) family                                                                                                                                                                                                                                                                                               |
| alpha of assimilatory sulfite reductase, which converts sulfite into sulfide                                                                                                                                                                                                                                                        |
| shock protein 26                                                                                                                                                                                                                                                                                                                    |
| xylose and arabinose reductase; member of the aldo-keto reductase (AKR) family; GFP-fusion protein is induced in response to the DNA-damaging agent MMS                                                                                                                                                                             |
| transporter ESBP6                                                                                                                                                                                                                                                                                                                   |
| permease, mediates purine (adenine, guanine, and hypoxanthine) and cytosine accumulation                                                                                                                                                                                                                                            |
| nicotinic acid transporter                                                                                                                                                                                                                                                                                                          |
| transporter AQR1                                                                                                                                                                                                                                                                                                                    |
| with a potential role in cell survival pathways, required for the diauxic growth shift; expression in mammalian cells increases survival under conditions inducing apoptosis; mutant has increased aneuploidy tolerance                                                                                                             |
| membrane H <sup>+</sup> -pantothenate symporter; confers sensitivity to the antifungal agent fenpropimorph                                                                                                                                                                                                                          |
| of the multi-drug and toxin extrusion (MATE) family of the multidrug/oligosaccharidyl-lipid/polysaccharide (MOP) exporter superfamily; overproduction confers ethionine resistance and accumulation of S-adenosylmethionine                                                                                                         |
| osmotic stress response (OSM) domain                                                                                                                                                                                                                                                                                                |
| nucleoside permease                                                                                                                                                                                                                                                                                                                 |
| shock factor protein                                                                                                                                                                                                                                                                                                                |
| transporter ESBP6                                                                                                                                                                                                                                                                                                                   |
| carboxypeptidase yscS; expression is induced under low-nitrogen conditions                                                                                                                                                                                                                                                          |
| transporter ESBP6                                                                                                                                                                                                                                                                                                                   |
| membrane antiporter with Ca <sup>2+</sup> /H <sup>+</sup> and K <sup>+</sup> /H <sup>+</sup> exchange activity, involved in control of cytosolic Ca <sup>2+</sup> and K <sup>+</sup> concentrations; has similarity to sodium/calcium exchangers, including the bovine Na <sup>+</sup> /Ca <sup>2+</sup> ,K <sup>+</sup> antiporter |
| symporter                                                                                                                                                                                                                                                                                                                           |
| sulfate permease; physically interacts with Hsp82p; green fluorescent protein (GFP)-fusion protein localizes to the ER; YPR003C is not an essential gene                                                                                                                                                                            |
| transporter                                                                                                                                                                                                                                                                                                                         |
| transporter C757.13                                                                                                                                                                                                                                                                                                                 |
| nucleoside transporter family                                                                                                                                                                                                                                                                                                       |
| permease, transports maltose, maltotriose, alpha-methylglucoside, and turanose; identical to Mph3p; encoded in a subtelomeric position in a region likely to have undergone duplication                                                                                                                                             |
| transporter, sugar porter (SP) family                                                                                                                                                                                                                                                                                               |
| malate dehydrogenase, catalyzes interconversion of malate and oxaloacetate; involved in the tricarboxylic acid (TCA) cycle; phosphorylated                                                                                                                                                                                          |
| transport protein SEC20                                                                                                                                                                                                                                                                                                             |

|                                                                                                                                                                                                                                         |
|-----------------------------------------------------------------------------------------------------------------------------------------------------------------------------------------------------------------------------------------|
| membrane riboflavin transporter; facilitates the uptake of vitamin B2; required for FAD-dependent processes; sequence similarity to mammalian monocarboxylate permeases, however mutants are not deficient in monocarboxylate transport |
| resistance MFS transporter, drug:H <sup>+</sup> antiporter-2 (14 Spanner) (DHA2) family                                                                                                                                                 |
| transporter, sugar porter (SP) family                                                                                                                                                                                                   |
| MFS-type transporter C1683.03c                                                                                                                                                                                                          |
| nucleoside transporter family                                                                                                                                                                                                           |
| beta-glucosidase I                                                                                                                                                                                                                      |
| transporter C36.03c                                                                                                                                                                                                                     |
| endopeptidase ctsD                                                                                                                                                                                                                      |
| and cobalt transport protein CorA                                                                                                                                                                                                       |
| membrane zinc transporter, transports zinc from the cytosol into the vacuole for storage; also has a role in resistance to zinc shock resulting from a sudden influx of zinc into the                                                   |
| metal ion transporter involved in manganese homeostasis; has broad specificity for di-valent and tri-valent metals; post-translationally regulated by levels of metal ions; member of the Nramp family of metal transport proteins      |
| ABC transporter                                                                                                                                                                                                                         |
| uptake protein, Trk family                                                                                                                                                                                                              |
| converts D-xylulose and ATP to xylulose 5-phosphate and ADP; rate limiting step in fermentation of xylulose; required for xylose fermentation by recombinant <i>S. cerevisiae</i> strains                                               |
| integral membrane protein required for efflux of amino acids during autophagic body breakdown in the vacuole; null mutation causes a gradual loss of viability during starvation                                                        |
| dehydrogenase, oxidizes D-lactate to pyruvate, transcription is heme-dependent, repressed by glucose, and derepressed in ethanol or lactate; located in the mitochondrial inner                                                         |
| protein of unknown function, member of the multi-drug and toxin extrusion (MATE) family of the multidrug/oligosaccharidyl-lipid/polysaccharide (MOP) exporter superfamily                                                               |
| protein kinase; may play a role in stress response, many CA <sup>++</sup> /calmodulin dependent phosphorylation substrates demonstrated in vitro, amino acid sequence similar to Cmk1p and mammalian Cam Kinase II                      |
| exo-1,3-beta-glucanase; contributes to ascospore thermoresistance                                                                                                                                                                       |
| permease, localized to the plasma membrane; expression is tightly regulated by uracil levels and environmental cues                                                                                                                     |
| resistance MFS transporter, drug:H <sup>+</sup> antiporter-2 (14 Spanner) (DHA2) family                                                                                                                                                 |
| transporter, sugar porter (SP) family                                                                                                                                                                                                   |
| MFS-type transporter C1271.10c                                                                                                                                                                                                          |
| MFS-type transporter C947.06c                                                                                                                                                                                                           |
| transporter PTR2                                                                                                                                                                                                                        |
| amino acid permease, may act to supply the cell with amino acids as nitrogen source in nitrogen-poor conditions; transcription is induced under conditions of sulfur limitation; plays a role in regulating Ty1 transposition           |
| membrane protein PEX13                                                                                                                                                                                                                  |

|                               |
|-------------------------------|
| transporter ESBP6             |
| MFS-type transporter C3E7.06c |
