# Supplementary material
Source: publisher figshare collection journal article supplement (https://karger.figshare.com/articles/dataset/_/5091934)
Supplement: Supplementary file 5 [file 1]

**Table S1. Assembly statistics.**

| <b>Parameter</b>      | <b>Statistic</b> |
|-----------------------|------------------|
| <b>Contigs Number</b> | 9.167            |
| <b>Total Length</b>   | 26,993,752       |
| <b>Max Length</b>     | 66.763           |
| <b>N50</b>            | 5.465            |
| <b>N90</b>            | 1.13             |
