# Supplementary material
Source: publisher figshare collection journal article supplement (https://karger.figshare.com/articles/dataset/_/5091934)
Supplement: Supplementary file 6 [file 1]

**Table S3. Proteins present in three Brettanomyces strains**

|                        |                                                                                                                                                                                                                                                                                                                                                                                                                                                          |
|------------------------|----------------------------------------------------------------------------------------------------------------------------------------------------------------------------------------------------------------------------------------------------------------------------------------------------------------------------------------------------------------------------------------------------------------------------------------------------------|
| LAMAP LAMAP2480_0009   | vacuolar protein sorting-associated protein 16 homolog                                                                                                                                                                                                                                                                                                                                                                                                   |
| CBS2499v2 CBS2499_0032 | vacuolar protein sorting-associated protein 16 homolog                                                                                                                                                                                                                                                                                                                                                                                                   |
| AWRIv2 AWRI_0804       | vacuolar protein sorting-associated protein 16 homolog                                                                                                                                                                                                                                                                                                                                                                                                   |
| LAMAP LAMAP2480_0024   | receptor cluster member 8 homolog                                                                                                                                                                                                                                                                                                                                                                                                                        |
| CBS2499v2 CBS2499_0048 | receptor cluster member 8 homolog                                                                                                                                                                                                                                                                                                                                                                                                                        |
| AWRIv2 AWRI_0818       | homolog C2A9.11c                                                                                                                                                                                                                                                                                                                                                                                                                                         |
| LAMAP LAMAP2480_0028   | binding protein with preference for single stranded tracts of U's involved in synthesis of both 18S and 5.8S rRNAs; component of both the ribosomal small subunit (SSU) processosome and the 90S preribosome                                                                                                                                                                                                                                             |
| CBS2499v2 CBS2499_0052 | binding protein involved in synthesis of both 18S and 5.8S rRNAs; component of both the ribosomal small subunit (SSU) processosome and the 90S preribosome; acts as part of a Mak21p-Noc2p-Rrp5p module that associates with nascent pre-rRNA during transcription and has a role in bigenesis of the large ribosomal subunit; has binding preference for single stranded tracts of U's; relocates from nucleolus to nucleus upon DNA replication stress |
| AWRIv2 AWRI_0822       | nucleotidyltransferase                                                                                                                                                                                                                                                                                                                                                                                                                                   |
| LAMAP LAMAP2480_0033   | protein _1004                                                                                                                                                                                                                                                                                                                                                                                                                                            |
| CBS2499v2 CBS2499_0057 | protein _1004                                                                                                                                                                                                                                                                                                                                                                                                                                            |
| AWRIv2 AWRI_0826       | protein _1004                                                                                                                                                                                                                                                                                                                                                                                                                                            |
| LAMAP LAMAP2480_0054   | GIR2                                                                                                                                                                                                                                                                                                                                                                                                                                                     |
| CBS2499v2 CBS2499_0076 | GIR2                                                                                                                                                                                                                                                                                                                                                                                                                                                     |
| AWRIv2 AWRI_0843       | GIR2                                                                                                                                                                                                                                                                                                                                                                                                                                                     |
| LAMAP LAMAP2480_0070   | protein _1041                                                                                                                                                                                                                                                                                                                                                                                                                                            |
| CBS2499v2 CBS2499_0089 | protein _1041                                                                                                                                                                                                                                                                                                                                                                                                                                            |
| AWRIv2 AWRI_0854       | protein _1041                                                                                                                                                                                                                                                                                                                                                                                                                                            |
| LAMAP LAMAP2480_0098   | fusion degradation protein 4                                                                                                                                                                                                                                                                                                                                                                                                                             |
| CBS2499v2 CBS2499_0111 | fusion degradation protein 4                                                                                                                                                                                                                                                                                                                                                                                                                             |
| AWRIv2 AWRI_3815       | fusion degradation protein 4                                                                                                                                                                                                                                                                                                                                                                                                                             |
| LAMAP LAMAP2480_0112   | protein _3833                                                                                                                                                                                                                                                                                                                                                                                                                                            |
| CBS2499v2 CBS2499_0125 | protein _3833                                                                                                                                                                                                                                                                                                                                                                                                                                            |
| AWRIv2 AWRI_3189       | protein _3833                                                                                                                                                                                                                                                                                                                                                                                                                                            |
| LAMAP LAMAP2480_0115   | RPN4                                                                                                                                                                                                                                                                                                                                                                                                                                                     |
| CBS2499v2 CBS2499_0130 | regulator RPN4                                                                                                                                                                                                                                                                                                                                                                                                                                           |
| AWRIv2 AWRI_3194       | regulator RPN4                                                                                                                                                                                                                                                                                                                                                                                                                                           |
| LAMAP LAMAP2480_0117   | nuclear membrane protein SRC1                                                                                                                                                                                                                                                                                                                                                                                                                            |
| CBS2499v2 CBS2499_0132 | nuclear membrane protein SRC1                                                                                                                                                                                                                                                                                                                                                                                                                            |
| AWRIv2 AWRI_3196       | chromatid separation protein                                                                                                                                                                                                                                                                                                                                                                                                                             |
| LAMAP LAMAP2480_0119   | <b>proton symporter of the plasma membrane, subject to glucose-induced inactivation, strongly but transiently induced when cells are subjected to osmotic shock</b>                                                                                                                                                                                                                                                                                      |
| CBS2499v2 CBS2499_0134 | proton symporter of the plasma membrane; subject to glucose-induced inactivation, strongly but transiently induced when cells are subjected to osmotic shock                                                                                                                                                                                                                                                                                             |
| AWRIv2 AWRI_3199       | proton symporter of the plasma membrane; subject to glucose-induced inactivation, strongly but transiently induced when cells are subjected to osmotic shock                                                                                                                                                                                                                                                                                             |

|                        |                                                                                                                                                                                                                                                                 |   |
|------------------------|-----------------------------------------------------------------------------------------------------------------------------------------------------------------------------------------------------------------------------------------------------------------|---|
| LAMAP LAMAP2480_0122   | protein CUE5                                                                                                                                                                                                                                                    |   |
| CBS2499v2 CBS2499_0137 | protein CUE5                                                                                                                                                                                                                                                    |   |
| AWRIv2 AWRI_3202       | protein CUE5                                                                                                                                                                                                                                                    |   |
|                        | <b>of the Sec1p/Munc-18 family, essential for vacuolar protein sorting; required for the function of Pep12p and the early endosome/late Golgi SNARE Tlg2p; essential for fusion of Golgi-derived vesicles with the prevacuolar compartment</b>                  |   |
| LAMAP LAMAP2480_0131   | of the Sec1p/Munc-18 family; essential for vacuolar protein sorting; required for the function of Pep12p and the early endosome/late Golgi SNARE Tlg2p; essential for fusion of Golgi-derived vesicles with the prevacuolar compartment                         |   |
| CBS2499v2 CBS2499_0144 | protein sorting-associated protein 45                                                                                                                                                                                                                           | 2 |
| AWRIv2 AWRI_3208       |                                                                                                                                                                                                                                                                 | 2 |
| LAMAP LAMAP2480_0136   |                                                                                                                                                                                                                                                                 | 2 |
| CBS2499v2 CBS2499_0148 |                                                                                                                                                                                                                                                                 |   |
| AWRIv2 AWRI_3214       |                                                                                                                                                                                                                                                                 |   |
| LAMAP LAMAP2480_0139   | V, beta subunit                                                                                                                                                                                                                                                 |   |
| CBS2499v2 CBS2499_0151 | V, beta subunit                                                                                                                                                                                                                                                 |   |
| AWRIv2 AWRI_3216       | DNA helicase PcrA                                                                                                                                                                                                                                               |   |
| LAMAP LAMAP2480_0151   | wos2                                                                                                                                                                                                                                                            |   |
| CBS2499v2 CBS2499_0164 | wos2                                                                                                                                                                                                                                                            |   |
| AWRIv2 AWRI_2194       | wos2                                                                                                                                                                                                                                                            |   |
| LAMAP LAMAP2480_0152   | <b>oxidase, integral membrane protein with similarity to Fet3p; may have a role in iron transport</b>                                                                                                                                                           |   |
| CBS2499v2 CBS2499_0165 | oxidase; integral membrane protein with similarity to Fet3p; may have a role in iron transport                                                                                                                                                                  |   |
| AWRIv2 AWRI_2195       | oxidase; integral membrane protein with similarity to Fet3p; may have a role in iron transport                                                                                                                                                                  |   |
| LAMAP LAMAP2480_0155   | transporter YNL095C                                                                                                                                                                                                                                             |   |
| CBS2499v2 CBS2499_0168 | transporter YNL095C                                                                                                                                                                                                                                             |   |
| AWRIv2 AWRI_2198       | transporter YNL095C                                                                                                                                                                                                                                             |   |
| LAMAP LAMAP2480_0177   | phosphatidylinositol transfer protein (PITP); exhibits PI- but not PC-transfer activity; localizes to the peripheral endoplasmic reticulum, cytosol and microsomes; similar to Sec14p                                                                           |   |
| CBS2499v2 CBS2499_0188 | protein                                                                                                                                                                                                                                                         |   |
|                        | phosphatidylinositol transfer protein (PITP); exhibits PI- but not PC-transfer activity; localizes to the peripheral endoplasmic reticulum, cytosol and microsomes; similar to Sec14p; partially relocalizes to the plasma membrane upon DNA replication stress |   |
| AWRIv2 AWRI_2216       | OCA4                                                                                                                                                                                                                                                            |   |
| LAMAP LAMAP2480_0180   | OCA4                                                                                                                                                                                                                                                            |   |
| CBS2499v2 CBS2499_0191 | protein _2653                                                                                                                                                                                                                                                   |   |
| AWRIv2 AWRI_2219       | kinase PSK1                                                                                                                                                                                                                                                     |   |
| LAMAP LAMAP2480_0184   | kinase PSK1                                                                                                                                                                                                                                                     |   |
| CBS2499v2 CBS2499_0196 | kinase PSK2                                                                                                                                                                                                                                                     |   |
| AWRIv2 AWRI_2224       | chromatin-remodeling complex subunit snf5                                                                                                                                                                                                                       |   |
| LAMAP LAMAP2480_0191   | chromatin-remodeling complex subunit snf5                                                                                                                                                                                                                       |   |
| CBS2499v2 CBS2499_0204 | chromatin-remodeling complex subunit SNF5                                                                                                                                                                                                                       |   |
| AWRIv2 AWRI_2231       | factor 1-gamma 2                                                                                                                                                                                                                                                |   |
| LAMAP LAMAP2480_0192   | S-transferase Y-2                                                                                                                                                                                                                                               |   |
| CBS2499v2 CBS2499_0205 | S-transferase Y-2                                                                                                                                                                                                                                               |   |
| AWRIv2 AWRI_2232       |                                                                                                                                                                                                                                                                 |   |

LAMAP|LAMAP2480\_0196  
CBS2499v2|CBS2499\_0209  
AWRIv2|AWRI\_2235  
LAMAP|LAMAP2480\_0205  
CBS2499v2|CBS2499\_0218  
AWRIv2|AWRI\_2241  
LAMAP|LAMAP2480\_0214  
CBS2499v2|CBS2499\_0227  
AWRIv2|AWRI\_3284  
LAMAP|LAMAP2480\_0215  
CBS2499v2|CBS2499\_0228  
AWRIv2|AWRI\_3283  
LAMAP|LAMAP2480\_0239  
CBS2499v2|CBS2499\_0250  
AWRIv2|AWRI\_3263  
LAMAP|LAMAP2480\_0244  
CBS2499v2|CBS2499\_0255  
AWRIv2|AWRI\_3260  
LAMAP|LAMAP2480\_0256  
CBS2499v2|CBS2499\_0267  
AWRIv2|AWRI\_2007  
LAMAP|LAMAP2480\_0258  
CBS2499v2|CBS2499\_0269  
AWRIv2|AWRI\_2006

LAMAP|LAMAP2480\_0259

CBS2499v2|CBS2499\_0271  
AWRIv2|AWRI\_2005  
LAMAP|LAMAP2480\_0267  
CBS2499v2|CBS2499\_0278  
AWRIv2|AWRI\_2002  
LAMAP|LAMAP2480\_0277  
CBS2499v2|CBS2499\_0288  
AWRIv2|AWRI\_1992  
LAMAP|LAMAP2480\_0286  
CBS2499v2|CBS2499\_0297  
AWRIv2|AWRI\_1987  
LAMAP|LAMAP2480\_0288  
CBS2499v2|CBS2499\_0299  
AWRIv2|AWRI\_1985  
LAMAP|LAMAP2480\_0295

initiation factor IIE subunit alpha  
initiation factor IIE subunit alpha  
initiation factor IIE subunit alpha  
**fusion and transport protein UGO1**  
fusion and transport protein UGO1  
fusion and transport protein UGO1  
component SPP1  
component SPP1  
component SPP1  
acetyltransferase type B subunit 2  
acetyltransferase type B subunit 2  
acetyltransferase type B subunit 2  
family protein C10F6.14c  
family protein C10F6.14c  
family protein C10F6.14c  
NRD1  
NRD1  
NRD1  
protein \_2405  
protein \_2405  
protein \_2405  
protein YKL047W  
protein ANR2  
protein

of unknown function that may interact with ribosomes, based on co-purification experiments; member of the ovarian tumor-like (OTU) superfamily of predicted cysteine proteases; shows cytoplasmic localization  
of unknown function; may interact with ribosomes, based on co-purification experiments; member of the ovarian tumor-like (OTU) superfamily of predicted cysteine proteases; shows cytoplasmic localization; protein abundance increases in response to DNA replication stress  
domain-containing protein 2  
**repair protein RAD57**  
repair protein RAD57  
repair protein RAD57  
transcriptional regulatory protein C417.09c  
transcriptional regulatory protein C417.09c  
protein  
protein \_2375  
protein \_2375  
protein \_2375  
kinase-like protein  
kinase-like protein  
kinase-like protein  
dehydrogenase kinase 2, mitochondrial

|                                                                                                                                                                                                                                                              |                                                                                                                                                                                                                                                                                                                                                                                                                                                                                                                                                                                                                                  |
|--------------------------------------------------------------------------------------------------------------------------------------------------------------------------------------------------------------------------------------------------------------|----------------------------------------------------------------------------------------------------------------------------------------------------------------------------------------------------------------------------------------------------------------------------------------------------------------------------------------------------------------------------------------------------------------------------------------------------------------------------------------------------------------------------------------------------------------------------------------------------------------------------------|
| CBS2499v2 CBS2499_0307<br>AWRIv2 AWRI_1980<br>LAMAP LAMAP2480_0312<br>CBS2499v2 CBS2499_0327<br>AWRIv2 AWRI_1965                                                                                                                                             | dehydrogenase (acetyl-transferring)] kinase 2, mitochondrial<br>dehydrogenase (acetyl-transferring)] kinase 2, mitochondrial<br>light chain 5<br>light chain 5<br>light chain 5                                                                                                                                                                                                                                                                                                                                                                                                                                                  |
| LAMAP LAMAP2480_0350                                                                                                                                                                                                                                         | of a Cdc48p-complex involved in protein quality control; exhibits cytosolic and ER-membrane localization, with Cdc48p, during normal growth, and contributes to ER-associated degradation (ERAD) of specific substrates at a step after their ubiquitination; forms a mitochondrially-associated complex with Cdc48p and Npl4p under oxidative stress that is required for ubiquitin-mediated mitochondria-associated protein degradation (MAD); conserved in C. elegans and humans                                                                                                                                              |
| CBS2499v2 CBS2499_0366<br>AWRIv2 AWRI_3168<br>LAMAP LAMAP2480_0362<br>CBS2499v2 CBS2499_0378<br>AWRIv2 AWRI_3156<br>LAMAP LAMAP2480_0377<br>CBS2499v2 CBS2499_1423<br>AWRIv2 AWRI_3242<br>LAMAP LAMAP2480_0379<br>CBS2499v2 CBS2499_1425<br>AWRIv2 AWRI_3240 | of a Cdc48p-complex involved in protein quality control; exhibits cytosolic and ER-membrane localization, with Cdc48p, during normal growth, and contributes to ER-associated degradation (ERAD) of specific substrates at a step after their ubiquitination; forms a mitochondrially-associated complex with Cdc48p and Npl4p under oxidative stress that is required for ubiquitin-mediated mitochondria-associated protein degradation (MAD); conserved in C. elegans and humans<br>VMS1<br>ISD11<br>ISD11<br>ISD11<br>amidase C550.07<br>amidase C550.07<br>amidase C550.07<br>protein YOR352W<br>protein YOR352W<br>protein |
| LAMAP LAMAP2480_0403                                                                                                                                                                                                                                         | <b>subunit of the trehalose-6-phosphate synthase/phosphatase complex, which synthesizes the storage carbohydrate trehalose; expression is induced by stress conditions and repressed by the Ras-cAMP pathway</b><br>subunit of the trehalose-6-P synthase/phosphatase complex; involved in synthesis of the storage carbohydrate trehalose; expression is induced by stress conditions and repressed by the Ras-cAMP pathway; protein abundance increases in response to DNA replication stress                                                                                                                                  |
| CBS2499v2 CBS2499_1460<br>AWRIv2 AWRI_3768                                                                                                                                                                                                                   | of two isozymes of HMG-CoA reductase that catalyzes the conversion of HMG-CoA to mevalonate, which is a rate-limiting step in sterol biosynthesis; localizes to the nuclear envelope; overproduction induces the formation of karmellae                                                                                                                                                                                                                                                                                                                                                                                          |
| LAMAP LAMAP2480_0404                                                                                                                                                                                                                                         | reductase; catalyzes the conversion of HMG-CoA to mevalonate, which is a rate-limiting step in sterol biosynthesis; one of two isozymes; localizes to the nuclear envelope; overproduction induces the formation of karmellae; forms foci at the nuclear periphery upon DNA replication stress; HMG1 has a paralog, HMG2, that arose from the whole genome duplication                                                                                                                                                                                                                                                           |
| CBS2499v2 CBS2499_1459<br>AWRIv2 AWRI_3769<br>LAMAP LAMAP2480_0416<br>CBS2499v2 CBS2499_1447                                                                                                                                                                 | reductase, degradative<br>type zinc finger protein asd-4<br>regulator GZF3                                                                                                                                                                                                                                                                                                                                                                                                                                                                                                                                                       |

AWRIv2|AWRI\_3224

LAMAP|LAMAP2480\_0423

CBS2499v2|CBS2499\_1440

AWRIv2|AWRI\_3228

LAMAP|LAMAP2480\_0430

CBS2499v2|CBS2499\_1432

AWRIv2|AWRI\_3232

LAMAP|LAMAP2480\_0441

CBS2499v2|CBS2499\_1422

AWRIv2|AWRI\_3243

LAMAP|LAMAP2480\_0445

CBS2499v2|CBS2499\_1419

AWRIv2|AWRI\_3246

LAMAP|LAMAP2480\_0460

CBS2499v2|CBS2499\_1404

AWRIv2|AWRI\_2015

LAMAP|LAMAP2480\_0464

CBS2499v2|CBS2499\_1399

AWRIv2|AWRI\_2018

LAMAP|LAMAP2480\_0479

CBS2499v2|CBS2499\_1383

AWRIv2|AWRI\_2035

LAMAP|LAMAP2480\_0512

CBS2499v2|CBS2499\_1351

AWRIv2|AWRI\_2062

LAMAP|LAMAP2480\_0517

CBS2499v2|CBS2499\_1345

AWRIv2|AWRI\_2065

LAMAP|LAMAP2480\_0522

CBS2499v2|CBS2499\_1338

AWRIv2|AWRI\_2071

LAMAP|LAMAP2480\_0527

CBS2499v2|CBS2499\_5081

AWRIv2|AWRI\_2074

LAMAP|LAMAP2480\_0528

CBS2499v2|CBS2499\_1333

AWRIv2|AWRI\_2075

LAMAP|LAMAP2480\_0546

regulator GZF3

component of the Translocase of the Inner Mitochondrial membrane (TIM23 complex); involved in protein import into mitochondrial matrix and inner membrane; with Tim17p, contributes to architecture and function of the import channel

component of the TIM23 complex; involved in protein import into mitochondrial matrix and inner membrane; with Tim17p, contributes to architecture and function of the import channel; TIM23 complex is short for the translocase of the inner mitochondrial membrane

component of the TIM23 complex; involved in protein import into mitochondrial matrix and inner membrane; with Tim17p, contributes to architecture and function of the import channel; TIM23 complex is short for the translocase of the inner mitochondrial membrane

F-box protein ROY1

F-box protein ROY1

F-box protein ROY1

**starvation modulator protein 1**

starvation modulator protein 1

starvation modulator protein 1

finger protein YKR017C

ubiquitin-protein ligase dbl4

ubiquitin-protein ligase dbl4

BCP1

BCP1

BCP1

modification-related protein EAF1

modification-related protein EAF1

modification-related protein EAF1

protein HPODL\_02750

protein HPODL\_02750

box protein I2

kinase srk1

kinase srk1

kinase srk1

polypeptide-associated complex subunit beta

polypeptide-associated complex subunit beta

polypeptide-associated complex subunit beta

protein \_2473

protein \_2473

protein \_2473

peculiar membrane protein 1

peculiar membrane protein 1

peculiar membrane protein 1

protein sorting-associated protein 52

protein sorting-associated protein 52 A

protein sorting-associated protein 52

ATP-dependent helicase C144.05

|                        |                                                                                                                                                                                       |
|------------------------|---------------------------------------------------------------------------------------------------------------------------------------------------------------------------------------|
| CBS2499v2 CBS2499_1319 | ATP-dependent helicase C144.05                                                                                                                                                        |
| AWRIv2 AWRI_3590       | ATP-dependent helicase IRC20                                                                                                                                                          |
| LAMAP LAMAP2480_0547   | kinase srk1                                                                                                                                                                           |
| CBS2499v2 CBS2499_1318 | kinase srk1                                                                                                                                                                           |
| AWRIv2 AWRI_3589       | kinase srk1                                                                                                                                                                           |
| LAMAP LAMAP2480_0552   | protein _4281                                                                                                                                                                         |
| CBS2499v2 CBS2499_1312 | protein _4281                                                                                                                                                                         |
| AWRIv2 AWRI_3584       | protein _4281                                                                                                                                                                         |
| LAMAP LAMAP2480_0555   | polymerase I subunit A49                                                                                                                                                              |
| CBS2499v2 CBS2499_1308 | polymerase I subunit A49; essential for nucleolar assembly and for high polymerase loading rate; required for nucleolar localization of Rpa34p                                        |
| AWRIv2 AWRI_3580       | polymerase I subunit A49; essential for nucleolar assembly and for high polymerase loading rate; required for nucleolar localization of Rpa34p                                        |
| LAMAP LAMAP2480_0556   | of unknown function; green fluorescent protein (GFP)-fusion protein localizes to the cytoplasm in a punctate pattern; induced by treatment with 8-methoxypsoralen and UVA irradiation |
| CBS2499v2 CBS2499_1307 | of unknown function; green fluorescent protein (GFP)-fusion protein localizes to the cytoplasm in a punctate pattern; induced by treatment with 8-methoxypsoralen and UVA irradiation |
| AWRIv2 AWRI_3579       | of unknown function; green fluorescent protein (GFP)-fusion protein localizes to the cytoplasm in a punctate pattern; induced by treatment with 8-methoxypsoralen and UVA irradiation |
| LAMAP LAMAP2480_0558   | protein YMR310C                                                                                                                                                                       |
| CBS2499v2 CBS2499_1305 | methytransferase YMR310C                                                                                                                                                              |
| AWRIv2 AWRI_3577       | methytransferase YMR310C                                                                                                                                                              |
| LAMAP LAMAP2480_0616   | cytoplasmic protein of unknown function                                                                                                                                               |
| CBS2499v2 CBS2499_1893 | glycoside hydrolase of the mitochondrial intermembrane space                                                                                                                          |
| AWRIv2 AWRI_3988       | glycoside hydrolase of the mitochondrial intermembrane space                                                                                                                          |
| LAMAP LAMAP2480_0618   | protein                                                                                                                                                                               |
| CBS2499v2 CBS2499_1896 | protein                                                                                                                                                                               |
| AWRIv2 AWRI_3984       | protein                                                                                                                                                                               |
| LAMAP LAMAP2480_0621   | GDP-GTP exchange protein 2                                                                                                                                                            |
| CBS2499v2 CBS2499_1900 | GDP-GTP exchange protein 2                                                                                                                                                            |
| AWRIv2 AWRI_3979       | GDP-GTP exchange protein 2                                                                                                                                                            |
| LAMAP LAMAP2480_0630   | protein _2022                                                                                                                                                                         |
| CBS2499v2 CBS2499_4670 | protein _2022                                                                                                                                                                         |
| AWRIv2 AWRI_1716       | protein _2022                                                                                                                                                                         |
| LAMAP LAMAP2480_0636   | kinase PTK1/STK1                                                                                                                                                                      |
| CBS2499v2 CBS2499_4664 | kinase PTK1/STK1                                                                                                                                                                      |
| AWRIv2 AWRI_1718       | kinase PTK2                                                                                                                                                                           |
| LAMAP LAMAP2480_0638   | endonuclease subunit SEN54                                                                                                                                                            |
| CBS2499v2 CBS2499_4663 | endonuclease subunit SEN54                                                                                                                                                            |
| AWRIv2 AWRI_1719       | endonuclease subunit SEN54                                                                                                                                                            |
| LAMAP LAMAP2480_0639   | factor 11                                                                                                                                                                             |
| CBS2499v2 CBS2499_4662 | factor 11                                                                                                                                                                             |
| AWRIv2 AWRI_1720       | factor 11                                                                                                                                                                             |
| LAMAP LAMAP2480_0646   | phosphatase MSG5                                                                                                                                                                      |

CBS2499v2|CBS2499\_4655  
AWRIv2|AWRI\_1724  
LAMAP|LAMAP2480\_0647  
CBS2499v2|CBS2499\_4654  
AWRIv2|AWRI\_1725  
LAMAP|LAMAP2480\_0649  
CBS2499v2|CBS2499\_4652  
AWRIv2|AWRI\_1727  
LAMAP|LAMAP2480\_0650  
CBS2499v2|CBS2499\_4651

AWRIv2|AWRI\_1728  
LAMAP|LAMAP2480\_0651  
CBS2499v2|CBS2499\_4650  
AWRIv2|AWRI\_1729  
LAMAP|LAMAP2480\_0660  
CBS2499v2|CBS2499\_4639  
AWRIv2|AWRI\_1736  
LAMAP|LAMAP2480\_0679  
CBS2499v2|CBS2499\_4620  
AWRIv2|AWRI\_1750  
LAMAP|LAMAP2480\_0686  
CBS2499v2|CBS2499\_4613

AWRIv2|AWRI\_1753  
LAMAP|LAMAP2480\_0690  
CBS2499v2|CBS2499\_5100  
AWRIv2|AWRI\_1755  
LAMAP|LAMAP2480\_0700  
CBS2499v2|CBS2499\_4067  
AWRIv2|AWRI\_1757  
LAMAP|LAMAP2480\_0715  
CBS2499v2|CBS2499\_4052  
AWRIv2|AWRI\_0322  
LAMAP|LAMAP2480\_0717  
CBS2499v2|CBS2499\_4050  
AWRIv2|AWRI\_0321  
LAMAP|LAMAP2480\_0721  
CBS2499v2|CBS2499\_4045  
AWRIv2|AWRI\_0318

phosphatase MSG5  
phosphatase MSG5  
repeat domain-containing protein 12  
HOS4  
protein  
alcohol dehydrogenase transcriptional effector  
alcohol dehydrogenase transcriptional effector  
alcohol dehydrogenase transcriptional effector  
III homolog  
III homolog

N-glycosylase and apurinic/aprimidinic (AP) lyase; involved in base excision repair, localizes to the nucleus;  
sumoylated; NTG2 has a paralog, NTG1, that arose from the whole genome duplication  
protein \_2039  
protein \_2039  
protein \_2039  
small nucleolar RNA-associated protein 5  
small nucleolar RNA-associated protein 5  
small nucleolar RNA-associated protein 5  
phosphatase superfamily (branch 1)  
phosphomutase ARB\_03491  
phosphomutase ARB\_03491  
SSO1  
SSO1

membrane t-SNARE; involved in fusion of secretory vesicles at the plasma membrane and in vesicle fusion  
during sporulation; forms a complex with Sec9p that binds v-SNARE Snc2p; syntaxin homolog; functionally  
redundant with Sso2p; SSO1 has a paralog, SSO2, that arose from the whole genome duplication  
protein STM1  
protein STM1  
protein STM1  
protein \_2086  
protein \_2086  
protein \_2086  
c-terminal hydrolase family protein  
c-terminal hydrolase family protein  
c-terminal hydrolase family protein  
hob3  
hob3  
hob3  
protein rad52  
protein rad52  
protein rad52

|                        |                                                                                                                                                                                                                                                                                                                                                                                                                                                                                     |
|------------------------|-------------------------------------------------------------------------------------------------------------------------------------------------------------------------------------------------------------------------------------------------------------------------------------------------------------------------------------------------------------------------------------------------------------------------------------------------------------------------------------|
| LAMAP LAMAP2480_0745   | <b>oxide oxidoreductase, flavohemoglobin involved in nitric oxide detoxification; plays a role in the oxidative and nitrosative stress responses</b>                                                                                                                                                                                                                                                                                                                                |
| CBS2499v2 CBS2499_4023 | oxide oxidoreductase; flavohemoglobin involved in nitric oxide detoxification; plays a role in the oxidative and nitrosative stress responses; protein increases in abundance and relocalizes from nucleus to cytoplasmic foci upon DNA replication stress                                                                                                                                                                                                                          |
| AWRIv2 AWRI_0301       | oxide oxidoreductase; flavohemoglobin involved in nitric oxide detoxification; plays a role in the oxidative and nitrosative stress responses; protein increases in abundance and relocalizes from nucleus to cytoplasmic foci upon DNA replication stress                                                                                                                                                                                                                          |
| LAMAP LAMAP2480_0753   | factor for nuclear proteasome STS1                                                                                                                                                                                                                                                                                                                                                                                                                                                  |
| CBS2499v2 CBS2499_4014 | factor for nuclear proteasome STS1                                                                                                                                                                                                                                                                                                                                                                                                                                                  |
| AWRIv2 AWRI_0295       | factor for nuclear proteasome STS1                                                                                                                                                                                                                                                                                                                                                                                                                                                  |
| LAMAP LAMAP2480_0759   | small nuclear ribonucleoprotein Prp3                                                                                                                                                                                                                                                                                                                                                                                                                                                |
| CBS2499v2 CBS2499_4008 | small nuclear ribonucleoprotein prp3                                                                                                                                                                                                                                                                                                                                                                                                                                                |
| AWRIv2 AWRI_0292       | small nuclear ribonucleoprotein Prp3                                                                                                                                                                                                                                                                                                                                                                                                                                                |
| LAMAP LAMAP2480_0764   | <b>protein of unknown function; expression repressed by inosine and choline in an Opi1p-dependent manner; expression induced by mild heat-stress on a non-fermentable carbon source.</b>                                                                                                                                                                                                                                                                                            |
| CBS2499v2 CBS2499_4004 | of unknown function; inhibits haploid invasive growth when overexpressed; synthetically lethal with phospholipase C (PLC1); expression induced by mild heat-stress on a non-fermentable carbon source, upon entry into stationary phase and upon nitrogen deprivation; repressed by inosine and choline in an Opi1p-dependent manner; highly conserved from bacteria to human; Memo, the human homolog, is an ErbB2 interacting protein with an essential function in cell motility |
| AWRIv2 AWRI_0288       | of unknown function; inhibits haploid invasive growth when overexpressed; synthetically lethal with phospholipase C (PLC1); expression induced by mild heat-stress on a non-fermentable carbon source, upon entry into stationary phase and upon nitrogen deprivation; repressed by inosine and choline in an Opi1p-dependent manner; highly conserved from bacteria to human; Memo, the human homolog, is an ErbB2 interacting protein with an essential function in cell motility |
| LAMAP LAMAP2480_0770   | cluster assembly protein DRE2                                                                                                                                                                                                                                                                                                                                                                                                                                                       |
| CBS2499v2 CBS2499_3999 | cluster assembly protein DRE2                                                                                                                                                                                                                                                                                                                                                                                                                                                       |
| AWRIv2 AWRI_0284       | cluster assembly protein DRE2                                                                                                                                                                                                                                                                                                                                                                                                                                                       |
| LAMAP LAMAP2480_0773   | D-site endonuclease NOB1                                                                                                                                                                                                                                                                                                                                                                                                                                                            |
| CBS2499v2 CBS2499_3996 | D-site endonuclease NOB1                                                                                                                                                                                                                                                                                                                                                                                                                                                            |
| AWRIv2 AWRI_0281       | D-site endonuclease nob1                                                                                                                                                                                                                                                                                                                                                                                                                                                            |
| LAMAP LAMAP2480_0792   | protein ARP8                                                                                                                                                                                                                                                                                                                                                                                                                                                                        |
| CBS2499v2 CBS2499_3977 | protein ARP8                                                                                                                                                                                                                                                                                                                                                                                                                                                                        |
| AWRIv2 AWRI_0267       | protein ARP8                                                                                                                                                                                                                                                                                                                                                                                                                                                                        |
| LAMAP LAMAP2480_0799   | polymerase II transcription factor B subunit 1                                                                                                                                                                                                                                                                                                                                                                                                                                      |
| CBS2499v2 CBS2499_3971 | polymerase II transcription factor B subunit 1                                                                                                                                                                                                                                                                                                                                                                                                                                      |
| AWRIv2 AWRI_0259       | of TFIIH and nucleotide excision repair factor 3 complexes; required for nucleotide excision repair, target for transcriptional activators; relocalizes to the cytosol in response to hypoxia                                                                                                                                                                                                                                                                                       |
| LAMAP LAMAP2480_0806   | protein kinase B                                                                                                                                                                                                                                                                                                                                                                                                                                                                    |
| CBS2499v2 CBS2499_0475 | protein kinase B                                                                                                                                                                                                                                                                                                                                                                                                                                                                    |
| AWRIv2 AWRI_3035       | protein kinase type 2                                                                                                                                                                                                                                                                                                                                                                                                                                                               |
| LAMAP LAMAP2480_0809   | protein HPODL_02852                                                                                                                                                                                                                                                                                                                                                                                                                                                                 |

|                        |                                                                                                                                                                                                                                                                                                                                                                                                                             |   |
|------------------------|-----------------------------------------------------------------------------------------------------------------------------------------------------------------------------------------------------------------------------------------------------------------------------------------------------------------------------------------------------------------------------------------------------------------------------|---|
| CBS2499v2 CBS2499_0478 | protein HPODL_02852                                                                                                                                                                                                                                                                                                                                                                                                         |   |
| AWRIv2 AWRI_3037       | domain protein                                                                                                                                                                                                                                                                                                                                                                                                              |   |
| LAMAP LAMAP2480_0829   | signalosome complex subunit 5                                                                                                                                                                                                                                                                                                                                                                                               |   |
| CBS2499v2 CBS2499_0500 | signalosome complex subunit 5                                                                                                                                                                                                                                                                                                                                                                                               |   |
| AWRIv2 AWRI_3855       | signalosome complex subunit 5                                                                                                                                                                                                                                                                                                                                                                                               |   |
| LAMAP LAMAP2480_0831   | hydrolase involved in mRNA decapping, may function in a feedback mechanism to regulate deadenylation, contains pyrophosphatase activity and a HIT (histidine triad) motif; interacts with neutral trehalase Nth1p                                                                                                                                                                                                           |   |
| CBS2499v2 CBS2499_0502 | hydrolase involved in mRNA decapping; activates Xrn1p; may function in a feedback mechanism to regulate deadenylation, contains pyrophosphatase activity and a HIT (histidine triad) motif; acts as inhibitor of neutral trehalase Nth1p; required for growth on glycerol medium; protein abundance increases in response to DNA replication stress; DCS1 has a paralog, DCS2, that arose from the whole genome duplication |   |
| AWRIv2 AWRI_3857       | hydrolase involved in mRNA decapping; activates Xrn1p; may function in a feedback mechanism to regulate deadenylation, contains pyrophosphatase activity and a HIT (histidine triad) motif; acts as inhibitor of neutral trehalase Nth1p; required for growth on glycerol medium; protein abundance increases in response to DNA replication stress; DCS1 has a paralog, DCS2, that arose from the whole genome duplication |   |
| LAMAP LAMAP2480_0851   | wry family protein 8                                                                                                                                                                                                                                                                                                                                                                                                        | 4 |
| CBS2499v2 CBS2499_0528 |                                                                                                                                                                                                                                                                                                                                                                                                                             | 4 |
| AWRIv2 AWRI_2389       |                                                                                                                                                                                                                                                                                                                                                                                                                             |   |
| LAMAP LAMAP2480_0887   | specificity protein kinase KNS1                                                                                                                                                                                                                                                                                                                                                                                             |   |
| CBS2499v2 CBS2499_5064 | specificity protein kinase KNS1                                                                                                                                                                                                                                                                                                                                                                                             |   |
| AWRIv2 AWRI_2376       | specificity protein kinase KNS1                                                                                                                                                                                                                                                                                                                                                                                             |   |
| LAMAP LAMAP2480_0893   | protein _2846                                                                                                                                                                                                                                                                                                                                                                                                               |   |
| CBS2499v2 CBS2499_0564 | protein _2846                                                                                                                                                                                                                                                                                                                                                                                                               |   |
| AWRIv2 AWRI_2373       | protein _2846                                                                                                                                                                                                                                                                                                                                                                                                               |   |
| LAMAP LAMAP2480_0910   | isoform of tropomyosin, binds to and stabilizes actin cables and filaments, which direct polarized cell growth and the distribution of several organelles; appears to have distinct and also overlapping functions with Tpm1p                                                                                                                                                                                               |   |
| CBS2499v2 CBS2499_0587 | isoform of tropomyosin; binds to and stabilizes actin cables and filaments, which direct polarized cell growth and the distribution of several organelles; appears to have distinct and also overlapping functions with Tpm1p; TPM2 has a paralog, TPM1, that arose from the whole genome duplication                                                                                                                       |   |
| AWRIv2 AWRI_3449       | isoform of tropomyosin; binds to and stabilizes actin cables and filaments, which direct polarized cell growth and the distribution of several organelles; appears to have distinct and also overlapping functions with Tpm1p; TPM2 has a paralog, TPM1, that arose from the whole genome duplication                                                                                                                       |   |
| LAMAP LAMAP2480_0912   | TMA108                                                                                                                                                                                                                                                                                                                                                                                                                      |   |
| CBS2499v2 CBS2499_0589 | TMA108                                                                                                                                                                                                                                                                                                                                                                                                                      |   |
| AWRIv2 AWRI_3447       | TMA108                                                                                                                                                                                                                                                                                                                                                                                                                      |   |
| LAMAP LAMAP2480_0926   | initiation factor 4F subunit p130                                                                                                                                                                                                                                                                                                                                                                                           |   |
| CBS2499v2 CBS2499_0602 | initiation factor 4F subunit p150                                                                                                                                                                                                                                                                                                                                                                                           |   |
| AWRIv2 AWRI_3434       | initiation factor 4F subunit p130                                                                                                                                                                                                                                                                                                                                                                                           |   |

|                        |                                                                                                              |
|------------------------|--------------------------------------------------------------------------------------------------------------|
| LAMAP LAMAP2480_0928   | protein product                                                                                              |
| CBS2499v2 CBS2499_0604 | finger protein 251                                                                                           |
| AWRIv2 AWRI_3432       | fusion degradation protein                                                                                   |
| LAMAP LAMAP2480_0931   | dehydrogenase                                                                                                |
| CBS2499v2 CBS2499_0607 | dehydrogenase                                                                                                |
| AWRIv2 AWRI_3430       | dehydrogenase                                                                                                |
| LAMAP LAMAP2480_0958   | and RSC complexes subunit ssr2                                                                               |
|                        | of the RSC chromatin remodeling complex; essential for viability and mitotic growth; homolog of SWI/SNF      |
| CBS2499v2 CBS2499_0632 | subunit Swi3p, but unlike Swi3p, does not activate transcription of reporters                                |
| AWRIv2 AWRI_3632       | and RSC complexes subunit ssr2                                                                               |
| LAMAP LAMAP2480_0971   | coactivator HFI1/ADA1                                                                                        |
| CBS2499v2 CBS2499_0645 | coactivator HFI1/ADA1                                                                                        |
| AWRIv2 AWRI_3642       | coactivator HFI1/ADA1                                                                                        |
| LAMAP LAMAP2480_0977   | ribosomal protein of the small subunit                                                                       |
| CBS2499v2 CBS2499_0651 | ribosomal protein of the small subunit                                                                       |
| AWRIv2 AWRI_3647       | ribosomal protein of the small subunit                                                                       |
| LAMAP LAMAP2480_1007   | transcription factor                                                                                         |
| CBS2499v2 CBS2499_0680 | transcription factor CAP1                                                                                    |
| AWRIv2 AWRI_0159       | transcription factor CAP1                                                                                    |
| LAMAP LAMAP2480_1010   | 35 NatC auxiliary subunit                                                                                    |
| CBS2499v2 CBS2499_0683 | 35 NatC auxiliary subunit                                                                                    |
| AWRIv2 AWRI_0156       | subunit of n-terminal acetyltransferase of the type                                                          |
|                        | synthase, catalyzes only the formation of pseudouridine-55 (Psi55), a highly conserved tRNA modification, in |
|                        | mitochondrial and cytoplasmic tRNAs; PUS4 overexpression leads to translational derepression of GCN4         |
| LAMAP LAMAP2480_1020   | (Gcd- phenotype)                                                                                             |
|                        |                                                                                                              |
|                        | synthase; catalyzes only the formation of pseudouridine-55 (Psi55), a highly conserved tRNA modification, in |
|                        | mitochondrial and cytoplasmic tRNAs; also responsible for pseudouracil modification of some mRNAs; PUS4      |
| CBS2499v2 CBS2499_2315 | overexpression leads to translational derepression of GCN4 (Gcd- phenotype)                                  |
|                        |                                                                                                              |
|                        | synthase; catalyzes only the formation of pseudouridine-55 (Psi55), a highly conserved tRNA modification, in |
|                        | mitochondrial and cytoplasmic tRNAs; also responsible for pseudouracil modification of some mRNAs; PUS4      |
|                        | overexpression leads to translational derepression of GCN4 (Gcd- phenotype)                                  |
| AWRIv2 AWRI_1372       | protein YHR097C                                                                                              |
| LAMAP LAMAP2480_1033   | protein YHR097C                                                                                              |
| CBS2499v2 CBS2499_2331 | protein YHR097C                                                                                              |
| AWRIv2 AWRI_1365       | division control protein 15                                                                                  |
| LAMAP LAMAP2480_1037   | division control protein 15                                                                                  |
| CBS2499v2 CBS2499_2336 | division control protein 15                                                                                  |
| AWRIv2 AWRI_1361       | division control protein 15                                                                                  |
| LAMAP LAMAP2480_1038   | <b>and cobalt transport protein CorA</b>                                                                     |
| CBS2499v2 CBS2499_2337 | and cobalt transport protein CorA                                                                            |
| AWRIv2 AWRI_1360       | and cobalt transport protein CorA                                                                            |
| LAMAP LAMAP2480_1045   | tyrosine-protein phosphatase C                                                                               |
| CBS2499v2 CBS2499_2345 | tyrosine-protein phosphatase alpha                                                                           |

|                        |                                                                                                                                                                                                                                                                                                                                                                                                                                         |
|------------------------|-----------------------------------------------------------------------------------------------------------------------------------------------------------------------------------------------------------------------------------------------------------------------------------------------------------------------------------------------------------------------------------------------------------------------------------------|
| AWRIv2 AWRI_1351       | tyrosine-protein phosphatase alpha                                                                                                                                                                                                                                                                                                                                                                                                      |
| LAMAP LAMAP2480_1053   | component of the Translocase of the Inner Mitochondrial membrane (TIM23 complex); acts as receptor for the TIM23 complex guiding incoming precursors from the TOM complex; may control the gating of the Tim23p-Tim17p channel                                                                                                                                                                                                          |
| CBS2499v2 CBS2499_2352 | component of the TIM23 complex; acts as receptor for the translocase of the inner mitochondrial membrane (TIM23) complex guiding incoming precursors from the TOM complex; may control the gating of the Tim23p-Tim17p channel                                                                                                                                                                                                          |
| AWRIv2 AWRI_1343       | import inner membrane translocase subunit TIM50                                                                                                                                                                                                                                                                                                                                                                                         |
| LAMAP LAMAP2480_1062   | hypothetical protein                                                                                                                                                                                                                                                                                                                                                                                                                    |
| CBS2499v2 CBS2499_2362 | protein MEO_01155                                                                                                                                                                                                                                                                                                                                                                                                                       |
| AWRIv2 AWRI_1338       | protein _1594                                                                                                                                                                                                                                                                                                                                                                                                                           |
| LAMAP LAMAP2480_1065   | subunit beta-2                                                                                                                                                                                                                                                                                                                                                                                                                          |
| CBS2499v2 CBS2499_2366 | subunit beta-2                                                                                                                                                                                                                                                                                                                                                                                                                          |
| AWRIv2 AWRI_1334       |                                                                                                                                                                                                                                                                                                                                                                                                                                         |
| LAMAP LAMAP2480_1070   | ubiquitin-protein ligase complex SLX5-SLX8 subunit SLX5                                                                                                                                                                                                                                                                                                                                                                                 |
| CBS2499v2 CBS2499_2372 | ubiquitin-protein ligase complex SLX5-SLX8 subunit SLX5                                                                                                                                                                                                                                                                                                                                                                                 |
| AWRIv2 AWRI_1327       | metabolism-related protein                                                                                                                                                                                                                                                                                                                                                                                                              |
| LAMAP LAMAP2480_1084   | BIG1                                                                                                                                                                                                                                                                                                                                                                                                                                    |
| CBS2499v2 CBS2499_2386 | BIG1                                                                                                                                                                                                                                                                                                                                                                                                                                    |
| AWRIv2 AWRI_1316       | BIG1                                                                                                                                                                                                                                                                                                                                                                                                                                    |
| LAMAP LAMAP2480_1096   | <b>fumarate reductase, required with isoenzyme Osm1p for anaerobic growth; may interact with ribosomes, based on co-purification experiments; authentic, non-tagged protein is detected in purified mitochondria in high-throughput studies</b>                                                                                                                                                                                         |
| CBS2499v2 CBS2499_2402 | fumarate reductase; required with isoenzyme Osm1p for anaerobic growth; may interact with ribosomes, based on co-purification experiments; authentic, non-tagged protein is detected in purified mitochondria in high-throughput studies; similar to Arxula adeninovorans fumarate reductase; protein abundance increases in response to DNA replication stress; FRD1 has a paralog, OSM1, that arose from the whole genome duplication |
| AWRIv2 AWRI_1302       | fumarate reductase; required with isoenzyme Osm1p for anaerobic growth; may interact with ribosomes, based on co-purification experiments; authentic, non-tagged protein is detected in purified mitochondria in high-throughput studies; similar to Arxula adeninovorans fumarate reductase; protein abundance increases in response to DNA replication stress; FRD1 has a paralog, OSM1, that arose from the whole genome duplication |
| LAMAP LAMAP2480_1097   | protein _1551                                                                                                                                                                                                                                                                                                                                                                                                                           |
| CBS2499v2 CBS2499_2403 | protein _1551                                                                                                                                                                                                                                                                                                                                                                                                                           |
| AWRIv2 AWRI_1301       | protein _1551                                                                                                                                                                                                                                                                                                                                                                                                                           |
| LAMAP LAMAP2480_1098   | 4-phosphate cytidylyltransferase                                                                                                                                                                                                                                                                                                                                                                                                        |
| CBS2499v2 CBS2499_2404 | 4-phosphate cytidylyltransferase                                                                                                                                                                                                                                                                                                                                                                                                        |
| AWRIv2 AWRI_1300       | mannose-1-phosphate guanylyltransferase                                                                                                                                                                                                                                                                                                                                                                                                 |
| LAMAP LAMAP2480_1113   | translation initiation factor 3 subunit                                                                                                                                                                                                                                                                                                                                                                                                 |
| CBS2499v2 CBS2499_2420 | translation initiation factor 3 subunit                                                                                                                                                                                                                                                                                                                                                                                                 |
| AWRIv2 AWRI_3311       | translation initiation factor 3 subunit D                                                                                                                                                                                                                                                                                                                                                                                               |
| LAMAP LAMAP2480_1117   | carboxyl-terminal hydrolase 14                                                                                                                                                                                                                                                                                                                                                                                                          |
| CBS2499v2 CBS2499_2425 | carboxyl-terminal hydrolase 14                                                                                                                                                                                                                                                                                                                                                                                                          |

|                        |                                                                                                                                                                                                                                                                                                                                                                                                            |
|------------------------|------------------------------------------------------------------------------------------------------------------------------------------------------------------------------------------------------------------------------------------------------------------------------------------------------------------------------------------------------------------------------------------------------------|
| AWRIv2 AWRI_3306       | carboxyl-terminal hydrolase 14                                                                                                                                                                                                                                                                                                                                                                             |
| LAMAP LAMAP2480_1128   | phospholipase YOR022C, mitochondrial                                                                                                                                                                                                                                                                                                                                                                       |
| CBS2499v2 CBS2499_2435 | phospholipase YOR022C, mitochondrial                                                                                                                                                                                                                                                                                                                                                                       |
| AWRIv2 AWRI_3295       | phospholipase YOR022C, mitochondrial                                                                                                                                                                                                                                                                                                                                                                       |
| LAMAP LAMAP2480_1137   | protein _3945                                                                                                                                                                                                                                                                                                                                                                                              |
| CBS2499v2 CBS2499_2444 | protein _3945                                                                                                                                                                                                                                                                                                                                                                                              |
| AWRIv2 AWRI_3289       | protein _3945                                                                                                                                                                                                                                                                                                                                                                                              |
| LAMAP LAMAP2480_1141   | polymerase II subunit A C-terminal domain phosphatase                                                                                                                                                                                                                                                                                                                                                      |
| CBS2499v2 CBS2499_2447 | phosphatase, phosphatase domain                                                                                                                                                                                                                                                                                                                                                                            |
| AWRIv2 AWRI_3287       | polymerase II subunit A C-terminal domain phosphatase                                                                                                                                                                                                                                                                                                                                                      |
| LAMAP LAMAP2480_1154   | RNA polymerase III subunit RPC4                                                                                                                                                                                                                                                                                                                                                                            |
| CBS2499v2 CBS2499_4101 | RNA polymerase III subunit RPC4                                                                                                                                                                                                                                                                                                                                                                            |
| AWRIv2 AWRI_2742       | rna polymerase iii subunit c4                                                                                                                                                                                                                                                                                                                                                                              |
| LAMAP LAMAP2480_1199   | reductase [NADPH]                                                                                                                                                                                                                                                                                                                                                                                          |
| CBS2499v2 CBS2499_5053 | reductase [NADPH]                                                                                                                                                                                                                                                                                                                                                                                          |
| AWRIv2 AWRI_4108       | reductase [NADPH]                                                                                                                                                                                                                                                                                                                                                                                          |
| LAMAP LAMAP2480_1200   | reductase [NAD(P)H], large subunit                                                                                                                                                                                                                                                                                                                                                                         |
| CBS2499v2 CBS2499_5054 | reductase [NAD(P)H], large subunit                                                                                                                                                                                                                                                                                                                                                                         |
| AWRIv2 AWRI_4109       | reductase [NAD(P)H], large subunit                                                                                                                                                                                                                                                                                                                                                                         |
| LAMAP LAMAP2480_1201   | <b>transporter</b>                                                                                                                                                                                                                                                                                                                                                                                         |
| CBS2499v2 CBS2499_5055 | transporter                                                                                                                                                                                                                                                                                                                                                                                                |
| AWRIv2 AWRI_4110       | transporter                                                                                                                                                                                                                                                                                                                                                                                                |
| LAMAP LAMAP2480_1202   | isomaltase (alpha-1,6-glucosidase) required for isomaltose utilization; has specificity for isomaltose, palatinose, and methyl-alpha-glucoside; member of the IMA isomaltase family                                                                                                                                                                                                                        |
| CBS2499v2 CBS2499_5056 | isomaltase (alpha-1,6-glucosidase/alpha-methylglucosidase); required for isomaltose utilization; preferred specificity for isomaltose, alpha-methylglucoside, and palatinose, but also exhibits alpha-1,2 glucosidase activity on sucrose and kojibiose, and can cleave the 1,3-alpha linkage of nigerose and turanose and the alpha-1,5 linkage of leucrose in vitro; member of the IMA isomaltase family |
| AWRIv2 AWRI_4111       | isomaltase (alpha-1,6-glucosidase/alpha-methylglucosidase); required for isomaltose utilization; preferred specificity for isomaltose, alpha-methylglucoside, and palatinose, but also exhibits alpha-1,2 glucosidase activity on sucrose and kojibiose, and can cleave the 1,3-alpha linkage of nigerose and turanose and the alpha-1,5 linkage of leucrose in vitro; member of the IMA isomaltase family |
| LAMAP LAMAP2480_1203   | phosphodiesterase 2                                                                                                                                                                                                                                                                                                                                                                                        |
| CBS2499v2 CBS2499_5057 | phosphodiesterase 2                                                                                                                                                                                                                                                                                                                                                                                        |
| AWRIv2 AWRI_4112       | phosphodiesterase 2                                                                                                                                                                                                                                                                                                                                                                                        |
| LAMAP LAMAP2480_1225   | chaperone required for correct maturation of the 20S proteasome; may inhibit premature dimerization of proteasome half-mers; degraded by proteasome upon completion of its assembly                                                                                                                                                                                                                        |
| CBS2499v2 CBS2499_4205 | required for correct maturation of the 20S proteasome; short-lived chaperone; may inhibit premature dimerization of proteasome half-mers; degraded by proteasome upon completion of its assembly                                                                                                                                                                                                           |
| AWRIv2 AWRI_3062       | required for correct maturation of the 20S proteasome; short-lived chaperone; may inhibit premature dimerization of proteasome half-mers; degraded by proteasome upon completion of its assembly                                                                                                                                                                                                           |
| LAMAP LAMAP2480_1243   | PEP12                                                                                                                                                                                                                                                                                                                                                                                                      |

|                        |                                                                                                                                                                                                                                                                                                                                                                                                   |
|------------------------|---------------------------------------------------------------------------------------------------------------------------------------------------------------------------------------------------------------------------------------------------------------------------------------------------------------------------------------------------------------------------------------------------|
| CBS2499v2 CBS2499_4189 | PEP12                                                                                                                                                                                                                                                                                                                                                                                             |
| AWRIv2 AWRI_3074       | PEP12                                                                                                                                                                                                                                                                                                                                                                                             |
| LAMAP LAMAP2480_1244   | repeat protein involved in assembly of cytosolic and nuclear iron-sulfur proteins; similar to the human Ciao1 protein; YDR267C is an essential gene                                                                                                                                                                                                                                               |
| CBS2499v2 CBS2499_4188 | of cytosolic iron-sulfur protein assembly (CIA) machinery; acts at a late step of Fe-S cluster assembly; forms the CIA targeting complex with Cia2p and Met18p that directs Fe-S cluster incorporation into a subset of proteins involved in methionine biosynthesis, DNA replication and repair, transcription, and telomere maintenance; contains WD40 repeats; ortholog of human Ciao1 protein |
| AWRIv2 AWRI_3075       | of cytosolic iron-sulfur protein assembly (CIA) machinery; acts at a late step of Fe-S cluster assembly; forms the CIA targeting complex with Cia2p and Met18p that directs Fe-S cluster incorporation into a subset of proteins involved in methionine biosynthesis, DNA replication and repair, transcription, and telomere maintenance; contains WD40 repeats; ortholog of human Ciao1 protein |
| LAMAP LAMAP2480_1248   | HIR2                                                                                                                                                                                                                                                                                                                                                                                              |
| CBS2499v2 CBS2499_4184 | hir1                                                                                                                                                                                                                                                                                                                                                                                              |
| AWRIv2 AWRI_3078       | HIR2                                                                                                                                                                                                                                                                                                                                                                                              |
| LAMAP LAMAP2480_1280   | protein _4165                                                                                                                                                                                                                                                                                                                                                                                     |
| CBS2499v2 CBS2499_4155 | protein _4165                                                                                                                                                                                                                                                                                                                                                                                     |
| AWRIv2 AWRI_3469       | protein _4165                                                                                                                                                                                                                                                                                                                                                                                     |
| LAMAP LAMAP2480_1314   | protein _2764                                                                                                                                                                                                                                                                                                                                                                                     |
| CBS2499v2 CBS2499_3305 | protein _2764                                                                                                                                                                                                                                                                                                                                                                                     |
| AWRIv2 AWRI_2309       | protein _2764                                                                                                                                                                                                                                                                                                                                                                                     |
| LAMAP LAMAP2480_1346   | protein sorting-associated protein VTA1 homolog                                                                                                                                                                                                                                                                                                                                                   |
| CBS2499v2 CBS2499_3338 | HOMOLOG OF MAMMALIAN LYST-INTERACTING PROTEIN 5                                                                                                                                                                                                                                                                                                                                                   |
| AWRIv2 AWRI_0186       | HOMOLOG OF MAMMALIAN LYST-INTERACTING PROTEIN 5                                                                                                                                                                                                                                                                                                                                                   |
| LAMAP LAMAP2480_1347   | BNI1                                                                                                                                                                                                                                                                                                                                                                                              |
| CBS2499v2 CBS2499_3339 | BNI1                                                                                                                                                                                                                                                                                                                                                                                              |
| AWRIv2 AWRI_0187       | BNI1                                                                                                                                                                                                                                                                                                                                                                                              |
| LAMAP LAMAP2480_1350   | cysteine protease ATG4                                                                                                                                                                                                                                                                                                                                                                            |
| CBS2499v2 CBS2499_3342 | cysteine protease ATG4                                                                                                                                                                                                                                                                                                                                                                            |
| AWRIv2 AWRI_0190       | cysteine protease ATG4                                                                                                                                                                                                                                                                                                                                                                            |
| LAMAP LAMAP2480_1354   | dehydrogenase                                                                                                                                                                                                                                                                                                                                                                                     |
| CBS2499v2 CBS2499_3346 | dehydrogenase                                                                                                                                                                                                                                                                                                                                                                                     |
| AWRIv2 AWRI_0194       | dehydrogenase                                                                                                                                                                                                                                                                                                                                                                                     |
| LAMAP LAMAP2480_1373   | domain-containing protein FUN19                                                                                                                                                                                                                                                                                                                                                                   |
| CBS2499v2 CBS2499_3914 | domain-containing protein FUN19                                                                                                                                                                                                                                                                                                                                                                   |
| AWRIv2 AWRI_0204       | domain-containing protein FUN19                                                                                                                                                                                                                                                                                                                                                                   |
| LAMAP LAMAP2480_1381   | co-chaperone AHA1                                                                                                                                                                                                                                                                                                                                                                                 |
| CBS2499v2 CBS2499_3922 | that binds Hsp82p and activates its ATPase activity; plays a role in determining prion variants; similar to Hch1p; expression is regulated by stresses such as heat shock; protein abundance increases in response to DNA replication stress                                                                                                                                                      |
| AWRIv2 AWRI_0215       | co-chaperone AHA1                                                                                                                                                                                                                                                                                                                                                                                 |
| LAMAP LAMAP2480_1386   |                                                                                                                                                                                                                                                                                                                                                                                                   |

|                        |                                                                                                                                                                                                                                         |   |
|------------------------|-----------------------------------------------------------------------------------------------------------------------------------------------------------------------------------------------------------------------------------------|---|
| CBS2499v2 CBS2499_5084 |                                                                                                                                                                                                                                         | 3 |
| AWRIv2 AWRI_0219       |                                                                                                                                                                                                                                         | 2 |
| LAMAP LAMAP2480_1387   | protein YLR287C                                                                                                                                                                                                                         |   |
| CBS2499v2 CBS2499_5085 | protein YLR287C                                                                                                                                                                                                                         |   |
| AWRIv2 AWRI_0221       | protein YLR287C                                                                                                                                                                                                                         |   |
| LAMAP LAMAP2480_1394   | complex subunit 2                                                                                                                                                                                                                       |   |
| CBS2499v2 CBS2499_3934 | complex subunit 2                                                                                                                                                                                                                       |   |
| AWRIv2 AWRI_0223       | complex subunit 2                                                                                                                                                                                                                       |   |
| LAMAP LAMAP2480_1401   | <b>resistance MFS transporter, drug:H<sup>+</sup> antiporter-2 (14 Spanner) (DHA2) family</b>                                                                                                                                           |   |
| CBS2499v2 CBS2499_3940 | resistance MFS transporter, drug:H <sup>+</sup> antiporter-2 (14 Spanner) (DHA2) family                                                                                                                                                 |   |
| AWRIv2 AWRI_0229       | resistance MFS transporter, drug:H <sup>+</sup> antiporter-2 (14 Spanner) (DHA2) family                                                                                                                                                 |   |
| LAMAP LAMAP2480_1405   | factor SYF1                                                                                                                                                                                                                             |   |
| CBS2499v2 CBS2499_3944 | factor SYF1                                                                                                                                                                                                                             |   |
| AWRIv2 AWRI_0232       | factor syf1                                                                                                                                                                                                                             |   |
|                        | required, along with Dph1p, Kti11p, Jjj3p, and Dph5p, for synthesis of diphthamide, which is a modified histidine residue of translation elongation factor 2 (Eft1p or Eft2p); may act in a complex with Dph1p and Kti11p               |   |
| LAMAP LAMAP2480_1416   | required for synthesis of diphthamide; required along with Dph1p, Kti11p, Jjj3p, and Dph5p; diphthamide is a modified histidine residue of translation elongation factor 2 (Eft1p or Eft2p); may act in a complex with Dph1p and Kti11p |   |
| CBS2499v2 CBS2499_3954 | required for synthesis of diphthamide; required along with Dph1p, Kti11p, Jjj3p, and Dph5p; diphthamide is a modified histidine residue of translation elongation factor 2 (Eft1p or Eft2p); may act in a complex with Dph1p and Kti11p |   |
| AWRIv2 AWRI_0240       |                                                                                                                                                                                                                                         | 4 |
| LAMAP LAMAP2480_1421   |                                                                                                                                                                                                                                         | 4 |
| CBS2499v2 CBS2499_3959 |                                                                                                                                                                                                                                         |   |
| AWRIv2 AWRI_0247       | protein C1A6.05c                                                                                                                                                                                                                        |   |
|                        | phosphate lyase, regulates intracellular levels of sphingolipid long-chain base phosphates (LCBPs), degrades phosphorylated long chain bases, prefers C16 dihydrosphingosine-1-phosphate as a substrate                                 |   |
| LAMAP LAMAP2480_1429   |                                                                                                                                                                                                                                         |   |
|                        | phosphate lyase; regulates intracellular levels of sphingolipid long-chain base phosphates (LCBPs), degrades phosphorylated long chain bases, prefers C16 dihydrosphingosine-1-phosphate as a substrate                                 |   |
| CBS2499v2 CBS2499_3966 |                                                                                                                                                                                                                                         |   |
|                        | phosphate lyase; regulates intracellular levels of sphingolipid long-chain base phosphates (LCBPs), degrades phosphorylated long chain bases, prefers C16 dihydrosphingosine-1-phosphate as a substrate                                 |   |
| AWRIv2 AWRI_0254       | preferring nucleoside hydrolase                                                                                                                                                                                                         |   |
| LAMAP LAMAP2480_1431   | preferring nucleoside hydrolase                                                                                                                                                                                                         |   |
| CBS2499v2 CBS2499_4993 | preferring nucleoside hydrolase                                                                                                                                                                                                         |   |
| AWRIv2 AWRI_4181       | activator of proteases prtT                                                                                                                                                                                                             |   |
| LAMAP LAMAP2480_1432   | activator of proteases prtT                                                                                                                                                                                                             |   |
| CBS2499v2 CBS2499_4992 | activator of proteases prtT                                                                                                                                                                                                             |   |
| AWRIv2 AWRI_4182       | transcriptional regulatory protein C25B8.11                                                                                                                                                                                             |   |
| LAMAP LAMAP2480_1433   | transcriptional regulatory protein C25B8.11                                                                                                                                                                                             |   |
| CBS2499v2 CBS2499_4991 | transcriptional regulatory protein C25B8.11                                                                                                                                                                                             |   |
| AWRIv2 AWRI_4176       |                                                                                                                                                                                                                                         |   |

|                        |                                                                                                                                                                                                      |
|------------------------|------------------------------------------------------------------------------------------------------------------------------------------------------------------------------------------------------|
| LAMAP LAMAP2480_1434   | <b>b2 (L-lactate cytochrome-c oxidoreductase), component of the mitochondrial intermembrane space, required for lactate utilization; expression is repressed by glucose and anaerobic conditions</b> |
| CBS2499v2 CBS2499_4990 | b2 (L-lactate cytochrome-c oxidoreductase); component of the mitochondrial intermembrane space, required for lactate utilization; expression is repressed by glucose and anaerobic conditions        |
| AWRIv2 AWRI_4175       | b2 (L-lactate cytochrome-c oxidoreductase); component of the mitochondrial intermembrane space, required for lactate utilization; expression is repressed by glucose and anaerobic conditions        |
| LAMAP LAMAP2480_1444   | of the NineTeen Complex (NTC) that contains Prp19p and stabilizes U6 snRNA in catalytic forms of the spliceosome containing U2, U5, and U6 snRNAs                                                    |
| CBS2499v2 CBS2499_1619 | of the NineTeen Complex (NTC); this complex contains Prp19p and stabilizes U6 snRNA in catalytic forms of the spliceosome containing U2, U5, and U6 snRNAs                                           |
| AWRIv2 AWRI_2140       | factor prp46                                                                                                                                                                                         |
| LAMAP LAMAP2480_1445   | protein 3                                                                                                                                                                                            |
| CBS2499v2 CBS2499_1620 | protein 3                                                                                                                                                                                            |
| AWRIv2 AWRI_2141       | protein 3                                                                                                                                                                                            |
| LAMAP LAMAP2480_1454   | protein Mis14/NSL1                                                                                                                                                                                   |
| CBS2499v2 CBS2499_1630 | protein Mis14/NSL1                                                                                                                                                                                   |
| AWRIv2 AWRI_2146       | protein _2565                                                                                                                                                                                        |
| LAMAP LAMAP2480_1463   | MNN2                                                                                                                                                                                                 |
| CBS2499v2 CBS2499_1641 | MNN21                                                                                                                                                                                                |
| AWRIv2 AWRI_2155       | responsible for addition of the first alpha-1,2-linked mannose to form the branches on the mannan backbone                                                                                           |
| LAMAP LAMAP2480_1466   | of oligosaccharides, localizes to an early Golgi compartment                                                                                                                                         |
| CBS2499v2 CBS2499_1645 | oxidoreductase 12 kDa subunit, mitochondrial                                                                                                                                                         |
| AWRIv2 AWRI_2158       | oxidoreductase 12 kDa subunit, mitochondrial                                                                                                                                                         |
| LAMAP LAMAP2480_1468   | <b>permease, required for high-affinity transport of proline; also transports the toxic proline analog azetidine-2-carboxylate (AzC); PUT4 transcription is repressed in ammonia-grown cells</b>     |
| CBS2499v2 CBS2499_1647 | permease; required for high-affinity transport of proline; also transports the toxic proline analog azetidine-2-carboxylate (AzC); PUT4 transcription is repressed in ammonia-grown cells            |
| AWRIv2 AWRI_2160       | permease; required for high-affinity transport of proline; also transports the toxic proline analog azetidine-2-carboxylate (AzC); PUT4 transcription is repressed in ammonia-grown cells            |
| LAMAP LAMAP2480_1469   | protein _2581                                                                                                                                                                                        |
| CBS2499v2 CBS2499_1648 | protein _2581                                                                                                                                                                                        |
| AWRIv2 AWRI_2161       | protein _2581                                                                                                                                                                                        |
| LAMAP LAMAP2480_1481   | protein _2593                                                                                                                                                                                        |
| CBS2499v2 CBS2499_1661 | protein _2593                                                                                                                                                                                        |
| AWRIv2 AWRI_2171       | protein _2593                                                                                                                                                                                        |
| LAMAP LAMAP2480_1500   | metabolite transport protein C1271.09                                                                                                                                                                |
| CBS2499v2 CBS2499_1679 | metabolite transport protein C1271.09                                                                                                                                                                |
| AWRIv2 AWRI_2186       | metabolite transport protein C1271.09                                                                                                                                                                |
| LAMAP LAMAP2480_1503   | regulator MET32                                                                                                                                                                                      |

|                        |                                                                                                   |
|------------------------|---------------------------------------------------------------------------------------------------|
| CBS2499v2 CBS2499_1682 | regulator MET32                                                                                   |
| AWRIv2 AWRI_2189       | regulator MET32                                                                                   |
| LAMAP LAMAP2480_1509   | ferric reductase transmembrane component                                                          |
| CBS2499v2 CBS2499_1687 | ferric reductase transmembrane component                                                          |
| AWRIv2 AWRI_1397       | ferric reductase transmembrane component 8                                                        |
| LAMAP LAMAP2480_1518   | membrane protein YDL133W                                                                          |
| CBS2499v2 CBS2499_1696 | of phospholipase D SRF1                                                                           |
| AWRIv2 AWRI_1403       | of phospholipase D SRF1                                                                           |
| LAMAP LAMAP2480_1538   | enzyme                                                                                            |
| CBS2499v2 CBS2499_1716 | enzyme                                                                                            |
| AWRIv2 AWRI_1417       | domain-containing protein C57A10.08c                                                              |
| LAMAP LAMAP2480_1541   | protein YKR023W                                                                                   |
| CBS2499v2 CBS2499_1719 | protein YKR023W                                                                                   |
| AWRIv2 AWRI_1419       | protein C1A6.01c                                                                                  |
| LAMAP LAMAP2480_1543   | domain-containing protein 3                                                                       |
| CBS2499v2 CBS2499_1721 | domain-containing protein 3                                                                       |
| AWRIv2 AWRI_1421       | domain-containing protein 3                                                                       |
| LAMAP LAMAP2480_1547   | ligase                                                                                            |
| CBS2499v2 CBS2499_1725 | ligase                                                                                            |
| AWRIv2 AWRI_1427       | ligase                                                                                            |
| LAMAP LAMAP2480_1551   | emergence protein 1                                                                               |
| CBS2499v2 CBS2499_1729 | emergence protein 1                                                                               |
| AWRIv2 AWRI_1428       | scd2/ral3                                                                                         |
| LAMAP LAMAP2480_1555   | protein YIL096C                                                                                   |
| CBS2499v2 CBS2499_1733 | rRNA (uridine(2634)-N(3))-methyltransferase                                                       |
|                        | required for m3U2634 methylation of the 25S rRNA; S-adenosylmethionine-dependent; associates with |
|                        | precursors of the 60S ribosomal subunit; predicted to be involved in ribosome biogenesis          |
| AWRIv2 AWRI_1431       | division protein 1                                                                                |
| LAMAP LAMAP2480_1575   | division protein 1                                                                                |
| CBS2499v2 CBS2499_2467 | division protein 1                                                                                |
| AWRIv2 AWRI_4032       | division protein 1                                                                                |
| LAMAP LAMAP2480_1619   | dioxygenase extradiol-like protein                                                                |
| CBS2499v2 CBS2499_2509 | dioxygenase extradiol                                                                             |
| AWRIv2 AWRI_0535       | dioxygenase extradiol-like protein                                                                |
| LAMAP LAMAP2480_1630   | mannosyltransferase                                                                               |
| CBS2499v2 CBS2499_2521 | mannosyltransferase subunit 1                                                                     |
| AWRIv2 AWRI_0543       | mannosyltransferase                                                                               |
| LAMAP LAMAP2480_1635   | endoplasmic reticulum membrane protein YNR021W                                                    |
| CBS2499v2 CBS2499_2525 | endoplasmic reticulum membrane protein YNR021W                                                    |
| AWRIv2 AWRI_0548       | endoplasmic reticulum membrane protein YNR021W                                                    |
| LAMAP LAMAP2480_1648   | phosphatase 2C homolog 3                                                                          |
| CBS2499v2 CBS2499_2539 | phosphatase 2C homolog 3                                                                          |
| AWRIv2 AWRI_0557       | phosphatase 2C homolog 3                                                                          |

|                        |                                                                                                                                                                                                                                                                                                                                                                       |
|------------------------|-----------------------------------------------------------------------------------------------------------------------------------------------------------------------------------------------------------------------------------------------------------------------------------------------------------------------------------------------------------------------|
| LAMAP LAMAP2480_1659   | (PABA) synthase, has similarity to Escherichia coli PABA synthase components PabA and PabB; required for the synthesis of para-aminobenzoic acid, an important intermediate for folate and ubiquinone Q biosynthesis                                                                                                                                                  |
| CBS2499v2 CBS2499_2552 | (PABA) synthase; has similarity to Escherichia coli PABA synthase components PabA and PabB; required for the synthesis of para-aminobenzoic acid, an important intermediate for folate and ubiquinone Q biosynthesis;                                                                                                                                                 |
| AWRIv2 AWRI_0564       | protein abundance increases in response to DNA replication stress                                                                                                                                                                                                                                                                                                     |
| LAMAP LAMAP2480_1662   | amidotransferase of anthranilate synthase or aminodeoxychorismate synthase                                                                                                                                                                                                                                                                                            |
| CBS2499v2 CBS2499_0019 |                                                                                                                                                                                                                                                                                                                                                                       |
| AWRIv2 AWRI_0788       | amidase C550.07                                                                                                                                                                                                                                                                                                                                                       |
| LAMAP LAMAP2480_1666   | N-formyl-4-amino-5-aminomethyl-2-methylpyrimidine deformylase                                                                                                                                                                                                                                                                                                         |
| CBS2499v2 CBS2499_0014 | selenium metabolism hydrolase                                                                                                                                                                                                                                                                                                                                         |
| AWRIv2 AWRI_0785       | metallohydrolase YodQ                                                                                                                                                                                                                                                                                                                                                 |
| LAMAP LAMAP2480_1674   | <b>resistance MFS transporter, drug:H<sup>+</sup> antiporter-2 (14 Spanner) (DHA2) family</b>                                                                                                                                                                                                                                                                         |
| CBS2499v2 CBS2499_4758 | resistance MFS transporter, drug:H <sup>+</sup> antiporter-2 (14 Spanner) (DHA2) family                                                                                                                                                                                                                                                                               |
| AWRIv2 AWRI_0777       | of basic amino acids in the vacuolar membrane                                                                                                                                                                                                                                                                                                                         |
| LAMAP LAMAP2480_1684   | protein _0934                                                                                                                                                                                                                                                                                                                                                         |
| CBS2499v2 CBS2499_4770 | termination factor Rtf2                                                                                                                                                                                                                                                                                                                                               |
| AWRIv2 AWRI_0768       | protein _0934                                                                                                                                                                                                                                                                                                                                                         |
| LAMAP LAMAP2480_1689   | differentiation protein rcd1                                                                                                                                                                                                                                                                                                                                          |
| CBS2499v2 CBS2499_4776 | N-acetyltransferase C550.08                                                                                                                                                                                                                                                                                                                                           |
| AWRIv2 AWRI_0763       | N-acetyltransferase C550.08                                                                                                                                                                                                                                                                                                                                           |
| LAMAP LAMAP2480_1697   |                                                                                                                                                                                                                                                                                                                                                                       |
| CBS2499v2 CBS2499_4783 |                                                                                                                                                                                                                                                                                                                                                                       |
| AWRIv2 AWRI_0760       |                                                                                                                                                                                                                                                                                                                                                                       |
| LAMAP LAMAP2480_1703   | protein _0917                                                                                                                                                                                                                                                                                                                                                         |
| CBS2499v2 CBS2499_4786 | protein _0917                                                                                                                                                                                                                                                                                                                                                         |
| AWRIv2 AWRI_0756       | protein _0917                                                                                                                                                                                                                                                                                                                                                         |
| LAMAP LAMAP2480_1705   | protein _0916                                                                                                                                                                                                                                                                                                                                                         |
| CBS2499v2 CBS2499_4787 | protein JL09_g4631                                                                                                                                                                                                                                                                                                                                                    |
| AWRIv2 AWRI_0755       | protein _0916                                                                                                                                                                                                                                                                                                                                                         |
|                        | with similarity to members of a family of flavodoxin-like proteins; induced by oxidative stress in a Yap1p dependent manner; the authentic, non-tagged protein is detected in highly purified mitochondria in high-throughput studies                                                                                                                                 |
| LAMAP LAMAP2480_1721   | with similarity to a family of flavodoxin-like proteins; induced by oxidative stress in a Yap1p dependent manner; the authentic, non-tagged protein is detected in highly purified mitochondria in high-throughput studies; protein abundance increases in response to DNA replication stress; PST2 has a paralog, RFS1, that arose from the whole genome duplication |
| CBS2499v2 CBS2499_1037 | with similarity to a family of flavodoxin-like proteins; induced by oxidative stress in a Yap1p dependent manner; the authentic, non-tagged protein is detected in highly purified mitochondria in high-throughput studies; protein abundance increases in response to DNA replication stress; PST2 has a paralog, RFS1, that arose from the whole genome duplication |
| AWRIv2 AWRI_0652       | inheritance of mitochondria protein 3                                                                                                                                                                                                                                                                                                                                 |
| LAMAP LAMAP2480_1739   | inheritance of mitochondria protein 3                                                                                                                                                                                                                                                                                                                                 |
| CBS2499v2 CBS2499_1020 |                                                                                                                                                                                                                                                                                                                                                                       |

|                        |                                                                                                                                                                                                                                                                                        |
|------------------------|----------------------------------------------------------------------------------------------------------------------------------------------------------------------------------------------------------------------------------------------------------------------------------------|
| AWRIv2 AWRI_0666       | inheritance of mitochondria protein 3                                                                                                                                                                                                                                                  |
| LAMAP LAMAP2480_1742   | synthesis regulatory protein                                                                                                                                                                                                                                                           |
| CBS2499v2 CBS2499_1017 | wall biosynthesis/cell cycle regulator smi1                                                                                                                                                                                                                                            |
| AWRIv2 AWRI_0668       | homolog                                                                                                                                                                                                                                                                                |
| LAMAP LAMAP2480_1766   | carboxyl-terminal hydrolase 15                                                                                                                                                                                                                                                         |
|                        | protease involved in protein deubiquitination; catalytic activity regulated by an N-terminal TRAF-like domain and and C-terminal sequences; physically interacts with anaphase-promoting complex/cyclosome (APC/C) activator, Cdh1p; forms a complex with AAA peroxins Pex1p and Pex6p |
| CBS2499v2 CBS2499_0993 |                                                                                                                                                                                                                                                                                        |
|                        | protease involved in protein deubiquitination; catalytic activity regulated by an N-terminal TRAF-like domain and and C-terminal sequences; physically interacts with anaphase-promoting complex/cyclosome (APC/C) activator, Cdh1p; forms a complex with AAA peroxins Pex1p and Pex6p |
| AWRIv2 AWRI_0697       | globin-like protein YNL234W                                                                                                                                                                                                                                                            |
| LAMAP LAMAP2480_1771   | globin-like protein YNL234W                                                                                                                                                                                                                                                            |
| CBS2499v2 CBS2499_0986 | globin-like protein YNL234W                                                                                                                                                                                                                                                            |
| AWRIv2 AWRI_0706       | protein At1g78280                                                                                                                                                                                                                                                                      |
| LAMAP LAMAP2480_1796   | protein At1g78280                                                                                                                                                                                                                                                                      |
| CBS2499v2 CBS2499_2031 | protein At5g06550                                                                                                                                                                                                                                                                      |
| AWRIv2 AWRI_0975       |                                                                                                                                                                                                                                                                                        |
| LAMAP LAMAP2480_1799   |                                                                                                                                                                                                                                                                                        |
| CBS2499v2 CBS2499_2033 |                                                                                                                                                                                                                                                                                        |
| AWRIv2 AWRI_0973       |                                                                                                                                                                                                                                                                                        |
| LAMAP LAMAP2480_1800   | factor                                                                                                                                                                                                                                                                                 |
| CBS2499v2 CBS2499_2034 | factor                                                                                                                                                                                                                                                                                 |
| AWRIv2 AWRI_0972       | factor                                                                                                                                                                                                                                                                                 |
|                        | coactivator, component of the ADA and SAGA transcriptional adaptor/HAT (histone acetyltransferase) complexes                                                                                                                                                                           |
| LAMAP LAMAP2480_1811   | coactivator; component of the ADA and SAGA transcriptional adaptor/HAT (histone acetyltransferase) complexes                                                                                                                                                                           |
| CBS2499v2 CBS2499_5092 | coactivator; component of the ADA and SAGA transcriptional adaptor/HAT (histone acetyltransferase) complexes                                                                                                                                                                           |
| AWRIv2 AWRI_0961       | that stimulates the ATPase activity of the HSP70 protein Ssc1p; involved in protein folding/refolding in the mitochondrial matrix; required for proteolysis of misfolded proteins; member of the HSP40 (DnaJ) family of chaperones                                                     |
| LAMAP LAMAP2480_1824   |                                                                                                                                                                                                                                                                                        |
|                        | that stimulates HSP70 protein Ssc1p ATPase activity; involved in protein folding/refolding in the mitochondrial matrix; required for proteolysis of misfolded proteins; member of the HSP40 (DnaJ) family of chaperones                                                                |
| CBS2499v2 CBS2499_2056 | protein DnaJ                                                                                                                                                                                                                                                                           |
| AWRIv2 AWRI_0948       | protein _1140                                                                                                                                                                                                                                                                          |
| LAMAP LAMAP2480_1831   | protein _1140                                                                                                                                                                                                                                                                          |
| CBS2499v2 CBS2499_2063 | protein _1140                                                                                                                                                                                                                                                                          |
| AWRIv2 AWRI_0941       |                                                                                                                                                                                                                                                                                        |
| LAMAP LAMAP2480_1833   |                                                                                                                                                                                                                                                                                        |

|                        |                                                                                                                                                                                                                                                                                                                                                                                                                                                                               |
|------------------------|-------------------------------------------------------------------------------------------------------------------------------------------------------------------------------------------------------------------------------------------------------------------------------------------------------------------------------------------------------------------------------------------------------------------------------------------------------------------------------|
| CBS2499v2 CBS2499_2065 | thioredoxin; highly conserved oxidoreductase required to maintain the redox homeostasis of the cell, forms the mitochondrial thioredoxin system with Trr2p, redox state is maintained by both Trr2p and Glr1p                                                                                                                                                                                                                                                                 |
| AWRIv2 AWRI_0939       |                                                                                                                                                                                                                                                                                                                                                                                                                                                                               |
| LAMAP LAMAP2480_1845   | protein _1126                                                                                                                                                                                                                                                                                                                                                                                                                                                                 |
| CBS2499v2 CBS2499_2077 | protein _1126                                                                                                                                                                                                                                                                                                                                                                                                                                                                 |
| AWRIv2 AWRI_0927       | protein _1126                                                                                                                                                                                                                                                                                                                                                                                                                                                                 |
|                        | <b>symporter of the plasma membrane; transport activity is dependent on the pH gradient across the membrane; mediates high-affinity uptake of carbon sources lactate, pyuvate, and acetate, and also of the micronutrient selenite, whose structure mimics that of monocarboxylates; expression and localization are tightly regulated, with transcription repression, mRNA degradation, and protein endocytosis and degradation all occurring in the presence of glucose</b> |
| LAMAP LAMAP2480_1857   | symporter of the plasma membrane; transport activity is dependent on the pH gradient across the membrane; mediates high-affinity uptake of carbon sources lactate, pyuvate, and acetate, and also of the micronutrient selenite, whose structure mimics that of monocarboxylates; expression and localization are tightly regulated, with transcription repression, mRNA degradation, and protein endocytosis and degradation all occurring in the presence of glucose        |
| CBS2499v2 CBS2499_2089 | symporter of the plasma membrane; transport activity is dependent on the pH gradient across the membrane; mediates high-affinity uptake of carbon sources lactate, pyuvate, and acetate, and also of the micronutrient selenite, whose structure mimics that of monocarboxylates; expression and localization are tightly regulated, with transcription repression, mRNA degradation, and protein endocytosis and degradation all occurring in the presence of glucose        |
| AWRIv2 AWRI_0919       | protein of unknown function; the authentic, non-tagged protein is detected in highly purified mitochondria in high-throughput studies                                                                                                                                                                                                                                                                                                                                         |
| LAMAP LAMAP2480_1867   | protein of unknown function; the authentic, non-tagged protein is detected in highly purified mitochondria in high-throughput studies                                                                                                                                                                                                                                                                                                                                         |
| CBS2499v2 CBS2499_2099 | protein of unknown function; the authentic, non-tagged protein is detected in highly purified mitochondria in high-throughput studies                                                                                                                                                                                                                                                                                                                                         |
| AWRIv2 AWRI_0909       | WRNIP1                                                                                                                                                                                                                                                                                                                                                                                                                                                                        |
| LAMAP LAMAP2480_1911   | ATPase MGS1                                                                                                                                                                                                                                                                                                                                                                                                                                                                   |
| CBS2499v2 CBS2499_3753 | WRNIP1 homolog C26H5.02c                                                                                                                                                                                                                                                                                                                                                                                                                                                      |
| AWRIv2 AWRI_1149       | app1                                                                                                                                                                                                                                                                                                                                                                                                                                                                          |
| LAMAP LAMAP2480_1916   | protein                                                                                                                                                                                                                                                                                                                                                                                                                                                                       |
| CBS2499v2 CBS2499_3756 | protein                                                                                                                                                                                                                                                                                                                                                                                                                                                                       |
| AWRIv2 AWRI_1147       | protein _1363                                                                                                                                                                                                                                                                                                                                                                                                                                                                 |
| LAMAP LAMAP2480_1926   | protein _1363                                                                                                                                                                                                                                                                                                                                                                                                                                                                 |
| CBS2499v2 CBS2499_3767 | protein _1363                                                                                                                                                                                                                                                                                                                                                                                                                                                                 |
| AWRIv2 AWRI_1139       | protein _1351                                                                                                                                                                                                                                                                                                                                                                                                                                                                 |
| LAMAP LAMAP2480_1939   | protein _1351                                                                                                                                                                                                                                                                                                                                                                                                                                                                 |
| CBS2499v2 CBS2499_3779 | protein _1351                                                                                                                                                                                                                                                                                                                                                                                                                                                                 |
| AWRIv2 AWRI_1127       | polymerase epsilon subunit D                                                                                                                                                                                                                                                                                                                                                                                                                                                  |
| LAMAP LAMAP2480_1946   | polymerase epsilon subunit D                                                                                                                                                                                                                                                                                                                                                                                                                                                  |
| CBS2499v2 CBS2499_3787 | polymerase epsilon subunit D                                                                                                                                                                                                                                                                                                                                                                                                                                                  |
| AWRIv2 AWRI_1119       |                                                                                                                                                                                                                                                                                                                                                                                                                                                                               |

|                        |                                                                                                                                                                                                                                        |
|------------------------|----------------------------------------------------------------------------------------------------------------------------------------------------------------------------------------------------------------------------------------|
| LAMAP LAMAP2480_1948   | involved in negative regulation of transcription of iron regulon; forms an iron independent complex with Fra2p, Grx3p, and Grx4p; cytosolic; mutant fails to repress transcription of iron regulon and is defective in spore formation |
| CBS2499v2 CBS2499_3789 | involved in negative regulation of iron regulon transcription; forms an iron independent complex with Fra2p, Grx3p, and Grx4p; cytosolic; mutant fails to repress transcription of iron regulon and is defective in spore formation    |
| AWRIv2 AWRI_1117       | N-terminal domain                                                                                                                                                                                                                      |
| LAMAP LAMAP2480_1950   | sulfonate dioxygenase                                                                                                                                                                                                                  |
| CBS2499v2 CBS2499_3791 | sulfonate dioxygenase                                                                                                                                                                                                                  |
| AWRIv2 AWRI_1115       | alpha-ketoglutarate-dependent sulfonate dioxygenase                                                                                                                                                                                    |
| LAMAP LAMAP2480_1961   | specificity protein phosphatase PPS1                                                                                                                                                                                                   |
| CBS2499v2 CBS2499_3801 | specificity protein phosphatase PPS1                                                                                                                                                                                                   |
| AWRIv2 AWRI_1106       | specificity protein phosphatase PPS1                                                                                                                                                                                                   |
| LAMAP LAMAP2480_1983   | of serine hydrolases 3                                                                                                                                                                                                                 |
| CBS2499v2 CBS2499_4301 | of serine hydrolases 3                                                                                                                                                                                                                 |
| AWRIv2 AWRI_1560       | cancer-associated gene 2 protein homolog                                                                                                                                                                                               |
| LAMAP LAMAP2480_1993   | protein _1836                                                                                                                                                                                                                          |
| CBS2499v2 CBS2499_4290 | protein _1836                                                                                                                                                                                                                          |
| AWRIv2 AWRI_1552       | protein _1836                                                                                                                                                                                                                          |
| LAMAP LAMAP2480_1994   | specific transcription factor domain                                                                                                                                                                                                   |
| CBS2499v2 CBS2499_4289 | specific transcription factor domain                                                                                                                                                                                                   |
| AWRIv2 AWRI_1551       | specific transcription factor domain                                                                                                                                                                                                   |
| LAMAP LAMAP2480_1996   | keto reductase                                                                                                                                                                                                                         |
| CBS2499v2 CBS2499_4287 | keto reductase                                                                                                                                                                                                                         |
| AWRIv2 AWRI_1550       | keto reductase                                                                                                                                                                                                                         |
| LAMAP LAMAP2480_2015   | protein kinase mpkC                                                                                                                                                                                                                    |
| CBS2499v2 CBS2499_4264 | kinase Bud32                                                                                                                                                                                                                           |
| AWRIv2 AWRI_1533       | kinase 7                                                                                                                                                                                                                               |
| LAMAP LAMAP2480_2021   | deacetylase                                                                                                                                                                                                                            |
| CBS2499v2 CBS2499_4257 | deacetylase                                                                                                                                                                                                                            |
| AWRIv2 AWRI_1529       |                                                                                                                                                                                                                                        |
| LAMAP LAMAP2480_2024   | hydantoinase/carbamoylase family                                                                                                                                                                                                       |
| CBS2499v2 CBS2499_4254 | protein                                                                                                                                                                                                                                |
| AWRIv2 AWRI_1527       | hydantoinase/carbamoylase family                                                                                                                                                                                                       |
| LAMAP LAMAP2480_2029   | permease regulator 3                                                                                                                                                                                                                   |
| CBS2499v2 CBS2499_4251 | permease regulator 3                                                                                                                                                                                                                   |
| AWRIv2 AWRI_1524       | permease regulator 3                                                                                                                                                                                                                   |
| LAMAP LAMAP2480_2037   | protein, YigZ family                                                                                                                                                                                                                   |
| CBS2499v2 CBS2499_4245 | protein, YigZ family                                                                                                                                                                                                                   |
| AWRIv2 AWRI_1517       | protein, YigZ family                                                                                                                                                                                                                   |
| LAMAP LAMAP2480_2038   | phosphatase 5                                                                                                                                                                                                                          |
| CBS2499v2 CBS2499_4244 | phosphatase 5                                                                                                                                                                                                                          |
| AWRIv2 AWRI_1516       | phosphatase 5                                                                                                                                                                                                                          |
| LAMAP LAMAP2480_2041   | protein C132.01c                                                                                                                                                                                                                       |

|                        |                                                                                                                                                                                                                                                                                                                                                                                                                                                                         |
|------------------------|-------------------------------------------------------------------------------------------------------------------------------------------------------------------------------------------------------------------------------------------------------------------------------------------------------------------------------------------------------------------------------------------------------------------------------------------------------------------------|
| CBS2499v2 CBS2499_4241 | export mediator factor NEMF homolog                                                                                                                                                                                                                                                                                                                                                                                                                                     |
| AWRIv2 AWRI_1513       | export mediator factor NEMF homolog                                                                                                                                                                                                                                                                                                                                                                                                                                     |
| LAMAP LAMAP2480_2044   | family                                                                                                                                                                                                                                                                                                                                                                                                                                                                  |
| CBS2499v2 CBS2499_4239 | family                                                                                                                                                                                                                                                                                                                                                                                                                                                                  |
| AWRIv2 AWRI_1511       | family                                                                                                                                                                                                                                                                                                                                                                                                                                                                  |
| LAMAP LAMAP2480_2045   | <b>transporter, sugar porter (SP) family</b>                                                                                                                                                                                                                                                                                                                                                                                                                            |
| CBS2499v2 CBS2499_4238 | transporter, sugar porter (SP) family                                                                                                                                                                                                                                                                                                                                                                                                                                   |
| AWRIv2 AWRI_1510       | transporter, sugar porter (SP) family                                                                                                                                                                                                                                                                                                                                                                                                                                   |
| LAMAP LAMAP2480_2046   | protease 1                                                                                                                                                                                                                                                                                                                                                                                                                                                              |
| CBS2499v2 CBS2499_4237 | protease 1                                                                                                                                                                                                                                                                                                                                                                                                                                                              |
| AWRIv2 AWRI_1509       | protease 1                                                                                                                                                                                                                                                                                                                                                                                                                                                              |
| LAMAP LAMAP2480_2047   | protein YPP1                                                                                                                                                                                                                                                                                                                                                                                                                                                            |
| CBS2499v2 CBS2499_4236 | protein YPP1                                                                                                                                                                                                                                                                                                                                                                                                                                                            |
| AWRIv2 AWRI_1507       | protein YPP1                                                                                                                                                                                                                                                                                                                                                                                                                                                            |
| LAMAP LAMAP2480_2050   | protein _1784                                                                                                                                                                                                                                                                                                                                                                                                                                                           |
| CBS2499v2 CBS2499_4235 | protein _1784                                                                                                                                                                                                                                                                                                                                                                                                                                                           |
| AWRIv2 AWRI_1506       | protein _1784                                                                                                                                                                                                                                                                                                                                                                                                                                                           |
| LAMAP LAMAP2480_2052   | polymerase epsilon subunit C                                                                                                                                                                                                                                                                                                                                                                                                                                            |
| CBS2499v2 CBS2499_4233 | polymerase epsilon subunit C                                                                                                                                                                                                                                                                                                                                                                                                                                            |
| AWRIv2 AWRI_1504       | polymerase epsilon subunit C                                                                                                                                                                                                                                                                                                                                                                                                                                            |
| LAMAP LAMAP2480_2054   | assembly chaperone 2                                                                                                                                                                                                                                                                                                                                                                                                                                                    |
| CBS2499v2 CBS2499_4231 | assembly chaperone 2                                                                                                                                                                                                                                                                                                                                                                                                                                                    |
| AWRIv2 AWRI_1502       | assembly chaperone 2                                                                                                                                                                                                                                                                                                                                                                                                                                                    |
| LAMAP LAMAP2480_2055   | domain                                                                                                                                                                                                                                                                                                                                                                                                                                                                  |
| CBS2499v2 CBS2499_4230 | protein STP22 of temperature-sensitive alpha-factor receptor and arginine permease                                                                                                                                                                                                                                                                                                                                                                                      |
| AWRIv2 AWRI_1501       | protein STP22 of temperature-sensitive alpha-factor receptor and arginine permease                                                                                                                                                                                                                                                                                                                                                                                      |
| LAMAP LAMAP2480_2059   | organelle assembly protein TopJ                                                                                                                                                                                                                                                                                                                                                                                                                                         |
| CBS2499v2 CBS2499_4225 | organelle assembly protein TopJ                                                                                                                                                                                                                                                                                                                                                                                                                                         |
|                        | II HSP40 co-chaperone that interacts with the HSP70 protein Ssa1p; shuttles between cytosol and nucleus; mediates delivery of misfolded proteins into the nucleus for degradation; involved in proteasomal degradation of misfolded cytosolic proteins; protein abundance increases in response to DNA replication stress; polyQ aggregates sequester Sis1p and interfere with clearance of misfolded proteins; similar to bacterial DnaJ proteins and mammalian DnaJB1 |
| AWRIv2 AWRI_1497       | amidolyase, contains both urea carboxylase and allophanate hydrolase activities, degrades urea to CO <sub>2</sub> and NH <sub>3</sub> ; expression sensitive to nitrogen catabolite repression and induced by allophanate, an intermediate in allantoin degradation                                                                                                                                                                                                     |
| LAMAP LAMAP2480_2061   |                                                                                                                                                                                                                                                                                                                                                                                                                                                                         |
|                        | amidolyase; contains both urea carboxylase and allophanate hydrolase activities, degrades urea to CO <sub>2</sub> and NH <sub>3</sub> ; expression sensitive to nitrogen catabolite repression and induced by allophanate, an intermediate in allantoin degradation; protein abundance increases in response to DNA replication stress                                                                                                                                  |
| CBS2499v2 CBS2499_5012 |                                                                                                                                                                                                                                                                                                                                                                                                                                                                         |
|                        | amidolyase; contains both urea carboxylase and allophanate hydrolase activities, degrades urea to CO <sub>2</sub> and NH <sub>3</sub> ; expression sensitive to nitrogen catabolite repression and induced by allophanate, an intermediate in allantoin degradation; protein abundance increases in response to DNA replication stress                                                                                                                                  |
| AWRIv2 AWRI_1493       |                                                                                                                                                                                                                                                                                                                                                                                                                                                                         |

|                        |                                                                                                              |    |
|------------------------|--------------------------------------------------------------------------------------------------------------|----|
| LAMAP LAMAP2480_2062   | protein PYRAB09930                                                                                           |    |
| CBS2499v2 CBS2499_5011 | utilization protein lamB                                                                                     |    |
| AWRIv2 AWRI_1492       | protein SE_1287                                                                                              |    |
| LAMAP LAMAP2480_2063   | <b>solute:sodium symporter (SSS) family</b>                                                                  |    |
| CBS2499v2 CBS2499_5010 | solute:sodium symporter (SSS) family                                                                         |    |
| AWRIv2 AWRI_1491       | urea active transporter 1                                                                                    |    |
| LAMAP LAMAP2480_2064   |                                                                                                              | 20 |
| CBS2499v2 CBS2499_5009 |                                                                                                              | 20 |
| AWRIv2 AWRI_1490       |                                                                                                              | 20 |
| LAMAP LAMAP2480_2067   | protein _1768                                                                                                |    |
| CBS2499v2 CBS2499_5007 | protein _1768                                                                                                |    |
| AWRIv2 AWRI_1488       | protein _1768                                                                                                |    |
| LAMAP LAMAP2480_2068   | protein _1766                                                                                                |    |
| CBS2499v2 CBS2499_5006 | protein _1766                                                                                                |    |
| AWRIv2 AWRI_1487       | protein _1766                                                                                                |    |
| LAMAP LAMAP2480_2069   | <b>zinc transporter</b>                                                                                      |    |
| CBS2499v2 CBS2499_5005 | transporter ZIP9                                                                                             |    |
| AWRIv2 AWRI_1486       | transporter ZIP9                                                                                             |    |
| LAMAP LAMAP2480_2070   | <b>secreted protein</b>                                                                                      |    |
| CBS2499v2 CBS2499_5003 | secreted protein                                                                                             |    |
| AWRIv2 AWRI_1485       | secreted protein                                                                                             |    |
| LAMAP LAMAP2480_2071   | 5-kinase FAB1                                                                                                |    |
| CBS2499v2 CBS2499_5002 | 3-phosphate 5-kinase FAB1                                                                                    |    |
| AWRIv2 AWRI_1484       | 3-phosphate 5-kinase FAB1                                                                                    |    |
| LAMAP LAMAP2480_2072   | affecting a late Golgi compartment protein 2                                                                 |    |
| CBS2499v2 CBS2499_5001 | affecting a late Golgi compartment protein 2                                                                 |    |
| AWRIv2 AWRI_1482       | affecting a late Golgi compartment protein 2                                                                 |    |
| LAMAP LAMAP2480_2073   | membrane protein YOL019W                                                                                     |    |
| CBS2499v2 CBS2499_5000 | membrane protein YOL019W                                                                                     |    |
| AWRIv2 AWRI_1481       | membrane protein YOL019W                                                                                     |    |
| LAMAP LAMAP2480_2075   | protein _1758                                                                                                |    |
| CBS2499v2 CBS2499_4998 | protein _1758                                                                                                |    |
| AWRIv2 AWRI_1479       | protein _1758                                                                                                |    |
| LAMAP LAMAP2480_2077   | <b>transporter, sugar porter (SP) family</b>                                                                 |    |
| CBS2499v2 CBS2499_4994 | transporter, sugar porter (SP) family                                                                        |    |
| AWRIv2 AWRI_1475       | transporter, sugar porter (SP) family                                                                        |    |
| LAMAP LAMAP2480_2085   | protein MSB1                                                                                                 |    |
| CBS2499v2 CBS2499_4325 | protein MSB1                                                                                                 |    |
| AWRIv2 AWRI_2609       | protein MSB1                                                                                                 |    |
| LAMAP LAMAP2480_2089   | domain and RING finger protein YDR266C                                                                       |    |
| CBS2499v2 CBS2499_4329 | ubiquitin-protein ligase HEL2                                                                                |    |
| AWRIv2 AWRI_2607       | ubiquitin-protein ligase HEL2                                                                                |    |
|                        | acetate-hydrolyzing esterase, required in balance with alcohol acetyltransferase to maintain optimal amounts |    |
|                        | of isoamyl acetate, which is particularly important in sake brewing                                          |    |
| LAMAP LAMAP2480_2116   |                                                                                                              |    |

|                        |                                                                                                                                                                                                                                                                                                                                                                                                                                                           |
|------------------------|-----------------------------------------------------------------------------------------------------------------------------------------------------------------------------------------------------------------------------------------------------------------------------------------------------------------------------------------------------------------------------------------------------------------------------------------------------------|
| CBS2499v2 CBS2499_4355 | acetate-hydrolyzing esterase; required in balance with alcohol acetyltransferase to maintain optimal amounts of isoamyl acetate, which is particularly important in sake brewing                                                                                                                                                                                                                                                                          |
| AWRIv2 AWRI_2581       | acetate-hydrolyzing esterase                                                                                                                                                                                                                                                                                                                                                                                                                              |
| LAMAP LAMAP2480_2147   | protein REB1                                                                                                                                                                                                                                                                                                                                                                                                                                              |
| CBS2499v2 CBS2499_4847 | protein REB1                                                                                                                                                                                                                                                                                                                                                                                                                                              |
| AWRIv2 AWRI_3415       | protein _4094                                                                                                                                                                                                                                                                                                                                                                                                                                             |
| LAMAP LAMAP2480_2152   | domain-containing protein C1B9.03c                                                                                                                                                                                                                                                                                                                                                                                                                        |
| CBS2499v2 CBS2499_4842 | of 66S pre-ribosomal particles; required for ribosomal large subunit maturation; functionally redundant with Ssf2p; member of the Brix family; SSF1 has a paralog, SSF2, that arose from the whole genome duplication                                                                                                                                                                                                                                     |
| AWRIv2 AWRI_3411       | biogenesis protein SSF2                                                                                                                                                                                                                                                                                                                                                                                                                                   |
| LAMAP LAMAP2480_2207   | amidotransferase, A subunit                                                                                                                                                                                                                                                                                                                                                                                                                               |
| CBS2499v2 CBS2499_4296 | amidotransferase, A subunit                                                                                                                                                                                                                                                                                                                                                                                                                               |
| AWRIv2 AWRI_1557       | amidotransferase subunit A, mitochondrial                                                                                                                                                                                                                                                                                                                                                                                                                 |
| LAMAP LAMAP2480_2210   | protein of unknown function; non-tagged protein is detected in purified mitochondria; may interact with respiratory chain complex IV; null mutant is viable and displays reduced frequency of mitochondrial genome loss                                                                                                                                                                                                                                   |
| CBS2499v2 CBS2499_4295 | c oxidase subunit; has a role in assembly of respiratory supercomplexes; similar to Rcf1p, and either Rcf1p or Rcf2p is required for late-stage assembly of the Cox12p and Cox13p subunits and for cytochrome c oxidase activity; associates with the cytochrome c oxidase - cytochrome bc1 supercomplex; null mutant accumulates reactive oxygen species; member of the conserved hypoxia induced gene family; C. elegans homolog is functional in yeast |
| AWRIv2 AWRI_1556       | c oxidase subunit; has a role in assembly of respiratory supercomplexes; similar to Rcf1p, and either Rcf1p or Rcf2p is required for late-stage assembly of the Cox12p and Cox13p subunits and for cytochrome c oxidase activity; associates with the cytochrome c oxidase - cytochrome bc1 supercomplex; null mutant accumulates reactive oxygen species; member of the conserved hypoxia induced gene family; C. elegans homolog is functional in yeast |
| LAMAP LAMAP2480_2213   | nucleosidase                                                                                                                                                                                                                                                                                                                                                                                                                                              |
| CBS2499v2 CBS2499_4292 | nucleosidase (uridine-cytidine N-ribohydrolase); cleaves N-glycosidic bonds in nucleosides; involved in the pyrimidine salvage and nicotinamide riboside salvage pathways                                                                                                                                                                                                                                                                                 |
| AWRIv2 AWRI_1553       | nucleosidase                                                                                                                                                                                                                                                                                                                                                                                                                                              |
| LAMAP LAMAP2480_2247   | MNN4                                                                                                                                                                                                                                                                                                                                                                                                                                                      |
| CBS2499v2 CBS2499_4253 | protein YJR061W                                                                                                                                                                                                                                                                                                                                                                                                                                           |
| AWRIv2 AWRI_1526       | MNN4                                                                                                                                                                                                                                                                                                                                                                                                                                                      |
| LAMAP LAMAP2480_2248   | protein _1804                                                                                                                                                                                                                                                                                                                                                                                                                                             |
| CBS2499v2 CBS2499_4252 | protein _1804                                                                                                                                                                                                                                                                                                                                                                                                                                             |
| AWRIv2 AWRI_1525       | protein _1804                                                                                                                                                                                                                                                                                                                                                                                                                                             |
| LAMAP LAMAP2480_2290   | FAM63A                                                                                                                                                                                                                                                                                                                                                                                                                                                    |
| CBS2499v2 CBS2499_3164 | protein YPL191C                                                                                                                                                                                                                                                                                                                                                                                                                                           |
| AWRIv2 AWRI_3564       | protein YPL191C                                                                                                                                                                                                                                                                                                                                                                                                                                           |
| LAMAP LAMAP2480_2295   | oxidase required for oxidative protein folding in the endoplasmic reticulum                                                                                                                                                                                                                                                                                                                                                                               |

|                        |                                                                                                                                                                                                                                                                                                                                                                                                                                                                               |
|------------------------|-------------------------------------------------------------------------------------------------------------------------------------------------------------------------------------------------------------------------------------------------------------------------------------------------------------------------------------------------------------------------------------------------------------------------------------------------------------------------------|
| CBS2499v2 CBS2499_3159 | oxidase required for oxidative protein folding in the ER; essential for maintaining proper redox balance in ER; feedback regulation of Ero1p occurs via reduction and oxidation of Ero1p regulatory bonds; reduced Pdi1p activates Ero1p by direct reduction of Ero1p regulatory bonds; depletion of thiol substrates and accumulation of oxidized Pdi1p results in inactivation of Ero1p by both Pdi1p-mediated oxidation and autonomous oxidation of Ero1p regulatory bonds |
| AWRIv2 AWRI_3559       | oxidase required for oxidative protein folding in the ER; essential for maintaining proper redox balance in ER; feedback regulation of Ero1p occurs via reduction and oxidation of Ero1p regulatory bonds; reduced Pdi1p activates Ero1p by direct reduction of Ero1p regulatory bonds; depletion of thiol substrates and accumulation of oxidized Pdi1p results in inactivation of Ero1p by both Pdi1p-mediated oxidation and autonomous oxidation of Ero1p regulatory bonds |
| LAMAP LAMAP2480_2304   | WD repeat-containing protein C227.12                                                                                                                                                                                                                                                                                                                                                                                                                                          |
| CBS2499v2 CBS2499_3151 | WD repeat-containing protein C227.12                                                                                                                                                                                                                                                                                                                                                                                                                                          |
| AWRIv2 AWRI_3549       | WD repeat-containing protein C227.12                                                                                                                                                                                                                                                                                                                                                                                                                                          |
| LAMAP LAMAP2480_2306   | complex subunit 3                                                                                                                                                                                                                                                                                                                                                                                                                                                             |
| CBS2499v2 CBS2499_3149 | complex subunit 3                                                                                                                                                                                                                                                                                                                                                                                                                                                             |
| AWRIv2 AWRI_3547       | of the HDA1 histone deacetylase complex; possibly tetrameric trichostatin A-sensitive class II histone deacetylase complex contains Hda1p homodimer and an Hda2p-Hda3p heterodimer; required for the activity of the complex; relocates to the cytosol in response to hypoxia; similar to Hda2p                                                                                                                                                                               |
| LAMAP LAMAP2480_2319   | binding domain of Hap4 for binding to Hap2/3/5                                                                                                                                                                                                                                                                                                                                                                                                                                |
| CBS2499v2 CBS2499_3134 | protein _4457                                                                                                                                                                                                                                                                                                                                                                                                                                                                 |
| AWRIv2 AWRI_3730       | binding domain of Hap4 for binding to Hap2/3/5                                                                                                                                                                                                                                                                                                                                                                                                                                |
| LAMAP LAMAP2480_2321   | aminotransferase C1771.03c                                                                                                                                                                                                                                                                                                                                                                                                                                                    |
| CBS2499v2 CBS2499_3132 | aminotransferase C1771.03c                                                                                                                                                                                                                                                                                                                                                                                                                                                    |
| AWRIv2 AWRI_3734       | aminotransferase C1771.03c                                                                                                                                                                                                                                                                                                                                                                                                                                                    |
| LAMAP LAMAP2480_2357   | and RNase II family 3'-5' exoribonucleases                                                                                                                                                                                                                                                                                                                                                                                                                                    |
| CBS2499v2 CBS2499_1183 | and RNase II family 3'-5' exoribonucleases                                                                                                                                                                                                                                                                                                                                                                                                                                    |
| AWRIv2 AWRI_2573       | II, mitochondrial                                                                                                                                                                                                                                                                                                                                                                                                                                                             |
| LAMAP LAMAP2480_2361   | protein 1                                                                                                                                                                                                                                                                                                                                                                                                                                                                     |
| CBS2499v2 CBS2499_1187 | protein 1                                                                                                                                                                                                                                                                                                                                                                                                                                                                     |
| AWRIv2 AWRI_2570       | protein 1                                                                                                                                                                                                                                                                                                                                                                                                                                                                     |
| LAMAP LAMAP2480_2365   | protein _3106                                                                                                                                                                                                                                                                                                                                                                                                                                                                 |
| CBS2499v2 CBS2499_1173 | protein _3106                                                                                                                                                                                                                                                                                                                                                                                                                                                                 |
| AWRIv2 AWRI_2579       | protein _3106                                                                                                                                                                                                                                                                                                                                                                                                                                                                 |
| LAMAP LAMAP2480_2366   | regulator CRZ1                                                                                                                                                                                                                                                                                                                                                                                                                                                                |
| CBS2499v2 CBS2499_1172 | regulator CRZ1                                                                                                                                                                                                                                                                                                                                                                                                                                                                |
| AWRIv2 AWRI_4183       | regulator CRZ1                                                                                                                                                                                                                                                                                                                                                                                                                                                                |
| LAMAP LAMAP2480_2373   | <b>alpha of assimilatory sulfite reductase, which converts sulfite into sulfide</b>                                                                                                                                                                                                                                                                                                                                                                                           |
| CBS2499v2 CBS2499_1164 | alpha of assimilatory sulfite reductase; complex converts sulfite into sulfide                                                                                                                                                                                                                                                                                                                                                                                                |
| AWRIv2 AWRI_2450       | reductase [NADPH] flavoprotein component                                                                                                                                                                                                                                                                                                                                                                                                                                      |
| LAMAP LAMAP2480_2386   | protein insertase, YidC/Oxa1 family                                                                                                                                                                                                                                                                                                                                                                                                                                           |

|                        |                                                                                                                                                                                                                                                                                                                                                                          |
|------------------------|--------------------------------------------------------------------------------------------------------------------------------------------------------------------------------------------------------------------------------------------------------------------------------------------------------------------------------------------------------------------------|
| CBS2499v2 CBS2499_1152 | inner membrane insertase; mediates the insertion of both mitochondrial- and nuclear-encoded proteins from the matrix into the inner membrane; also has a role in insertion of carrier proteins into the inner membrane; acts as a voltage-gated ion channel, activated by substrate peptides; interacts with mitochondrial ribosomes; conserved from bacteria to animals |
| AWRIv2 AWRI_2461       | inner membrane insertase; mediates the insertion of both mitochondrial- and nuclear-encoded proteins from the matrix into the inner membrane; also has a role in insertion of carrier proteins into the inner membrane; acts as a voltage-gated ion channel, activated by substrate peptides; interacts with mitochondrial ribosomes; conserved from bacteria to animals |
| LAMAP LAMAP2480_2388   | snRNP component ist3                                                                                                                                                                                                                                                                                                                                                     |
| CBS2499v2 CBS2499_1150 | snRNP component ist3                                                                                                                                                                                                                                                                                                                                                     |
| AWRIv2 AWRI_2463       | snRNP component ist3                                                                                                                                                                                                                                                                                                                                                     |
| LAMAP LAMAP2480_2394   | DCR2                                                                                                                                                                                                                                                                                                                                                                     |
|                        | involved in downregulation of the unfolded protein response (UPR), at least in part via dephosphorylation of Ire1p; dosage-dependent positive regulator of the G1/S phase transition through control of the timing of START                                                                                                                                              |
| CBS2499v2 CBS2499_1144 | protein C1020.05                                                                                                                                                                                                                                                                                                                                                         |
| AWRIv2 AWRI_2469       | protein 3                                                                                                                                                                                                                                                                                                                                                                |
| LAMAP LAMAP2480_2403   | protein 3                                                                                                                                                                                                                                                                                                                                                                |
| CBS2499v2 CBS2499_1136 | homolog spn4                                                                                                                                                                                                                                                                                                                                                             |
| AWRIv2 AWRI_2472       | inducibility protein 3                                                                                                                                                                                                                                                                                                                                                   |
| LAMAP LAMAP2480_2432   | inducibility protein 3                                                                                                                                                                                                                                                                                                                                                   |
| CBS2499v2 CBS2499_3546 | inducibility protein 3                                                                                                                                                                                                                                                                                                                                                   |
| AWRIv2 AWRI_3896       | involved in cell wall beta-glucan assembly; null mutation leads to severe growth defects, aberrant multibudded morphology, and mating defects                                                                                                                                                                                                                            |
| LAMAP LAMAP2480_2441   | involved in cell wall beta-glucan assembly; null mutation leads to severe growth defects, aberrant multibudded morphology, and mating defects                                                                                                                                                                                                                            |
| CBS2499v2 CBS2499_3554 | involved in cell wall beta-glucan assembly; null mutation leads to severe growth defects, aberrant multibudded morphology, and mating defects                                                                                                                                                                                                                            |
| AWRIv2 AWRI_3901       | involved in cell wall beta-glucan assembly; null mutation leads to severe growth defects, aberrant multibudded morphology, and mating defects                                                                                                                                                                                                                            |
| LAMAP LAMAP2480_2453   | <b>shock protein 26</b>                                                                                                                                                                                                                                                                                                                                                  |
|                        | heat shock protein (sHSP) with chaperone activity; forms hollow, sphere-shaped oligomers that suppress unfolded proteins aggregation; long-lived protein that is preferentially retained in mother cells and forms cytoplasmic foci; oligomer activation requires heat-induced conformational change; also has mRNA binding activity                                     |
| CBS2499v2 CBS2499_3570 | shock protein 26                                                                                                                                                                                                                                                                                                                                                         |
| AWRIv2 AWRI_3912       | DNA-binding domain                                                                                                                                                                                                                                                                                                                                                       |
| LAMAP LAMAP2480_2455   | regulator of yeast form adherence 6                                                                                                                                                                                                                                                                                                                                      |
| CBS2499v2 CBS2499_3572 | regulator of yeast form adherence 6                                                                                                                                                                                                                                                                                                                                      |
| AWRIv2 AWRI_4157       | maintenance of chromosomes protein 4                                                                                                                                                                                                                                                                                                                                     |
| LAMAP LAMAP2480_2461   | maintenance of chromosomes protein 4                                                                                                                                                                                                                                                                                                                                     |
| CBS2499v2 CBS2499_3584 | maintenance of chromosomes protein 4                                                                                                                                                                                                                                                                                                                                     |
| AWRIv2 AWRI_2720       | kinase 1                                                                                                                                                                                                                                                                                                                                                                 |
| LAMAP LAMAP2480_2466   | kinase 1                                                                                                                                                                                                                                                                                                                                                                 |
| CBS2499v2 CBS2499_3590 | kinase ssp1                                                                                                                                                                                                                                                                                                                                                              |
| AWRIv2 AWRI_2716       |                                                                                                                                                                                                                                                                                                                                                                          |

|                        |                                                                                                                                                                                                                                                              |
|------------------------|--------------------------------------------------------------------------------------------------------------------------------------------------------------------------------------------------------------------------------------------------------------|
| LAMAP LAMAP2480_2479   | subunit (145 kDa), involved in RNA polymerase II transcription initiation; possesses in vitro histone acetyltransferase activity but its role in vivo appears to be minor; involved in promoter binding and G1/S progression                                 |
| CBS2499v2 CBS2499_3625 | subunit, involved in RNA pol II transcription initiation; possesses in vitro histone acetyltransferase activity but its role in vivo appears to be minor; involved in promoter binding and G1/S progression; relocates to the cytosol in response to hypoxia |
| AWRIv2 AWRI_2683       | initiation factor TFIID subunit 1                                                                                                                                                                                                                            |
| LAMAP LAMAP2480_2484   | repeat-containing protein 40                                                                                                                                                                                                                                 |
| CBS2499v2 CBS2499_3630 | repeat-containing protein 58                                                                                                                                                                                                                                 |
| AWRIv2 AWRI_2679       | protein _3222                                                                                                                                                                                                                                                |
| LAMAP LAMAP2480_2491   | site selection protein RAX2                                                                                                                                                                                                                                  |
| CBS2499v2 CBS2499_3636 | site selection protein RAX2                                                                                                                                                                                                                                  |
| AWRIv2 AWRI_1761       | site selection protein RAX2                                                                                                                                                                                                                                  |
| LAMAP LAMAP2480_2501   | N-lysine methyltransferase 1                                                                                                                                                                                                                                 |
| CBS2499v2 CBS2499_3645 | lysine N-methyltransferase 1                                                                                                                                                                                                                                 |
| AWRIv2 AWRI_1769       | lysine N-methyltransferase 1                                                                                                                                                                                                                                 |
| LAMAP LAMAP2480_2504   | non-catalytic core component; involved in 3'-5' RNA processing and degradation in both the nucleus and the cytoplasm; has similarity to E. coli RNase PH and to human hRrp42p (EXOSC7)                                                                       |
| CBS2499v2 CBS2499_3648 | non-catalytic core component; involved in 3'-5' RNA processing and degradation in both the nucleus and the cytoplasm; has similarity to E. coli RNase PH and to human hRrp42p (EXOSC7)                                                                       |
| AWRIv2 AWRI_1771       | non-catalytic core component; involved in 3'-5' RNA processing and degradation in both the nucleus and the cytoplasm; has similarity to E. coli RNase PH and to human hRrp42p (EXOSC7)                                                                       |
| LAMAP LAMAP2480_2524   | trafficking adapter 3                                                                                                                                                                                                                                        |
| CBS2499v2 CBS2499_1030 | trafficking adapter 3                                                                                                                                                                                                                                        |
| AWRIv2 AWRI_0659       | trafficking adapter 3                                                                                                                                                                                                                                        |
| LAMAP LAMAP2480_2531   | ligase, required for tRNA splicing and for both splicing and translation of HAC1 mRNA in the UPR; has phosphodiesterase, polynucleotide kinase, and ligase activities; localized at the inner nuclear envelope and partially to polysomes                    |
| CBS2499v2 CBS2499_1024 | ligase; required for tRNA splicing and for both splicing and translation of HAC1 mRNA in the UPR; has phosphodiesterase, polynucleotide kinase, and ligase activities; localized at the inner nuclear envelope and partially to polysomes                    |
| AWRIv2 AWRI_0664       | ligase; required for tRNA splicing and for both splicing and translation of HAC1 mRNA in the UPR; has phosphodiesterase, polynucleotide kinase, and ligase activities; localized at the inner nuclear envelope and partially to polysomes                    |
| LAMAP LAMAP2480_2536   | kinase and DNA damage checkpoint effector, mediates cell cycle arrest via phosphorylation of Pds1p; phosphorylated by checkpoint signal transducer Mec1p; homolog of S. pombe and mammalian Chk1 checkpoint kinase                                           |
| CBS2499v2 CBS2499_1019 | kinase and DNA damage checkpoint effector; mediates cell cycle arrest via phosphorylation of Pds1p; phosphorylated by checkpoint signal transducer Mec1p; homolog of S. pombe and mammalian Chk1 checkpoint kinase                                           |
| AWRIv2 AWRI_0667       | kinase and DNA damage checkpoint effector; mediates cell cycle arrest via phosphorylation of Pds1p; phosphorylated by checkpoint signal transducer Mec1p; homolog of S. pombe and mammalian Chk1 checkpoint kinase                                           |
| LAMAP LAMAP2480_2545   | IME4                                                                                                                                                                                                                                                         |

CBS2499v2|CBS2499\_1008  
AWRIv2|AWRI\_0677  
LAMAP|LAMAP2480\_2549  
CBS2499v2|CBS2499\_1004  
AWRIv2|AWRI\_0681  
LAMAP|LAMAP2480\_2550  
CBS2499v2|CBS2499\_1003  
AWRIv2|AWRI\_0682  
LAMAP|LAMAP2480\_2554  
CBS2499v2|CBS2499\_5032  
AWRIv2|AWRI\_4184  
  
LAMAP|LAMAP2480\_2555  
  
CBS2499v2|CBS2499\_5033  
  
AWRIv2|AWRI\_4185  
LAMAP|LAMAP2480\_2557  
CBS2499v2|CBS2499\_5035  
AWRIv2|AWRI\_4187  
LAMAP|LAMAP2480\_2582  
CBS2499v2|CBS2499\_4698  
AWRIv2|AWRI\_2403  
LAMAP|LAMAP2480\_2589  
CBS2499v2|CBS2499\_4704  
AWRIv2|AWRI\_2397  
LAMAP|LAMAP2480\_2601  
CBS2499v2|CBS2499\_3136  
AWRIv2|AWRI\_3729  
LAMAP|LAMAP2480\_2613  
CBS2499v2|CBS2499\_3125  
AWRIv2|AWRI\_3742  
LAMAP|LAMAP2480\_2614  
CBS2499v2|CBS2499\_3124  
AWRIv2|AWRI\_3743  
LAMAP|LAMAP2480\_2616  
CBS2499v2|CBS2499\_3122  
AWRIv2|AWRI\_3745  
LAMAP|LAMAP2480\_2626  
CBS2499v2|CBS2499\_3116  
AWRIv2|AWRI\_3750  
LAMAP|LAMAP2480\_2631  
CBS2499v2|CBS2499\_3111  
AWRIv2|AWRI\_1195

IME4  
IME4  
factor GTPase-activating protein GLO3  
factor GTPase-activating protein GLO3  
factor GTPase-activating protein GLO3  
complex subunit 2  
complex subunit 2  
complex subunit 2  
transporter liz1  
transporter liz1  
transporter liz1  
dehydrogenase, oxidizes D-lactate to pyruvate, transcription is heme-dependent, repressed by glucose, and derepressed in ethanol or lactate; located in the mitochondrial inner membrane  
dehydrogenase; oxidizes D-lactate to pyruvate, transcription is heme-dependent, repressed by glucose, and derepressed in ethanol or lactate; located in the mitochondrial inner membrane  
dehydrogenase; oxidizes D-lactate to pyruvate, transcription is heme-dependent, repressed by glucose, and derepressed in ethanol or lactate; located in the mitochondrial inner membrane  
protein y4sH  
protein y4sH  
protein y4sH  
carboxyl-terminal hydrolase 12  
carboxyl-terminal hydrolase 12  
carboxyl-terminal hydrolase 12  
initiation factor TFIID subunit 10  
initiation factor TFIID subunit 10  
initiation factor TFIID subunit 10  
ldg family protein 7  
wall protein RHD3  
wall protein RHD3  
membrane protein PEX29  
membrane protein PEX29  
membrane protein PEX29  
checkpoint protein BUB3  
checkpoint protein BUB3.1  
checkpoint protein BUB3.1  
finger protein C144.02  
complex subunit 1  
complex subunit 1  
transferase 3  
transferase 3  
transferase 3  
oxidase  
oxidase  
oxidase

LAMAP|LAMAP2480\_2643  
CBS2499v2|CBS2499\_3095  
AWRIv2|AWRI\_1208  
LAMAP|LAMAP2480\_2649  
CBS2499v2|CBS2499\_3088  
AWRIv2|AWRI\_1217  
LAMAP|LAMAP2480\_2654  
CBS2499v2|CBS2499\_3083  
AWRIv2|AWRI\_1221  
LAMAP|LAMAP2480\_2660  
CBS2499v2|CBS2499\_3073  
AWRIv2|AWRI\_1228

LAMAP|LAMAP2480\_2663

CBS2499v2|CBS2499\_3069

AWRIv2|AWRI\_1231  
LAMAP|LAMAP2480\_2666  
CBS2499v2|CBS2499\_3064  
AWRIv2|AWRI\_1238  
LAMAP|LAMAP2480\_2668  
CBS2499v2|CBS2499\_3060  
AWRIv2|AWRI\_1242  
LAMAP|LAMAP2480\_2669  
CBS2499v2|CBS2499\_3059  
AWRIv2|AWRI\_1243  
LAMAP|LAMAP2480\_2671  
CBS2499v2|CBS2499\_3056  
AWRIv2|AWRI\_1245

LAMAP|LAMAP2480\_2673  
CBS2499v2|CBS2499\_3052  
AWRIv2|AWRI\_1248  
LAMAP|LAMAP2480\_2675  
CBS2499v2|CBS2499\_3050  
AWRIv2|AWRI\_1250  
LAMAP|LAMAP2480\_2677  
CBS2499v2|CBS2499\_3047  
AWRIv2|AWRI\_1254  
LAMAP|LAMAP2480\_2712  
CBS2499v2|CBS2499\_0748  
AWRIv2|AWRI\_0098  
LAMAP|LAMAP2480\_2713

ubiquitin-protein ligase UBR1  
ubiquitin-protein ligase UBR1  
ubiquitin-protein ligase UBR1  
MNT3

alpha-1,3-mannosyltransferase MNN15  
alpha-1,3-mannosyltransferase MNN14  
protein \_1462  
protein \_1462  
protein \_1462

snRNP component prp10  
snRNP component prp10  
snRNP component prp10

**xylose and arabinose reductase; member of the aldo-keto reductase (AKR) family; GFP-fusion protein is induced in response to the DNA-damaging agent MMS**

and arabinose reductase; member of the aldo-keto reductase (AKR) family; GFP-fusion protein is induced in response to the DNA-damaging agent MMS

and arabinose reductase; member of the aldo-keto reductase (AKR) family; GFP-fusion protein is induced in response to the DNA-damaging agent MMS

transcription activator TEC1  
transcription activator TEC1  
tea atts type DNA binding protein

protein \_1485  
protein HPODL\_00938  
protein \_1485

rna annealing mrna export  
rna annealing mrna export  
rna annealing mrna export  
membrane protein PMP47A  
membrane protein PMP47A  
membrane protein PMP47A

of U3-containing Small Subunit (SSU) processome complex involved in production of 18S rRNA and assembly of small ribosomal subunit

protein C57A7.06  
protein C57A7.06  
protein HPODL\_00947  
protein HPODL\_00947

of six subunits of rna polymerase iii transcription initiation factor complex  
protein involved in pre-rRNA processing; depletion causes severely decreased 18S rRNA levels

protein ESF1  
protein ESF1  
protein C31F10.16  
protein C31F10.16  
protein C31F10.16  
protein SAP190

CBS2499v2|CBS2499\_0747  
AWRIv2|AWRI\_0099  
LAMAP|LAMAP2480\_2725  
CBS2499v2|CBS2499\_0735  
AWRIv2|AWRI\_0106  
LAMAP|LAMAP2480\_2732  
CBS2499v2|CBS2499\_0729  
AWRIv2|AWRI\_0110  
LAMAP|LAMAP2480\_2733  
CBS2499v2|CBS2499\_0728  
AWRIv2|AWRI\_0111  
LAMAP|LAMAP2480\_2734  
CBS2499v2|CBS2499\_0727  
AWRIv2|AWRI\_0112  
LAMAP|LAMAP2480\_2738  
CBS2499v2|CBS2499\_0722  
AWRIv2|AWRI\_0117  
LAMAP|LAMAP2480\_2741  
CBS2499v2|CBS2499\_0719  
AWRIv2|AWRI\_0120  
LAMAP|LAMAP2480\_2751  
CBS2499v2|CBS2499\_0710  
AWRIv2|AWRI\_0130  
LAMAP|LAMAP2480\_2753  
CBS2499v2|CBS2499\_0708  
AWRIv2|AWRI\_0132  
LAMAP|LAMAP2480\_2754  
CBS2499v2|CBS2499\_0707  
AWRIv2|AWRI\_0133  
LAMAP|LAMAP2480\_2765  
CBS2499v2|CBS2499\_1409  
AWRIv2|AWRI\_2010  
LAMAP|LAMAP2480\_2766  
CBS2499v2|CBS2499\_1408  
AWRIv2|AWRI\_2011  
LAMAP|LAMAP2480\_2767  
CBS2499v2|CBS2499\_1407  
AWRIv2|AWRI\_2012  
LAMAP|LAMAP2480\_2768  
CBS2499v2|CBS2499\_1406  
AWRIv2|AWRI\_2013

LAMAP|LAMAP2480\_2780

protein SAP190  
protein SAP190  
N-methyltransferase, H3 lysine-4 specific  
N-methyltransferase, H3 lysine-4 specific  
N-methyltransferase, H3 lysine-4 specific  
protein MAG2  
protein MAG2  
protein MAG2  
mannosyltransferase 1  
mannosyltransferase 1  
mannosyltransferase 1  
of RNA polymerase II transcription subunit 21  
of RNA polymerase II transcription subunit 21  
of RNA polymerase II transcription subunit 21  
protein 2  
protein 2  
protein 2  
atp synthase epsilon chain domain-containing protein  
atp synthase epsilon chain domain-containing protein  
atp synthase epsilon chain domain-containing protein  
specific transcription factor domain  
specific transcription factor domain  
transcription  
domain  
domain  
and polytropic retrovirus receptor 1  
protein \_0157  
protein \_0157  
protein \_0157  
FMP25, mitochondrial  
FMP25, mitochondrial  
FMP25, mitochondrial  
protein \_2408  
protein \_2408  
protein \_2408  
protein \_2409  
protein \_2409  
protein \_2409  
domain-containing protein DEHA2G15708g  
domain-containing protein DEHA2G15708g  
domain-containing protein YALI0D26906g

phosphoribosyl transferase of the tryptophan biosynthetic pathway, catalyzes the phosphoribosylation of  
anthranilate, subject to the general control system of amino acid biosynthesis

|                        |                                                                                                                                                                                                                                  |
|------------------------|----------------------------------------------------------------------------------------------------------------------------------------------------------------------------------------------------------------------------------|
| CBS2499v2 CBS2499_1390 | phosphoribosyl transferase; transferase of the tryptophan biosynthetic pathway; catalyzes the phosphoribosylation of anthranilate; subject to the general control system of amino acid biosynthesis                              |
| AWRIv2 AWRI_2027       | phosphoribosyl transferase; transferase of the tryptophan biosynthetic pathway; catalyzes the phosphoribosylation of anthranilate; subject to the general control system of amino acid biosynthesis                              |
| LAMAP LAMAP2480_2789   | gras liver health family 1                                                                                                                                                                                                       |
| CBS2499v2 CBS2499_1381 | gras liver health family 1                                                                                                                                                                                                       |
| AWRIv2 AWRI_2037       | protein                                                                                                                                                                                                                          |
| LAMAP LAMAP2480_2790   | amino-acid permease C584.13                                                                                                                                                                                                      |
| CBS2499v2 CBS2499_1379 | amino-acid permease C584.13                                                                                                                                                                                                      |
| AWRIv2 AWRI_2038       | amino-acid permease C584.13                                                                                                                                                                                                      |
|                        | matrix iron chaperone; oxidizes and stores iron; interacts with Isu1p to promote Fe-S cluster assembly; mutation results in multiple Fe/S-dependent enzyme deficiencies; human frataxin homolog is mutated in Friedrich's ataxia |
| LAMAP LAMAP2480_2791   | matrix iron chaperone; oxidizes and stores iron; interacts with Isu1p to promote Fe-S cluster assembly; mutation results in multiple Fe/S-dependent enzyme deficiencies; human frataxin homolog is mutated in Friedrich's ataxia |
|                        | donor protein CyaY                                                                                                                                                                                                               |
| CBS2499v2 CBS2499_1378 | protein _2441                                                                                                                                                                                                                    |
| AWRIv2 AWRI_2039       | protein _2441                                                                                                                                                                                                                    |
| LAMAP LAMAP2480_2794   | protein                                                                                                                                                                                                                          |
| CBS2499v2 CBS2499_1375 | esterase TGL1                                                                                                                                                                                                                    |
| AWRIv2 AWRI_2041       | esterase TGL1                                                                                                                                                                                                                    |
| LAMAP LAMAP2480_2795   | esterase TGL1                                                                                                                                                                                                                    |
| CBS2499v2 CBS2499_1374 | protein _2443                                                                                                                                                                                                                    |
| AWRIv2 AWRI_2042       | protein _2443                                                                                                                                                                                                                    |
| LAMAP LAMAP2480_2796   | protein _2443                                                                                                                                                                                                                    |
| CBS2499v2 CBS2499_1373 | protein _2443                                                                                                                                                                                                                    |
| AWRIv2 AWRI_2043       | of ubiquitin conjugation to ER degradation protein 1                                                                                                                                                                             |
| LAMAP LAMAP2480_2798   | of ubiquitin conjugation to ER degradation protein 1                                                                                                                                                                             |
| CBS2499v2 CBS2499_1371 | of ubiquitin conjugation to ER degradation protein 1                                                                                                                                                                             |
| AWRIv2 AWRI_2045       | regulatory protein SAP30                                                                                                                                                                                                         |
| LAMAP LAMAP2480_2799   | regulatory protein SAP30                                                                                                                                                                                                         |
| CBS2499v2 CBS2499_1370 | of a histone deacetylase complex                                                                                                                                                                                                 |
| AWRIv2 AWRI_2046       | 2-reductase                                                                                                                                                                                                                      |
| LAMAP LAMAP2480_2800   | 2-reductase                                                                                                                                                                                                                      |
| CBS2499v2 CBS2499_1369 | 2-reductase                                                                                                                                                                                                                      |
| AWRIv2 AWRI_2047       | 2-reductase                                                                                                                                                                                                                      |
| LAMAP LAMAP2480_2801   | protein _2447                                                                                                                                                                                                                    |
| CBS2499v2 CBS2499_1368 | of G protein signaling domain                                                                                                                                                                                                    |
| AWRIv2 AWRI_2048       | of G protein signaling domain                                                                                                                                                                                                    |
| LAMAP LAMAP2480_2808   | expression activator                                                                                                                                                                                                             |
| CBS2499v2 CBS2499_1362 | wall transcription factor ACE2                                                                                                                                                                                                   |
| AWRIv2 AWRI_2053       | wall transcription factor ACE2                                                                                                                                                                                                   |
| LAMAP LAMAP2480_2821   | protein _2465                                                                                                                                                                                                                    |

|                        |                                                                                                                                                                                             |
|------------------------|---------------------------------------------------------------------------------------------------------------------------------------------------------------------------------------------|
| CBS2499v2 CBS2499_1347 | protein _2465                                                                                                                                                                               |
| AWRIv2 AWRI_2064       | protein _2465                                                                                                                                                                               |
| LAMAP LAMAP2480_2830   | cardiolipin-specific deacylase, mitochondrial                                                                                                                                               |
| CBS2499v2 CBS2499_1337 | cardiolipin-specific deacylase, mitochondrial                                                                                                                                               |
| AWRIv2 AWRI_2072       | cardiolipin-specific deacylase, mitochondrial                                                                                                                                               |
| LAMAP LAMAP2480_2836   | ligase, beta subunit                                                                                                                                                                        |
| CBS2499v2 CBS2499_1331 | ligase, beta subunit                                                                                                                                                                        |
| AWRIv2 AWRI_3602       | ligase, beta subunit                                                                                                                                                                        |
| LAMAP LAMAP2480_2839   | of Elongator complex, which is required for modification of wobble nucleosides in tRNA; required for Elongator structural integrity                                                         |
| CBS2499v2 CBS2499_1327 | of hexameric RecA-like ATPase Elp456 Elongator subcomplex; which is required for modification of wobble nucleosides in tRNA; required for Elongator structural integrity                    |
| AWRIv2 AWRI_3599       | nucleosides in tRNA; required for Elongator structural integrity                                                                                                                            |
| LAMAP LAMAP2480_2849   | complex protein 4                                                                                                                                                                           |
| CBS2499v2 CBS2499_1315 | acetyltransferase TAN1                                                                                                                                                                      |
| AWRIv2 AWRI_3586       | acetyltransferase TAN1                                                                                                                                                                      |
| LAMAP LAMAP2480_2850   | acetyltransferase TAN1                                                                                                                                                                      |
| CBS2499v2 CBS2499_1314 | protein _4282                                                                                                                                                                               |
| AWRIv2 AWRI_3585       | protein _4282                                                                                                                                                                               |
| LAMAP LAMAP2480_2852   | protein _4282                                                                                                                                                                               |
| CBS2499v2 CBS2499_1310 | hydrolase family                                                                                                                                                                            |
| AWRIv2 AWRI_3582       | protein YJR098C                                                                                                                                                                             |
| LAMAP LAMAP2480_2853   | hydrolase family                                                                                                                                                                            |
| CBS2499v2 CBS2499_1309 | biosynthesis protein 4                                                                                                                                                                      |
| AWRIv2 AWRI_3581       | biosynthesis protein 4                                                                                                                                                                      |
| LAMAP LAMAP2480_2855   | biosynthesis protein 4                                                                                                                                                                      |
| CBS2499v2 CBS2499_1303 | of telomere capping protein 1                                                                                                                                                               |
| AWRIv2 AWRI_3575       | of telomere capping protein 1                                                                                                                                                               |
| LAMAP LAMAP2480_2858   | of telomere capping protein 1                                                                                                                                                               |
| CBS2499v2 CBS2499_3222 | protein _2313                                                                                                                                                                               |
| AWRIv2 AWRI_1939       | protein HPODL_03172                                                                                                                                                                         |
| LAMAP LAMAP2480_2860   | protein _2313                                                                                                                                                                               |
| CBS2499v2 CBS2499_3220 | protein SAP155                                                                                                                                                                              |
| AWRIv2 AWRI_1936       | protein SAP155                                                                                                                                                                              |
| LAMAP LAMAP2480_2878   | protein SAP155                                                                                                                                                                              |
| CBS2499v2 CBS2499_2217 | membrane protein YOL107W                                                                                                                                                                    |
| AWRIv2 AWRI_2824       | protein 115 homolog                                                                                                                                                                         |
| LAMAP LAMAP2480_2883   | protein 115 homolog                                                                                                                                                                         |
| CBS2499v2 CBS2499_2222 | catalyzes the eighth step in histidine biosynthesis; mutations cause histidine auxotrophy and sensitivity to Cu, Co, and Ni salts; transcription is regulated by general amino acid control |
| AWRIv2 AWRI_2827       | catalyzes the eighth step in histidine biosynthesis; mutations cause histidine auxotrophy and sensitivity to Cu, Co, and Ni salts; transcription is regulated by general amino acid control |
| LAMAP LAMAP2480_2899   | phosphate phosphatase HisJ family                                                                                                                                                           |
| CBS2499v2 CBS2499_2238 | resistance protein SNG1                                                                                                                                                                     |
|                        | resistance protein SNG1                                                                                                                                                                     |

|                        |                                                                                                          |
|------------------------|----------------------------------------------------------------------------------------------------------|
| AWRIv2 AWRI_2837       | endoplasmic reticulum membrane protein YJR015W                                                           |
| LAMAP LAMAP2480_2906   | protein 1                                                                                                |
| CBS2499v2 CBS2499_2244 | regulator CBF1                                                                                           |
| AWRIv2 AWRI_2841       | regulator CBF1                                                                                           |
| LAMAP LAMAP2480_2909   | protein _3418                                                                                            |
| CBS2499v2 CBS2499_2247 | protein _3418                                                                                            |
| AWRIv2 AWRI_2843       | protein _3418                                                                                            |
| LAMAP LAMAP2480_2918   | PEP-CTERM system TPR-repeat lipoprotein                                                                  |
| CBS2499v2 CBS2499_2259 | IV pilus biogenesis/stability protein PilW                                                               |
| AWRIv2 AWRI_2846       | transcriptional corepressor CYC8                                                                         |
| LAMAP LAMAP2480_2920   | complex subunit mu                                                                                       |
| CBS2499v2 CBS2499_2262 | complex subunit mu                                                                                       |
| AWRIv2 AWRI_2849       | complex subunit mu                                                                                       |
| LAMAP LAMAP2480_2923   | transport transcription regulator RGT1                                                                   |
| CBS2499v2 CBS2499_2265 | transport transcription regulator RGT1                                                                   |
| AWRIv2 AWRI_2851       | protein HPODL_03195                                                                                      |
| LAMAP LAMAP2480_2926   | protein                                                                                                  |
| CBS2499v2 CBS2499_2268 | protein                                                                                                  |
| AWRIv2 AWRI_2854       | protein                                                                                                  |
| LAMAP LAMAP2480_2928   | domain-containing protein 1                                                                              |
| CBS2499v2 CBS2499_2270 | protein 45                                                                                               |
| AWRIv2 AWRI_2856       | protein 45                                                                                               |
| LAMAP LAMAP2480_2929   | repression protein creC                                                                                  |
| CBS2499v2 CBS2499_2271 | repression protein creC                                                                                  |
| AWRIv2 AWRI_3827       | repression protein creC                                                                                  |
| LAMAP LAMAP2480_2939   | RNA polymerase III subunit RPC7                                                                          |
| CBS2499v2 CBS2499_2281 | RNA polymerase III subunit RPC7                                                                          |
| AWRIv2 AWRI_3835       | RNA polymerase III subunit RPC7                                                                          |
| LAMAP LAMAP2480_2957   |                                                                                                          |
| CBS2499v2 CBS2499_3017 | cellobiohydrolase CEL6A                                                                                  |
| AWRIv2 AWRI_1283       | cellobiohydrolase CEL6A                                                                                  |
| LAMAP LAMAP2480_2971   | transcription factor YER064C                                                                             |
| CBS2499v2 CBS2499_3002 | factor VHR2                                                                                              |
| AWRIv2 AWRI_1295       | factor VHR2                                                                                              |
| LAMAP LAMAP2480_2980   | domain-containing protein 3                                                                              |
| CBS2499v2 CBS2499_4943 | domain-containing protein 3                                                                              |
| AWRIv2 AWRI_3115       | domain-containing protein 3                                                                              |
| LAMAP LAMAP2480_2981   | recognition particle 14kd protein                                                                        |
| CBS2499v2 CBS2499_4942 | recognition particle subunit SRP14                                                                       |
| AWRIv2 AWRI_3114       | recognition particle 14kd protein                                                                        |
| LAMAP LAMAP2480_2984   | ASM4                                                                                                     |
| CBS2499v2 CBS2499_4940 | ASM4                                                                                                     |
| AWRIv2 AWRI_3113       | ASM4                                                                                                     |
|                        | integral to the mitochondrial membrane; has a conserved methyltransferase motif; multicopy suppressor of |
| LAMAP LAMAP2480_2986   | respiratory defects caused by OXA1 mutations                                                             |

|                        |                                                                                                                                                                                                                    |
|------------------------|--------------------------------------------------------------------------------------------------------------------------------------------------------------------------------------------------------------------|
| CBS2499v2 CBS2499_4939 | integral to the mitochondrial membrane; has a conserved methyltransferase motif and is predicted to be an RNA methyltransferase; multicopy suppressor of respiratory defects caused by OXA1 mutations              |
| AWRlv2 AWRI_3112       | integral to the mitochondrial membrane; has a conserved methyltransferase motif and is predicted to be an RNA methyltransferase; multicopy suppressor of respiratory defects caused by OXA1 mutations              |
| LAMAP LAMAP2480_2993   | alpha mannosidase, involved in free oligosaccharide (fOS) degradation; delivered to the vacuole in a novel pathway separate from the secretory pathway                                                             |
| CBS2499v2 CBS2499_2156 | alpha mannosidase; involved in free oligosaccharide (fOS) degradation; delivered to the vacuole in a novel pathway separate from the secretory pathway                                                             |
| AWRlv2 AWRI_2893       | alpha mannosidase; involved in free oligosaccharide (fOS) degradation; delivered to the vacuole in a novel pathway separate from the secretory pathway                                                             |
| LAMAP LAMAP2480_2996   | domain-containing protein WWM1                                                                                                                                                                                     |
| CBS2499v2 CBS2499_2153 | domain-containing protein WWM1                                                                                                                                                                                     |
| AWRlv2 AWRI_2894       | domain-containing protein WWM1                                                                                                                                                                                     |
| LAMAP LAMAP2480_2997   | metalloprotease of the mitochondrial intermembrane space, member of the pitrilysin family; degrades proteins and presequence peptides cleaved from imported proteins; required for normal mitochondrial morphology |
| CBS2499v2 CBS2499_2152 | metalloprotease of the pitrilysin family; metalloprotease of the intermembrane space; degrades proteins and presequence peptides cleaved from imported proteins; required for normal mitochondrial morphology      |
| AWRlv2 AWRI_2895       | metalloprotease of the pitrilysin family; metalloprotease of the intermembrane space; degrades proteins and presequence peptides cleaved from imported proteins; required for normal mitochondrial morphology      |
| LAMAP LAMAP2480_3012   | protein _1061                                                                                                                                                                                                      |
| CBS2499v2 CBS2499_2134 | protein _1061                                                                                                                                                                                                      |
| AWRlv2 AWRI_0873       | protein _1061                                                                                                                                                                                                      |
| LAMAP LAMAP2480_3015   | of rapamycin complex 2 subunit AVO2                                                                                                                                                                                |
| CBS2499v2 CBS2499_2132 | of rapamycin complex 2 subunit AVO2                                                                                                                                                                                |
| AWRlv2 AWRI_0875       | ankyrin repeat protein FPV245                                                                                                                                                                                      |
| LAMAP LAMAP2480_3016   | RING finger protein C2F3.16                                                                                                                                                                                        |
| CBS2499v2 CBS2499_2131 | RING finger protein C2F3.16                                                                                                                                                                                        |
| AWRlv2 AWRI_0876       | RING finger protein C2F3.16                                                                                                                                                                                        |
| LAMAP LAMAP2480_3017   | membrane protein localized to late Golgi vesicles along with the v-SNARE Tlg2p; may interact with ribosomes, based on co-purification experiments                                                                  |
| CBS2499v2 CBS2499_2130 | membrane protein; localized to late Golgi vesicles along with the v-SNARE Tlg2p; may interact with ribosomes, based on co-purification experiments; may have a role in intracellular sterol transport              |
| AWRlv2 AWRI_0877       | membrane protein; localized to late Golgi vesicles along with the v-SNARE Tlg2p; may interact with ribosomes, based on co-purification experiments; may have a role in intracellular sterol transport              |
| LAMAP LAMAP2480_3033   | elongation factor SPT5                                                                                                                                                                                             |
| CBS2499v2 CBS2499_2113 | elongation factor SPT5                                                                                                                                                                                             |
| AWRlv2 AWRI_0894       | elongation factor SPT5                                                                                                                                                                                             |
| LAMAP LAMAP2480_3043   | protein product                                                                                                                                                                                                    |
| CBS2499v2 CBS2499_4438 | protein product                                                                                                                                                                                                    |

|                        |                                                                                                                                                                                                                                                                                                                                                                           |   |
|------------------------|---------------------------------------------------------------------------------------------------------------------------------------------------------------------------------------------------------------------------------------------------------------------------------------------------------------------------------------------------------------------------|---|
| AWRIv2 AWRI_2112       | protein _2527                                                                                                                                                                                                                                                                                                                                                             |   |
| LAMAP LAMAP2480_3052   | poly(A)-specific ribonuclease subunit PAN3                                                                                                                                                                                                                                                                                                                                |   |
| CBS2499v2 CBS2499_4446 | poly(A)-specific ribonuclease subunit PAN3                                                                                                                                                                                                                                                                                                                                |   |
| AWRIv2 AWRI_2118       | poly(A)-specific ribonuclease subunit pan3                                                                                                                                                                                                                                                                                                                                |   |
| LAMAP LAMAP2480_3066   | RNA polymerase III subunit RPC5                                                                                                                                                                                                                                                                                                                                           |   |
| CBS2499v2 CBS2499_4467 | RNA polymerase III subunit RPC5                                                                                                                                                                                                                                                                                                                                           |   |
| AWRIv2 AWRI_3148       | RNA polymerase III subunit RPC5                                                                                                                                                                                                                                                                                                                                           |   |
| LAMAP LAMAP2480_3097   | regulatory protein DEP1                                                                                                                                                                                                                                                                                                                                                   |   |
| CBS2499v2 CBS2499_4971 | regulatory protein DEP1                                                                                                                                                                                                                                                                                                                                                   |   |
| AWRIv2 AWRI_3124       | regulatory protein DEP1                                                                                                                                                                                                                                                                                                                                                   |   |
| LAMAP LAMAP2480_3101   | protein _3737                                                                                                                                                                                                                                                                                                                                                             |   |
| CBS2499v2 CBS2499_4968 | protein _3737                                                                                                                                                                                                                                                                                                                                                             |   |
| AWRIv2 AWRI_3122       | protein _3737                                                                                                                                                                                                                                                                                                                                                             |   |
|                        | NAPDH-dependent diflavin reductase, component of an early step in the cytosolic Fe-S protein assembly (CIA) machinery; transfers electrons from NADPH to the Fe-S cluster of Dre2p; plays a pro-death role under oxidative stress                                                                                                                                         |   |
| LAMAP LAMAP2480_3114   | NAPDH-dependent diflavin reductase; component of an early step in the cytosolic Fe-S protein assembly (CIA) machinery; transfers electrons from NADPH to the Fe-S cluster of Dre2p; plays a pro-death role under oxidative stress; Tah18p-dependent nitric oxide synthesis confers high-temperature stress tolerance; possible target for development of antifungal drugs |   |
| CBS2499v2 CBS2499_4955 | NAPDH-dependent diflavin reductase; component of an early step in the cytosolic Fe-S protein assembly (CIA) machinery; transfers electrons from NADPH to the Fe-S cluster of Dre2p; plays a pro-death role under oxidative stress; Tah18p-dependent nitric oxide synthesis confers high-temperature stress tolerance; possible target for development of antifungal drugs |   |
| AWRIv2 AWRI_3087       |                                                                                                                                                                                                                                                                                                                                                                           |   |
| LAMAP LAMAP2480_3125   | V, beta subunit                                                                                                                                                                                                                                                                                                                                                           |   |
| CBS2499v2 CBS2499_3231 | V, beta subunit                                                                                                                                                                                                                                                                                                                                                           |   |
| AWRIv2 AWRI_1946       | V, beta subunit                                                                                                                                                                                                                                                                                                                                                           |   |
| LAMAP LAMAP2480_3126   | <b>transporter ESBP6</b>                                                                                                                                                                                                                                                                                                                                                  |   |
| CBS2499v2 CBS2499_3232 | transporter ESBP6                                                                                                                                                                                                                                                                                                                                                         |   |
| AWRIv2 AWRI_1947       | transporter ESBP6                                                                                                                                                                                                                                                                                                                                                         |   |
| LAMAP LAMAP2480_3150   | <b>permease, mediates purine (adenine, guanine, and hypoxanthine) and cytosine accumulation</b>                                                                                                                                                                                                                                                                           |   |
| CBS2499v2 CBS2499_1089 | permease; mediates purine (adenine, guanine, and hypoxanthine) and cytosine accumulation; relative distribution to the vacuole increases upon DNA replication stress                                                                                                                                                                                                      |   |
| AWRIv2 AWRI_0610       | purine-cytosine permease; very similar to Fcy2p but cannot substitute for its function                                                                                                                                                                                                                                                                                    |   |
| LAMAP LAMAP2480_3159   | wry family protein 8                                                                                                                                                                                                                                                                                                                                                      | 7 |
| CBS2499v2 CBS2499_1081 |                                                                                                                                                                                                                                                                                                                                                                           | 7 |
| AWRIv2 AWRI_0615       |                                                                                                                                                                                                                                                                                                                                                                           |   |
| LAMAP LAMAP2480_3160   | wry family protein 8                                                                                                                                                                                                                                                                                                                                                      | 1 |
| CBS2499v2 CBS2499_1080 |                                                                                                                                                                                                                                                                                                                                                                           | 4 |
| AWRIv2 AWRI_0616       |                                                                                                                                                                                                                                                                                                                                                                           |   |
| LAMAP LAMAP2480_3165   | protein                                                                                                                                                                                                                                                                                                                                                                   |   |
| CBS2499v2 CBS2499_1075 | protein HPODL_00030                                                                                                                                                                                                                                                                                                                                                       |   |
| AWRIv2 AWRI_0620       | protein _0763                                                                                                                                                                                                                                                                                                                                                             |   |

|                        |                                                                                                                                                                                                                                                                                                                                                                                |
|------------------------|--------------------------------------------------------------------------------------------------------------------------------------------------------------------------------------------------------------------------------------------------------------------------------------------------------------------------------------------------------------------------------|
| LAMAP LAMAP2480_3173   | protein                                                                                                                                                                                                                                                                                                                                                                        |
| CBS2499v2 CBS2499_1067 | protein                                                                                                                                                                                                                                                                                                                                                                        |
| AWRIv2 AWRI_0628       | protein                                                                                                                                                                                                                                                                                                                                                                        |
|                        | light chain, subunit of the major coat protein involved in intracellular protein transport and endocytosis; thought to regulate clathrin function; two Clathrin heavy chains (CHC1) form the clathrin triskelion structural component                                                                                                                                          |
| LAMAP LAMAP2480_3191   | light chain; subunit of the major coat protein involved in intracellular protein transport and endocytosis; regulates endocytic progression; thought to regulate clathrin function; the clathrin triskelion is a trimeric molecule composed of three heavy chains that radiate from a vertex and three light chains which bind noncovalently near the vertex of the triskelion |
| CBS2499v2 CBS2499_1820 | light chain                                                                                                                                                                                                                                                                                                                                                                    |
| AWRIv2 AWRI_2258       | polymerase (pol2)                                                                                                                                                                                                                                                                                                                                                              |
| LAMAP LAMAP2480_3209   | polymerase (pol2)                                                                                                                                                                                                                                                                                                                                                              |
| CBS2499v2 CBS2499_1803 | polymerase (pol2)                                                                                                                                                                                                                                                                                                                                                              |
| AWRIv2 AWRI_4118       | protein                                                                                                                                                                                                                                                                                                                                                                        |
| LAMAP LAMAP2480_3210   | protein                                                                                                                                                                                                                                                                                                                                                                        |
| CBS2499v2 CBS2499_1802 | protein                                                                                                                                                                                                                                                                                                                                                                        |
| AWRIv2 AWRI_4119       | ribosomal protein of the large subunit, homolog of prokaryotic L29 ribosomal protein; located at the ribosomal tunnel exit                                                                                                                                                                                                                                                     |
| LAMAP LAMAP2480_3216   | ribosomal protein of the large subunit; homolog of prokaryotic L29 ribosomal protein; located at the ribosomal tunnel exit                                                                                                                                                                                                                                                     |
| CBS2499v2 CBS2499_1797 | ribosomal protein of the large subunit; homolog of prokaryotic L29 ribosomal protein; located at the ribosomal tunnel exit                                                                                                                                                                                                                                                     |
| AWRIv2 AWRI_4123       | ribosomal protein of the large subunit; homolog of prokaryotic L29 ribosomal protein; located at the ribosomal tunnel exit                                                                                                                                                                                                                                                     |
| LAMAP LAMAP2480_3218   | protein RAP1                                                                                                                                                                                                                                                                                                                                                                   |
| CBS2499v2 CBS2499_1795 | protein RAP1                                                                                                                                                                                                                                                                                                                                                                   |
| AWRIv2 AWRI_4124       | DNA-binding                                                                                                                                                                                                                                                                                                                                                                    |
| LAMAP LAMAP2480_3220   | machinery-associated protein 64                                                                                                                                                                                                                                                                                                                                                |
| CBS2499v2 CBS2499_1793 | machinery-associated protein 64                                                                                                                                                                                                                                                                                                                                                |
| AWRIv2 AWRI_1474       | machinery-associated protein 64                                                                                                                                                                                                                                                                                                                                                |
| LAMAP LAMAP2480_3223   | organelle assembly protein TopJ                                                                                                                                                                                                                                                                                                                                                |
| CBS2499v2 CBS2499_1789 | organelle assembly protein TopJ                                                                                                                                                                                                                                                                                                                                                |
| AWRIv2 AWRI_1471       | organelle assembly protein TopJ                                                                                                                                                                                                                                                                                                                                                |
| LAMAP LAMAP2480_3229   | proton ATPase subunit H                                                                                                                                                                                                                                                                                                                                                        |
| CBS2499v2 CBS2499_1782 | proton ATPase subunit H                                                                                                                                                                                                                                                                                                                                                        |
| AWRIv2 AWRI_1467       | proton ATPase subunit H                                                                                                                                                                                                                                                                                                                                                        |
| LAMAP LAMAP2480_3244   | EBS1                                                                                                                                                                                                                                                                                                                                                                           |
| CBS2499v2 CBS2499_1766 | EBS1                                                                                                                                                                                                                                                                                                                                                                           |
| AWRIv2 AWRI_1454       | EBS1                                                                                                                                                                                                                                                                                                                                                                           |
| LAMAP LAMAP2480_3271   | membrane protein YGR026W                                                                                                                                                                                                                                                                                                                                                       |
| CBS2499v2 CBS2499_2052 | membrane protein YGR026W                                                                                                                                                                                                                                                                                                                                                       |
| AWRIv2 AWRI_0952       | membrane protein YGR026W                                                                                                                                                                                                                                                                                                                                                       |
| LAMAP LAMAP2480_3273   | SUMO-protein ligase RanBP2                                                                                                                                                                                                                                                                                                                                                     |
| CBS2499v2 CBS2499_2054 | SUMO-protein ligase RanBP2                                                                                                                                                                                                                                                                                                                                                     |
| AWRIv2 AWRI_0950       | NUP2                                                                                                                                                                                                                                                                                                                                                                           |

|                        |                                                                                                                                                                                                                                                                                                                     |
|------------------------|---------------------------------------------------------------------------------------------------------------------------------------------------------------------------------------------------------------------------------------------------------------------------------------------------------------------|
| LAMAP LAMAP2480_3290   | protein of unknown function; green fluorescent protein (GFP)-fusion protein localizes to the cytoplasm and nucleus; YDL144C is not an essential gene.                                                                                                                                                               |
| CBS2499v2 CBS2499_2075 | of unknown function; green fluorescent protein (GFP)-fusion protein localizes to the cytoplasm and nucleus; YDL144C is not an essential gene; protein abundance increases in response to DNA replication stress                                                                                                     |
| AWRlv2 AWRI_0929       | of unknown function; green fluorescent protein (GFP)-fusion protein localizes to the cytoplasm and nucleus; YDL144C is not an essential gene; protein abundance increases in response to DNA replication stress                                                                                                     |
| LAMAP LAMAP2480_3299   | intermediate peptidase, cleaves destabilizing N-terminal residues of a subset of proteins upon import, after their cleavage by mitochondrial processing peptidase (Mas1p-Mas2p); may contribute to mitochondrial iron homeostasis                                                                                   |
| CBS2499v2 CBS2499_2085 | intermediate peptidase; cleaves destabilizing N-terminal residues of a subset of proteins upon import, after their cleavage by mitochondrial processing peptidase (Mas1p-Mas2p); may contribute to mitochondrial iron homeostasis                                                                                   |
| AWRlv2 AWRI_0921       | intermediate peptidase; cleaves destabilizing N-terminal residues of a subset of proteins upon import, after their cleavage by mitochondrial processing peptidase (Mas1p-Mas2p); may contribute to mitochondrial iron homeostasis                                                                                   |
| LAMAP LAMAP2480_3305   | family/GOLD                                                                                                                                                                                                                                                                                                         |
| CBS2499v2 CBS2499_2091 | family/GOLD                                                                                                                                                                                                                                                                                                         |
| AWRlv2 AWRI_0917       | family/GOLD                                                                                                                                                                                                                                                                                                         |
| LAMAP LAMAP2480_3312   | biosynthesis protein CHS5                                                                                                                                                                                                                                                                                           |
| CBS2499v2 CBS2499_2097 | biosynthesis protein CHS5                                                                                                                                                                                                                                                                                           |
| AWRlv2 AWRI_0911       | biosynthesis protein CHS5                                                                                                                                                                                                                                                                                           |
| LAMAP LAMAP2480_3314   | protein 1                                                                                                                                                                                                                                                                                                           |
| CBS2499v2 CBS2499_2100 | protein 1                                                                                                                                                                                                                                                                                                           |
| AWRlv2 AWRI_0908       | protein C21B10.03c                                                                                                                                                                                                                                                                                                  |
| LAMAP LAMAP2480_3316   | protein _1101                                                                                                                                                                                                                                                                                                       |
| CBS2499v2 CBS2499_2101 | protein                                                                                                                                                                                                                                                                                                             |
| AWRlv2 AWRI_0907       | protein _1101                                                                                                                                                                                                                                                                                                       |
| LAMAP LAMAP2480_3323   | RNA polymerase, mitochondrial                                                                                                                                                                                                                                                                                       |
| CBS2499v2 CBS2499_2106 | RNA polymerase, mitochondrial                                                                                                                                                                                                                                                                                       |
| AWRlv2 AWRI_0903       | RNA polymerase; single subunit enzyme similar to those of T3 and T7 bacteriophages; requires a specificity subunit encoded by MTF1 for promoter recognition; Mtf1p interacts with and stabilizes the Rpo41p-promoter complex, enhancing DNA bending and melting to facilitate pre-initiation open complex formation |
| LAMAP LAMAP2480_3333   | protein HPODL_01719                                                                                                                                                                                                                                                                                                 |
| CBS2499v2 CBS2499_2114 | protein HPODL_01719                                                                                                                                                                                                                                                                                                 |
| AWRlv2 AWRI_0892       | threonine protein kinase                                                                                                                                                                                                                                                                                            |
| LAMAP LAMAP2480_3339   | finger protein REH1                                                                                                                                                                                                                                                                                                 |
| CBS2499v2 CBS2499_2121 | 60S subunit biogenesis factor REH1                                                                                                                                                                                                                                                                                  |
| AWRlv2 AWRI_0884       | 60S subunit biogenesis factor REH1                                                                                                                                                                                                                                                                                  |
| LAMAP LAMAP2480_3340   | of the GINS complex (Sld5p, Psf1p, Psf2p, Psf3p), which is localized to DNA replication origins and implicated in assembly of the DNA replication machinery                                                                                                                                                         |

CBS2499v2|CBS2499\_2122  
AWRIv2|AWRI\_0883  
LAMAP|LAMAP2480\_3343  
CBS2499v2|CBS2499\_2125  
AWRIv2|AWRI\_0881  
LAMAP|LAMAP2480\_3344  
CBS2499v2|CBS2499\_2126  
AWRIv2|AWRI\_0880  
LAMAP|LAMAP2480\_3350  
CBS2499v2|CBS2499\_2133  
AWRIv2|AWRI\_0874  
LAMAP|LAMAP2480\_3357  
CBS2499v2|CBS2499\_1934  
AWRIv2|AWRI\_1627  
LAMAP|LAMAP2480\_3390  
CBS2499v2|CBS2499\_1967  
AWRIv2|AWRI\_1603  
LAMAP|LAMAP2480\_3391  
CBS2499v2|CBS2499\_1968  
AWRIv2|AWRI\_1602  
LAMAP|LAMAP2480\_3401  
CBS2499v2|CBS2499\_1977  
AWRIv2|AWRI\_1592  
LAMAP|LAMAP2480\_3403  
CBS2499v2|CBS2499\_1979  
AWRIv2|AWRI\_1589  
LAMAP|LAMAP2480\_3411  
CBS2499v2|CBS2499\_1987  
AWRIv2|AWRI\_1584  
LAMAP|LAMAP2480\_3412  
CBS2499v2|CBS2499\_1988  
AWRIv2|AWRI\_1583  
LAMAP|LAMAP2480\_3413  
CBS2499v2|CBS2499\_1989  
AWRIv2|AWRI\_1582  
LAMAP|LAMAP2480\_3414  
CBS2499v2|CBS2499\_1990  
AWRIv2|AWRI\_1581  
LAMAP|LAMAP2480\_3417  
CBS2499v2|CBS2499\_1996  
AWRIv2|AWRI\_1575  
  
LAMAP|LAMAP2480\_3420

of the GINS complex (Sld5p, Psf1p, Psf2p, Psf3p); complex is localized to DNA replication origins and implicated in assembly of the DNA replication machinery  
formyltransferase  
protein \_1070  
protein \_1070  
protein \_1070  
factor subunit NURF301-like  
factor subunit NURF301-like  
adjacent to zinc finger domain protein 2B  
**nicotinic acid transporter**  
nicotinic acid transporter  
transporter C1002.16c  
**transporter AQR1**  
transporter AQR1  
transporter AQR1  
domain-containing protein 5  
domain-containing protein 5  
domain-containing protein 5  
protein \_1886  
protein \_1886  
protein \_1886  
protein sorting-associated protein 3  
protein sorting-associated protein 3  
protein sorting-associated protein 3  
LTV1  
LTV1  
LTV1  
factor 3  
protein RMD8  
factor 3  
polymerase-associated protein C651.09c  
polymerase-associated protein C651.09c  
polymerase-associated protein C651.09c  
subunit beta-5  
subunit beta-5  
subunit beta-5  
negative regulator of transcription subunit 4  
negative regulator of transcription subunit 4  
negative regulator of transcription subunit 4  
enzyme subunit 1  
enzyme subunit 1  
enzyme subunit 1  
subunit of the coatomer complex (COPI), which coats Golgi-derived transport vesicles; involved in retrograde transport between Golgi and ER

|                                                                                                                                                              |                                                                                                                                                                                                                                                                                                                                                                                                                                                                                                                        |
|--------------------------------------------------------------------------------------------------------------------------------------------------------------|------------------------------------------------------------------------------------------------------------------------------------------------------------------------------------------------------------------------------------------------------------------------------------------------------------------------------------------------------------------------------------------------------------------------------------------------------------------------------------------------------------------------|
| CBS2499v2 CBS2499_1999<br>AWRIv2 AWRI_1572                                                                                                                   | subunit of the coatomer complex (COPI); COPI coats Golgi-derived transport vesicles; involved in retrograde transport between Golgi and ER<br>subunit delta                                                                                                                                                                                                                                                                                                                                                            |
| LAMAP LAMAP2480_3432                                                                                                                                         | subunit of the heteromeric nascent polypeptide-associated complex (NAC) involved in protein sorting and translocation, associated with cytoplasmic ribosomes                                                                                                                                                                                                                                                                                                                                                           |
| CBS2499v2 CBS2499_0220                                                                                                                                       | subunit of the nascent polypeptide-associated complex (NAC); involved in protein sorting and translocation; associated with cytoplasmic ribosomes                                                                                                                                                                                                                                                                                                                                                                      |
| AWRIv2 AWRI_2243<br>LAMAP LAMAP2480_3433<br>CBS2499v2 CBS2499_0219<br>AWRIv2 AWRI_2242                                                                       | subunit of the nascent polypeptide-associated complex (NAC); involved in protein sorting and translocation; associated with cytoplasmic ribosomes<br>membrane protein YHR192W<br>transmembrane protein<br>transmembrane protein                                                                                                                                                                                                                                                                                        |
| LAMAP LAMAP2480_3440                                                                                                                                         | <b>with a potential role in cell survival pathways, required for the diauxic growth shift; expression in mammalian cells increases survival under conditions inducing apoptosis; mutant has increased aneuploidy tolerance</b>                                                                                                                                                                                                                                                                                         |
| CBS2499v2 CBS2499_0211                                                                                                                                       | with a potential role in cell survival pathways; required for the diauxic growth shift; expression in mammalian cells increases survival under conditions inducing apoptosis; mutant has increased aneuploidy tolerance                                                                                                                                                                                                                                                                                                |
| AWRIv2 AWRI_2237<br>LAMAP LAMAP2480_3489<br>CBS2499v2 CBS2499_3331<br>AWRIv2 AWRI_0181<br>LAMAP LAMAP2480_3510<br>CBS2499v2 CBS2499_3523<br>AWRIv2 AWRI_3335 | with a potential role in cell survival pathways; required for the diauxic growth shift; expression in mammalian cells increases survival under conditions inducing apoptosis; mutant has increased aneuploidy tolerance<br>cyclin CLN1<br>cyclin CCN1<br>cyclin CCN1<br>factor tau subunit sfc1<br>factor tau subunit sfc1<br>factor tau 95 kDa subunit                                                                                                                                                                |
| LAMAP LAMAP2480_3514                                                                                                                                         | subunit of the capping protein (CP) heterodimer (Cap1p and Cap2p) which binds to the barbed ends of actin filaments preventing further polymerization; localized predominantly to cortical actin patches                                                                                                                                                                                                                                                                                                               |
| CBS2499v2 CBS2499_3519                                                                                                                                       | subunit of the capping protein heterodimer (Cap1p and Cap2p); capping protein (CP) binds to the barbed ends of actin filaments preventing further polymerization; localized predominantly to cortical actin patches; protein increases in abundance and relocates from bud neck to plasma membrane upon DNA replication stress                                                                                                                                                                                         |
| AWRIv2 AWRI_3330<br>LAMAP LAMAP2480_3517<br>CBS2499v2 CBS2499_3516<br>AWRIv2 AWRI_3328<br>LAMAP LAMAP2480_3519<br>CBS2499v2 CBS2499_3514<br>AWRIv2 AWRI_3326 | subunit of the capping protein heterodimer (Cap1p and Cap2p); capping protein (CP) binds to the barbed ends of actin filaments preventing further polymerization; localized predominantly to cortical actin patches; protein increases in abundance and relocates from bud neck to plasma membrane upon DNA replication stress<br>translation elongation factor<br>translation elongation factor<br>elongation factor Tu<br>protein sorting-associated protein vps5<br>nexin-2<br>protein sorting-associated protein 5 |

|                        |                                                                                                                                                                                                                                                                                                                                                                                                                                                                                      |
|------------------------|--------------------------------------------------------------------------------------------------------------------------------------------------------------------------------------------------------------------------------------------------------------------------------------------------------------------------------------------------------------------------------------------------------------------------------------------------------------------------------------|
| LAMAP LAMAP2480_3522   | acetyltransferase B complex subunit MDM20                                                                                                                                                                                                                                                                                                                                                                                                                                            |
| CBS2499v2 CBS2499_3512 | acetyltransferase B complex subunit MDM20                                                                                                                                                                                                                                                                                                                                                                                                                                            |
| AWRIv2 AWRI_3324       | inheritance and actin cytoskeleton organization protein                                                                                                                                                                                                                                                                                                                                                                                                                              |
| LAMAP LAMAP2480_3542   | proteinase yapsin-7                                                                                                                                                                                                                                                                                                                                                                                                                                                                  |
| CBS2499v2 CBS2499_3494 | proteinase yapsin-7                                                                                                                                                                                                                                                                                                                                                                                                                                                                  |
| AWRIv2 AWRI_3529       | proteinase yapsin-7                                                                                                                                                                                                                                                                                                                                                                                                                                                                  |
| LAMAP LAMAP2480_3545   | protein 1                                                                                                                                                                                                                                                                                                                                                                                                                                                                            |
| CBS2499v2 CBS2499_3491 |                                                                                                                                                                                                                                                                                                                                                                                                                                                                                      |
| AWRIv2 AWRI_3525       |                                                                                                                                                                                                                                                                                                                                                                                                                                                                                      |
| LAMAP LAMAP2480_3603   | <b>membrane H+-pantothenate symporter; confers sensitivity to the antifungal agent fenpropimorph</b>                                                                                                                                                                                                                                                                                                                                                                                 |
| CBS2499v2 CBS2499_4923 | membrane H+-pantothenate symporter; confers sensitivity to the antifungal agent fenpropimorph; relocates from vacuole to cytoplasm upon DNA replication stress                                                                                                                                                                                                                                                                                                                       |
| AWRIv2 AWRI_3099       | membrane H+-pantothenate symporter; confers sensitivity to the antifungal agent fenpropimorph; relocates from vacuole to cytoplasm upon DNA replication stress                                                                                                                                                                                                                                                                                                                       |
| LAMAP LAMAP2480_3622   | cytoplasmic protein that serves as a scaffold for binding Get4/5p and other proteins required to mediate posttranslational insertion of tail-anchored proteins into the ER membrane; has similarity to human cochaperone SGT                                                                                                                                                                                                                                                         |
| CBS2499v2 CBS2499_4952 | cytoplasmic cochaperone; serves as a scaffold bringing together Get4, Get5p, and other TRC complex members that are required to mediate posttranslational insertion of tail-anchored proteins into the ER membrane; interacts with the prion domain of Sup35p; amyloid sensor; plays a role in targeting chaperones to prion aggregates; has similarity to human cochaperone SGT; forms cytoplasmic foci upon DNA replication stress                                                 |
| AWRIv2 AWRI_3084       | cytoplasmic cochaperone; serves as a scaffold bringing together Get4, Get5p, and other TRC complex members that are required to mediate posttranslational insertion of tail-anchored proteins into the ER membrane; interacts with the prion domain of Sup35p; amyloid sensor; plays a role in targeting chaperones to prion aggregates; has similarity to human cochaperone SGT; forms cytoplasmic foci upon DNA replication stress                                                 |
| LAMAP LAMAP2480_3625   | helicase proposed to promote replication fork regression during postreplication repair by template switching; RING finger containing ubiquitin ligase; stimulates the synthesis of free and PCNA-bound polyubiquitin chains by Ubc13p-Mms2p                                                                                                                                                                                                                                          |
| CBS2499v2 CBS2499_0025 | helicase/Ubiquitin ligase; involved in error-free branch of DNA damage tolerance (DDT) pathway; proposed to promote replication fork regression during postreplication repair by template switching; stimulates synthesis of free and PCNA-bound polyubiquitin chains by Ubc13p-Mms2p; required for error-prone translesion synthesis; forms nuclear foci upon DNA replication stress; associates with native telomeres, cooperates with homologous recombination in senescent cells |
| AWRIv2 AWRI_0796       | repair protein RAD5                                                                                                                                                                                                                                                                                                                                                                                                                                                                  |
| LAMAP LAMAP2480_3655   | protein HRT3                                                                                                                                                                                                                                                                                                                                                                                                                                                                         |
| CBS2499v2 CBS2499_0055 | protein HRT3                                                                                                                                                                                                                                                                                                                                                                                                                                                                         |
| AWRIv2 AWRI_0824       | protein JL09_g3662                                                                                                                                                                                                                                                                                                                                                                                                                                                                   |
| LAMAP LAMAP2480_3684   | protein _1033                                                                                                                                                                                                                                                                                                                                                                                                                                                                        |
| CBS2499v2 CBS2499_0082 | protein _1033                                                                                                                                                                                                                                                                                                                                                                                                                                                                        |
| AWRIv2 AWRI_0848       | protein _1033                                                                                                                                                                                                                                                                                                                                                                                                                                                                        |

|                        |                                                                                                                                                                                                                                                         |
|------------------------|---------------------------------------------------------------------------------------------------------------------------------------------------------------------------------------------------------------------------------------------------------|
| LAMAP LAMAP2480_3693   | integral inner membrane protein required for membrane insertion of C-terminus of Cox2p; interacts genetically and physically with Mss2p and Pnt1p; similar to <i>S. cerevisiae</i> Oxa1, <i>N. crassa</i> Oxa2p, and <i>E. coli</i> YidC                |
| CBS2499v2 CBS2499_0928 | required for membrane insertion of C-terminus of Cox2p; mitochondrial integral inner membrane protein; interacts genetically and physically with Mss2p and Pnt1p; similar to <i>S. cerevisiae</i> Oxa1, <i>N. crassa</i> Oxa2p, and <i>E. coli</i> YidC |
| AWRIv2 AWRI_2498       | required for membrane insertion of C-terminus of Cox2p; mitochondrial integral inner membrane protein; interacts genetically and physically with Mss2p and Pnt1p; similar to <i>S. cerevisiae</i> Oxa1, <i>N. crassa</i> Oxa2p, and <i>E. coli</i> YidC |
| LAMAP LAMAP2480_3700   | protein                                                                                                                                                                                                                                                 |
| CBS2499v2 CBS2499_0921 | protein JL09_g666                                                                                                                                                                                                                                       |
| AWRIv2 AWRI_2504       | protein JL09_g666                                                                                                                                                                                                                                       |
| LAMAP LAMAP2480_3702   | protease 2                                                                                                                                                                                                                                              |
| CBS2499v2 CBS2499_0918 | protease 2                                                                                                                                                                                                                                              |
| AWRIv2 AWRI_2507       | protease 2                                                                                                                                                                                                                                              |
| LAMAP LAMAP2480_3705   | aldehyde-forming enzyme                                                                                                                                                                                                                                 |
| CBS2499v2 CBS2499_0915 | lipoprotein A (RlpA)-like double-psi beta-barrel                                                                                                                                                                                                        |
| AWRIv2 AWRI_2510       | lipoprotein A (RlpA)-like double-psi beta-barrel                                                                                                                                                                                                        |
| LAMAP LAMAP2480_3708   | protein                                                                                                                                                                                                                                                 |
| CBS2499v2 CBS2499_0912 | protein                                                                                                                                                                                                                                                 |
| AWRIv2 AWRI_2512       | protein                                                                                                                                                                                                                                                 |
| LAMAP LAMAP2480_3717   | oxidase                                                                                                                                                                                                                                                 |
| CBS2499v2 CBS2499_0904 | oxidase                                                                                                                                                                                                                                                 |
| AWRIv2 AWRI_2518       | oxidase                                                                                                                                                                                                                                                 |
| LAMAP LAMAP2480_3724   | recognition complex subunit 1                                                                                                                                                                                                                           |
| CBS2499v2 CBS2499_0897 | recognition complex subunit 1                                                                                                                                                                                                                           |
| AWRIv2 AWRI_2523       | recognition complex subunit 1                                                                                                                                                                                                                           |
| LAMAP LAMAP2480_3730   | peptidase complex subunit SPC2                                                                                                                                                                                                                          |
| CBS2499v2 CBS2499_0889 | peptidase complex subunit SPC2                                                                                                                                                                                                                          |
| AWRIv2 AWRI_2531       | peptidase complex subunit SPC2                                                                                                                                                                                                                          |
| LAMAP LAMAP2480_3734   | protein _3045                                                                                                                                                                                                                                           |
| CBS2499v2 CBS2499_0885 | protein _3045                                                                                                                                                                                                                                           |
| AWRIv2 AWRI_2534       | protein _3045                                                                                                                                                                                                                                           |
| LAMAP LAMAP2480_3738   | RNA-processing protein 1                                                                                                                                                                                                                                |
| CBS2499v2 CBS2499_0881 | RNA-processing protein 1                                                                                                                                                                                                                                |
| AWRIv2 AWRI_2538       | RNA processing protein 1 homolog B                                                                                                                                                                                                                      |
| LAMAP LAMAP2480_3751   | factor 39                                                                                                                                                                                                                                               |
| CBS2499v2 CBS2499_0867 | factor 39                                                                                                                                                                                                                                               |
| AWRIv2 AWRI_0004       | factor 39                                                                                                                                                                                                                                               |
| LAMAP LAMAP2480_3755   | protein _0009                                                                                                                                                                                                                                           |
| CBS2499v2 CBS2499_0862 | protein _0009                                                                                                                                                                                                                                           |
| AWRIv2 AWRI_0008       | protein _0009                                                                                                                                                                                                                                           |

LAMAP|LAMAP2480\_3757

CBS2499v2|CBS2499\_0860  
AWRIv2|AWRI\_0009  
LAMAP|LAMAP2480\_3766  
CBS2499v2|CBS2499\_2609  
AWRIv2|AWRI\_3949  
LAMAP|LAMAP2480\_3800  
CBS2499v2|CBS2499\_2574  
AWRIv2|AWRI\_0584  
LAMAP|LAMAP2480\_3803  
CBS2499v2|CBS2499\_2571  
AWRIv2|AWRI\_0580  
LAMAP|LAMAP2480\_3824  
CBS2499v2|CBS2499\_1717  
AWRIv2|AWRI\_1418  
LAMAP|LAMAP2480\_3864  
CBS2499v2|CBS2499\_1749  
AWRIv2|AWRI\_1445  
LAMAP|LAMAP2480\_3869  
CBS2499v2|CBS2499\_1754  
AWRIv2|AWRI\_1449

LAMAP|LAMAP2480\_3875  
CBS2499v2|CBS2499\_1761  
AWRIv2|AWRI\_1452  
LAMAP|LAMAP2480\_3886  
CBS2499v2|CBS2499\_1772  
AWRIv2|AWRI\_1459  
LAMAP|LAMAP2480\_3903  
CBS2499v2|CBS2499\_1790  
AWRIv2|AWRI\_1472  
LAMAP|LAMAP2480\_3938  
CBS2499v2|CBS2499\_2174  
AWRIv2|AWRI\_2875

LAMAP|LAMAP2480\_3944

**of the multi-drug and toxin extrusion (MATE) family of the multidrug/oligosaccharidyl-lipid/polysaccharide (MOP) exporter superfamily; overproduction confers ethionine resistance and accumulation of S-adenosylmethionine**

of the multi-drug and toxin extrusion (MATE) family; the MATE family is part of the multidrug/oligosaccharidyl-lipid/polysaccharide (MOP) exporter superfamily; overproduction confers ethionine resistance and accumulation of S-adenosylmethionine  
efflux family protein  
HYM1  
HYM1  
HYM1  
RNA polymerase I subunit RPA43  
RNA polymerase I subunit RPA43  
RNA polymerase I subunit RPA43  
factor IWS1  
factor IWS1  
factor IWS1  
induction protein kinase IME2/SME1  
induction protein kinase IME2/SME1  
induction protein kinase IME2/SME1  
glucosyltransferase  
glucosyltransferase  
glucosyltransferase  
protein 1  
protein 1  
protein 1

ligase, involved in the modification of mitochondrial enzymes by the attachment of lipoic acid groups  
transferase  
transferase  
protein \_1734  
protein \_1734  
protein \_1734  
protein \_1749  
protein \_1749  
protein \_1749  
family protein  
family protein  
family protein

conserved mitochondrial protein, essential for t6A modification of mitochondrial tRNAs that decode ANN codons; similar to Kae1p and E. coli YgjD, both of which are also required for tRNA t6A modification

|                        |                                                                                                                                                                                                                                                                                                                                                                                                                                                            |
|------------------------|------------------------------------------------------------------------------------------------------------------------------------------------------------------------------------------------------------------------------------------------------------------------------------------------------------------------------------------------------------------------------------------------------------------------------------------------------------|
| CBS2499v2 CBS2499_2168 | involved in threonylcarbamoyl adenosine biosynthesis; Sua5p and Qri7p are necessary and sufficient for RNA t6A modification in vitro; highly conserved mitochondrial protein; essential for t6A modification of mitochondrial tRNAs that decode ANN codons; similar to Kae1p and E. coli YgjD, both of which are also required for tRNA t6A modification; when directed to the cytoplasm, complements the essential function of Kae1p in the KEOPS complex |
| AWRIv2 AWRI_2881       | involved in threonylcarbamoyl adenosine biosynthesis; Sua5p and Qri7p are necessary and sufficient for RNA t6A modification in vitro; highly conserved mitochondrial protein; essential for t6A modification of mitochondrial tRNAs that decode ANN codons; similar to Kae1p and E. coli YgjD, both of which are also required for tRNA t6A modification; when directed to the cytoplasm, complements the essential function of Kae1p in the KEOPS complex |
| LAMAP LAMAP2480_3945   | protein _3466                                                                                                                                                                                                                                                                                                                                                                                                                                              |
| CBS2499v2 CBS2499_2167 | protein _3466                                                                                                                                                                                                                                                                                                                                                                                                                                              |
| AWRIv2 AWRI_2882       | protein _3466                                                                                                                                                                                                                                                                                                                                                                                                                                              |
| LAMAP LAMAP2480_3955   | domain-containing protein CBSCBSPB3                                                                                                                                                                                                                                                                                                                                                                                                                        |
| CBS2499v2 CBS2499_2158 | domain-containing protein CBSCBSPB3                                                                                                                                                                                                                                                                                                                                                                                                                        |
| AWRIv2 AWRI_2891       | domain-containing protein CBSCBSPB3                                                                                                                                                                                                                                                                                                                                                                                                                        |
| LAMAP LAMAP2480_3972   | factor atf1                                                                                                                                                                                                                                                                                                                                                                                                                                                |
| CBS2499v2 CBS2499_1538 | factor atf1                                                                                                                                                                                                                                                                                                                                                                                                                                                |
| AWRIv2 AWRI_2671       | <b>osmotic stress response (OSM) domain</b>                                                                                                                                                                                                                                                                                                                                                                                                                |
| LAMAP LAMAP2480_3977   | RNA-processing protein 7                                                                                                                                                                                                                                                                                                                                                                                                                                   |
| CBS2499v2 CBS2499_1533 | RNA-processing protein 7                                                                                                                                                                                                                                                                                                                                                                                                                                   |
| AWRIv2 AWRI_2675       | RNA-processing protein 7                                                                                                                                                                                                                                                                                                                                                                                                                                   |
| LAMAP LAMAP2480_3978   | STE50                                                                                                                                                                                                                                                                                                                                                                                                                                                      |
| CBS2499v2 CBS2499_1532 | STE50                                                                                                                                                                                                                                                                                                                                                                                                                                                      |
| AWRIv2 AWRI_2676       | STE50                                                                                                                                                                                                                                                                                                                                                                                                                                                      |
| LAMAP LAMAP2480_3981   | synthase, catalyzes pseudouridylation at positions 35 and 56 in U2 snRNA, position 50 in 5S rRNA, position 13 in cytoplasmic tRNAs, and position 35 in pre-tRNA(Tyr); conserved in archaea, vertebrates, and some bacteria                                                                                                                                                                                                                                 |
| CBS2499v2 CBS2499_1529 | pseudouridine synthase, TruD family                                                                                                                                                                                                                                                                                                                                                                                                                        |
| AWRIv2 AWRI_3944       | synthase; catalyzes pseudouridylation at positions 35 and 56 in U2 snRNA, position 50 in 5S rRNA, position 13 in cytoplasmic tRNAs, and position 35 in pre-tRNA(Tyr); also pseudouridylates some mRNAs; relocates from nucleus to cytoplasm during heat shock and differentially modifies some mRNAs during heat shock; conserved in archaea, vertebrates, and some bacteria                                                                               |
| LAMAP LAMAP2480_3985   | of evolutionarily-conserved CCR4-NOT regulatory complex; contains single ABC-type ATPase domain but no transmembrane domain; interacts with several subunits of Mediator                                                                                                                                                                                                                                                                                   |
| CBS2499v2 CBS2499_1523 | ABC transporter ATP-binding protein C20G4.01                                                                                                                                                                                                                                                                                                                                                                                                               |
| AWRIv2 AWRI_3939       | of evolutionarily-conserved CCR4-NOT regulatory complex; contains single ABC-type ATPase domain but no transmembrane domain; interacts with several subunits of Mediator                                                                                                                                                                                                                                                                                   |
| LAMAP LAMAP2480_4034   | oxidoreductase 2                                                                                                                                                                                                                                                                                                                                                                                                                                           |
| CBS2499v2 CBS2499_0526 | oxidoreductase 2                                                                                                                                                                                                                                                                                                                                                                                                                                           |
| AWRIv2 AWRI_2390       | protein                                                                                                                                                                                                                                                                                                                                                                                                                                                    |
| LAMAP LAMAP2480_4036   | protein, cytoplasmic and nuclear                                                                                                                                                                                                                                                                                                                                                                                                                           |
| CBS2499v2 CBS2499_0524 | binding domain-containing protein                                                                                                                                                                                                                                                                                                                                                                                                                          |
| AWRIv2 AWRI_2391       | binding domain-containing protein                                                                                                                                                                                                                                                                                                                                                                                                                          |

|                        |                                                                                                                                                                                                                                                                                                                   |
|------------------------|-------------------------------------------------------------------------------------------------------------------------------------------------------------------------------------------------------------------------------------------------------------------------------------------------------------------|
| LAMAP LAMAP2480_4038   | protein YEL043W                                                                                                                                                                                                                                                                                                   |
| CBS2499v2 CBS2499_0522 | protein YEL043W                                                                                                                                                                                                                                                                                                   |
| AWRIv2 AWRI_2393       | protein                                                                                                                                                                                                                                                                                                           |
| LAMAP LAMAP2480_4043   | protein _4611                                                                                                                                                                                                                                                                                                     |
| CBS2499v2 CBS2499_0518 | protein _4611                                                                                                                                                                                                                                                                                                     |
| AWRIv2 AWRI_3865       | protein _4611                                                                                                                                                                                                                                                                                                     |
| LAMAP LAMAP2480_4044   | protein                                                                                                                                                                                                                                                                                                           |
| CBS2499v2 CBS2499_0517 | protein                                                                                                                                                                                                                                                                                                           |
| AWRIv2 AWRI_3864       | protein                                                                                                                                                                                                                                                                                                           |
|                        | subunit of the Translocase of the Inner Mitochondrial membrane (TIM23 complex); interacts with the Translocase of the Outer Mitochondrial membrane (TOM complex) and with respiratory enzymes; may regulate TIM23 complex activity                                                                                |
| LAMAP LAMAP2480_4076   | import inner membrane translocase subunit TIM21                                                                                                                                                                                                                                                                   |
| CBS2499v2 CBS2499_2862 | import inner membrane translocase subunit TIM21                                                                                                                                                                                                                                                                   |
| AWRIv2 AWRI_2931       |                                                                                                                                                                                                                                                                                                                   |
| LAMAP LAMAP2480_4079   | nucleotide exchange factor LTE1                                                                                                                                                                                                                                                                                   |
| CBS2499v2 CBS2499_2865 | nucleotide exchange factor LTE1                                                                                                                                                                                                                                                                                   |
| AWRIv2 AWRI_2933       | nucleotide exchange factor LTE1                                                                                                                                                                                                                                                                                   |
| LAMAP LAMAP2480_4081   | protein _3520                                                                                                                                                                                                                                                                                                     |
| CBS2499v2 CBS2499_2866 | protein _3520                                                                                                                                                                                                                                                                                                     |
| AWRIv2 AWRI_2934       | protein _3520                                                                                                                                                                                                                                                                                                     |
|                        | membrane receptor protein (v-SNARE) involved in the fusion between Golgi-derived secretory vesicles with the plasma membrane; proposed to be involved in endocytosis; member of the synaptobrevin/VAMP family of R-type v-SNARE proteins                                                                          |
| LAMAP LAMAP2480_4084   |                                                                                                                                                                                                                                                                                                                   |
|                        | membrane receptor protein (v-SNARE); involved in the fusion between Golgi-derived secretory vesicles with the plasma membrane; proposed to be involved in endocytosis; member of the synaptobrevin/VAMP family of R-type v-SNARE proteins; SNC1 has a paralog, SNC2, that arose from the whole genome duplication |
| CBS2499v2 CBS2499_2868 |                                                                                                                                                                                                                                                                                                                   |
|                        | membrane receptor protein (v-SNARE); involved in the fusion between Golgi-derived secretory vesicles with the plasma membrane; proposed to be involved in endocytosis; member of the synaptobrevin/VAMP family of R-type v-SNARE proteins; SNC1 has a paralog, SNC2, that arose from the whole genome duplication |
| AWRIv2 AWRI_2936       | secreted protein                                                                                                                                                                                                                                                                                                  |
| LAMAP LAMAP2480_4090   | <b>nucleoside permease</b>                                                                                                                                                                                                                                                                                        |
| CBS2499v2 CBS2499_2873 | nucleoside permease                                                                                                                                                                                                                                                                                               |
| AWRIv2 AWRI_2942       | a carrier protein involved in nuclear import of proteins; importin beta homolog                                                                                                                                                                                                                                   |
| LAMAP LAMAP2480_4097   | mRNA decay protein 5                                                                                                                                                                                                                                                                                              |
| CBS2499v2 CBS2499_2877 | mRNA decay protein 5                                                                                                                                                                                                                                                                                              |
| AWRIv2 AWRI_2946       | protein _3543                                                                                                                                                                                                                                                                                                     |
| LAMAP LAMAP2480_4109   | protein _3543                                                                                                                                                                                                                                                                                                     |
| CBS2499v2 CBS2499_2888 | protein _3543                                                                                                                                                                                                                                                                                                     |
| AWRIv2 AWRI_2957       | transferase type-2 subunit alpha                                                                                                                                                                                                                                                                                  |
| LAMAP LAMAP2480_4115   | transferase type-2 subunit alpha                                                                                                                                                                                                                                                                                  |
| CBS2499v2 CBS2499_2899 | transferase type-2 subunit alpha                                                                                                                                                                                                                                                                                  |
| AWRIv2 AWRI_2972       | kinase subunit beta                                                                                                                                                                                                                                                                                               |
| LAMAP LAMAP2480_4116   |                                                                                                                                                                                                                                                                                                                   |

|                        |                                                                                                                                                                                                                                                                                                                                                                                     |   |
|------------------------|-------------------------------------------------------------------------------------------------------------------------------------------------------------------------------------------------------------------------------------------------------------------------------------------------------------------------------------------------------------------------------------|---|
| CBS2499v2 CBS2499_2900 | kinase subunit beta                                                                                                                                                                                                                                                                                                                                                                 |   |
| AWRIv2 AWRI_2973       | protein HPODL_02414                                                                                                                                                                                                                                                                                                                                                                 |   |
| LAMAP LAMAP2480_4119   | specific transcription factor domain                                                                                                                                                                                                                                                                                                                                                |   |
| CBS2499v2 CBS2499_2908 | specific transcription factor domain                                                                                                                                                                                                                                                                                                                                                |   |
| AWRIv2 AWRI_2981       | specific transcription factor domain                                                                                                                                                                                                                                                                                                                                                |   |
| LAMAP LAMAP2480_4121   | debranching enzyme                                                                                                                                                                                                                                                                                                                                                                  |   |
| CBS2499v2 CBS2499_2911 | debranching enzyme                                                                                                                                                                                                                                                                                                                                                                  |   |
|                        | lariat debranching enzyme; catalyzes debranching of lariat introns formed during pre-mRNA splicing; required for efficient Ty1 transposition; knockdown of human homolog Dbr1 rescues toxicity of RNA-binding proteins TDP-43 and FUS which are implicated in amyotrophic lateral sclerosis (ALS), suggests potential therapeutic target for ALS and related TDP-43 proteinopathies |   |
| AWRIv2 AWRI_2985       |                                                                                                                                                                                                                                                                                                                                                                                     | 3 |
| LAMAP LAMAP2480_4125   |                                                                                                                                                                                                                                                                                                                                                                                     | 3 |
| CBS2499v2 CBS2499_2920 |                                                                                                                                                                                                                                                                                                                                                                                     | 3 |
| AWRIv2 AWRI_2996       |                                                                                                                                                                                                                                                                                                                                                                                     | 3 |
| LAMAP LAMAP2480_4140   | repeat-containing protein SOG2                                                                                                                                                                                                                                                                                                                                                      |   |
| CBS2499v2 CBS2499_2939 | repeat-containing protein SOG2                                                                                                                                                                                                                                                                                                                                                      |   |
| AWRIv2 AWRI_3013       | repeat-containing protein SOG2                                                                                                                                                                                                                                                                                                                                                      |   |
| LAMAP LAMAP2480_4167   | -mannosyltransferase                                                                                                                                                                                                                                                                                                                                                                |   |
| CBS2499v2 CBS2499_1082 |                                                                                                                                                                                                                                                                                                                                                                                     | 3 |
| AWRIv2 AWRI_0614       |                                                                                                                                                                                                                                                                                                                                                                                     | 4 |
| LAMAP LAMAP2480_4205   | ribosomal protein L15, mitochondrial                                                                                                                                                                                                                                                                                                                                                |   |
| CBS2499v2 CBS2499_0093 | ribosomal protein L15, mitochondrial                                                                                                                                                                                                                                                                                                                                                |   |
| AWRIv2 AWRI_0860       | ribosomal protein L15, mitochondrial                                                                                                                                                                                                                                                                                                                                                |   |
| LAMAP LAMAP2480_4268   | midA homolog                                                                                                                                                                                                                                                                                                                                                                        |   |
| CBS2499v2 CBS2499_1651 | dehydrogenase [ubiquinone] complex I, assembly factor 7 homolog                                                                                                                                                                                                                                                                                                                     |   |
| AWRIv2 AWRI_2163       | dehydrogenase [ubiquinone] complex I, assembly factor 7 homolog                                                                                                                                                                                                                                                                                                                     |   |
| LAMAP LAMAP2480_4272   | protein YCR015C                                                                                                                                                                                                                                                                                                                                                                     |   |
| CBS2499v2 CBS2499_1642 | protein YCR015C                                                                                                                                                                                                                                                                                                                                                                     |   |
| AWRIv2 AWRI_2156       | hydrolase                                                                                                                                                                                                                                                                                                                                                                           |   |
| LAMAP LAMAP2480_4277   | 3-methyltransferase                                                                                                                                                                                                                                                                                                                                                                 |   |
| CBS2499v2 CBS2499_1635 | 3-methyltransferase                                                                                                                                                                                                                                                                                                                                                                 |   |
| AWRIv2 AWRI_2151       | 3-methyltransferase                                                                                                                                                                                                                                                                                                                                                                 |   |
|                        | alpha-keto amide reductase; reduces aromatic alpha-keto amides, aliphatic alpha-keto esters, and aromatic alpha-keto esters; member of the aldo-keto reductase (AKR) family                                                                                                                                                                                                         |   |
| LAMAP LAMAP2480_4295   | alpha-keto amide reductase; reduces aromatic alpha-keto amides, aliphatic alpha-keto esters, and aromatic alpha-keto esters; member of the aldo-keto reductase (AKR) family; protein abundance increases in response to DNA replication stress                                                                                                                                      |   |
| CBS2499v2 CBS2499_1608 | alpha-keto amide reductase; reduces aromatic alpha-keto amides, aliphatic alpha-keto esters, and aromatic alpha-keto esters; member of the aldo-keto reductase (AKR) family; protein abundance increases in response to DNA replication stress                                                                                                                                      |   |
| AWRIv2 AWRI_2131       | enzyme is ATP-dependent and functions as a dimer; similar to mouse Oplah gene; green fluorescent protein (GFP)-fusion protein localizes to the cytoplasm                                                                                                                                                                                                                            |   |
| LAMAP LAMAP2480_4312   |                                                                                                                                                                                                                                                                                                                                                                                     |   |

CBS2499v2|CBS2499\_2190

AWRIv2|AWRI\_3622  
LAMAP|LAMAP2480\_4314  
CBS2499v2|CBS2499\_2192  
AWRIv2|AWRI\_3623  
LAMAP|LAMAP2480\_4316  
CBS2499v2|CBS2499\_2194  
AWRIv2|AWRI\_3625  
LAMAP|LAMAP2480\_4331  
CBS2499v2|CBS2499\_3212  
AWRIv2|AWRI\_1930  
LAMAP|LAMAP2480\_4336  
CBS2499v2|CBS2499\_3207  
AWRIv2|AWRI\_1926  
LAMAP|LAMAP2480\_4338  
CBS2499v2|CBS2499\_3205  
AWRIv2|AWRI\_1925  
LAMAP|LAMAP2480\_4339  
CBS2499v2|CBS2499\_3204  
AWRIv2|AWRI\_1924  
LAMAP|LAMAP2480\_4365  
CBS2499v2|CBS2499\_3182  
AWRIv2|AWRI\_1900  
LAMAP|LAMAP2480\_4372  
CBS2499v2|CBS2499\_3175  
AWRIv2|AWRI\_1894  
LAMAP|LAMAP2480\_4383  
CBS2499v2|CBS2499\_4391  
AWRIv2|AWRI\_4167  
LAMAP|LAMAP2480\_4400  
CBS2499v2|CBS2499\_4376  
AWRIv2|AWRI\_4074  
LAMAP|LAMAP2480\_4412  
CBS2499v2|CBS2499\_3700  
AWRIv2|AWRI\_1186  
LAMAP|LAMAP2480\_4423  
CBS2499v2|CBS2499\_3708  
AWRIv2|AWRI\_1177  
LAMAP|LAMAP2480\_4535  
CBS2499v2|CBS2499\_4528

enzyme is ATP-dependent and functions as a dimer; similar to mouse Oplah gene; green fluorescent protein (GFP)-fusion protein localizes to the cytoplasm; protein abundance increases in response to DNA replication stress

enzyme is ATP-dependent and functions as a dimer; similar to mouse Oplah gene; green fluorescent protein (GFP)-fusion protein localizes to the cytoplasm; protein abundance increases in response to DNA replication stress

activator HAP3

activator HAP3

activator HAP3

inheritance rate of mitochondria protein 38

supercomplex factor 2, mitochondrial

supercomplex factor 2, mitochondrial

protein \_2303

protein \_2303

protein \_2303

**shock factor protein**

shock transcription factor

shock transcription factor

transporter MCH2

**transporter ESBP6**

transporter ESBP6

transporter ESBP6

transporter ESBP6

transporter ESBP6

site selection protein 22

site selection protein 22

site selection protein

ribosome biogenesis protein C8F11.04

ribosome biogenesis protein C8F11.04

ribosome biogenesis protein C8F11.04

protein TCA17

protein TCA17

membrane protein yol092w

ribosomal protein S24, mitochondrial

ribosomal protein S24, mitochondrial

ribosomal protein S24, mitochondrial

complex exonuclease RRP6

complex exonuclease RRP6

complex exonuclease RRP6

transcriptional regulator ZAP1

transcriptional regulator ZAP1

finger protein csr1p

complex component snt2

complex component snt2

|                        |                                                                                                                                                                                                                                                                                                                                                      |
|------------------------|------------------------------------------------------------------------------------------------------------------------------------------------------------------------------------------------------------------------------------------------------------------------------------------------------------------------------------------------------|
| AWRIv2 AWRI_1044       | complex component snt2                                                                                                                                                                                                                                                                                                                               |
| LAMAP LAMAP2480_4545   | protein C3orf37 homolog                                                                                                                                                                                                                                                                                                                              |
| CBS2499v2 CBS2499_4538 | peptidase YMR114C                                                                                                                                                                                                                                                                                                                                    |
| AWRIv2 AWRI_1053       | peptidase YMR114C                                                                                                                                                                                                                                                                                                                                    |
|                        | DNA helicase involved in sister-chromatid cohesion and genome integrity; interacts with ECO1 and CTF18; mutants are defective in silencing, rDNA recombination, aging and the heat shock response; FANCI-like helicase family member                                                                                                                 |
| LAMAP LAMAP2480_4558   | DNA helicase; involved in sister-chromatid cohesion and genome integrity and interstrand cross-link repair; interacts with ECO1 and CTF18; mutants are defective in silencing, rDNA recombination, aging and the heat shock response; FANCI-like helicase family member; mutations in the human homolog, DDX11/ChLR1, cause Warsaw breakage syndrome |
| CBS2499v2 CBS2499_4402 | DNA helicase; involved in sister-chromatid cohesion and genome integrity and interstrand cross-link repair; interacts with ECO1 and CTF18; mutants are defective in silencing, rDNA recombination, aging and the heat shock response; FANCI-like helicase family member; mutations in the human homolog, DDX11/ChLR1, cause Warsaw breakage syndrome |
|                        | transporter YBR287W                                                                                                                                                                                                                                                                                                                                  |
| AWRIv2 AWRI_2081       | transporter YBR287W                                                                                                                                                                                                                                                                                                                                  |
| LAMAP LAMAP2480_4565   | transporter YBR287W                                                                                                                                                                                                                                                                                                                                  |
| CBS2499v2 CBS2499_4410 | cofactor synthesis domain                                                                                                                                                                                                                                                                                                                            |
| AWRIv2 AWRI_2084       | cofactor synthesis domain                                                                                                                                                                                                                                                                                                                            |
| LAMAP LAMAP2480_4579   | cofactor synthesis domain                                                                                                                                                                                                                                                                                                                            |
| CBS2499v2 CBS2499_4424 | SNQ2                                                                                                                                                                                                                                                                                                                                                 |
| AWRIv2 AWRI_2097       | SNQ2                                                                                                                                                                                                                                                                                                                                                 |
| LAMAP LAMAP2480_4583   | SNQ2                                                                                                                                                                                                                                                                                                                                                 |
| CBS2499v2 CBS2499_4428 | ribosomal protein S22, mitochondrial                                                                                                                                                                                                                                                                                                                 |
| AWRIv2 AWRI_2103       | ribosomal protein S22, mitochondrial                                                                                                                                                                                                                                                                                                                 |
| LAMAP LAMAP2480_4592   | ribosomal protein S22, mitochondrial                                                                                                                                                                                                                                                                                                                 |
| CBS2499v2 CBS2499_4437 | interactive domain-containing protein 4B                                                                                                                                                                                                                                                                                                             |
| AWRIv2 AWRI_2111       | interactive domain-containing protein 4B                                                                                                                                                                                                                                                                                                             |
| LAMAP LAMAP2480_4611   | chromatin-remodeling complex subunit SWI1                                                                                                                                                                                                                                                                                                            |
| CBS2499v2 CBS2499_0392 | with methylenetetrahydrofolate reductase (MTHFR) activity in vitro; null mutant has no phenotype and is prototrophic for methionine; MET13 encodes major isozyme of MTHFR                                                                                                                                                                            |
| AWRIv2 AWRI_3718       | with MTHFR activity in vitro; null mutant has no phenotype and is prototrophic for methionine; MET13 encodes major isozyme of methylenetetrahydrofolate reductase (MTHFR)                                                                                                                                                                            |
| LAMAP LAMAP2480_4613   | with MTHFR activity in vitro; null mutant has no phenotype and is prototrophic for methionine; MET13 encodes major isozyme of methylenetetrahydrofolate reductase (MTHFR)                                                                                                                                                                            |
| CBS2499v2 CBS2499_0394 | cytoskeleton-regulatory complex protein END3                                                                                                                                                                                                                                                                                                         |
|                        | cytoskeleton-regulatory complex protein END3                                                                                                                                                                                                                                                                                                         |
| AWRIv2 AWRI_3715       | cytoskeleton-regulatory complex protein END3                                                                                                                                                                                                                                                                                                         |
| LAMAP LAMAP2480_4615   | repair/transcription protein mms19                                                                                                                                                                                                                                                                                                                   |
| CBS2499v2 CBS2499_0395 | repair/transcription protein mms19                                                                                                                                                                                                                                                                                                                   |
| AWRIv2 AWRI_3714       | repair/transcription protein MET18/MMS19                                                                                                                                                                                                                                                                                                             |
| LAMAP LAMAP2480_4617   |                                                                                                                                                                                                                                                                                                                                                      |
| CBS2499v2 CBS2499_0397 |                                                                                                                                                                                                                                                                                                                                                      |
| AWRIv2 AWRI_3712       |                                                                                                                                                                                                                                                                                                                                                      |

|                                                                                                                                                                                                                                                              |                                                                                                                                                                                                                                                                                                                                                                                                                                                                                                                                                                                                                                                                                                   |
|--------------------------------------------------------------------------------------------------------------------------------------------------------------------------------------------------------------------------------------------------------------|---------------------------------------------------------------------------------------------------------------------------------------------------------------------------------------------------------------------------------------------------------------------------------------------------------------------------------------------------------------------------------------------------------------------------------------------------------------------------------------------------------------------------------------------------------------------------------------------------------------------------------------------------------------------------------------------------|
| LAMAP LAMAP2480_4624                                                                                                                                                                                                                                         | protein of unknown function with strong similarity to alanyl-tRNA synthases from Eubacteria; green fluorescent protein (GFP)-fusion protein localizes to the cytoplasm; YNL040W is not an essential gene                                                                                                                                                                                                                                                                                                                                                                                                                                                                                          |
| CBS2499v2 CBS2499_0402<br>AWRIv2 AWRI_3707<br>LAMAP LAMAP2480_4626<br>CBS2499v2 CBS2499_0404<br>AWRIv2 AWRI_3704                                                                                                                                             | protein of unknown function; has strong similarity to alanyl-tRNA synthases from Eubacteria; null mutant displays decreased translation rate and increased readthrough of premature stop codons; green fluorescent protein (GFP)-fusion protein localizes to the cytoplasm; YNL040W is not an essential gene<br>alanyl-tRNA editing protein alaX<br>protein YDR333C<br>quality control complex subunit 1<br>quality control complex subunit 1                                                                                                                                                                                                                                                     |
| LAMAP LAMAP2480_4639                                                                                                                                                                                                                                         | protein containing three calcium and lipid binding domains; non-tagged protein localizes to mitochondria and GFP-fusion protein localizes to the cell periphery; C-termini of Tcb1p, Tcb2p and Tcb3p interact<br><br>ER protein involved in ER-plasma membrane tethering; one of 6 proteins (Ist2p, Scs2p, Scs22p, Tcb1p, Tcb2p, Tcb3p) that connect ER to plasma membrane and regulate PI4P levels by controlling access of Sac1p phosphatase to its substrate PI4P in PM; contains 3 calcium and lipid binding domains; non-tagged protein also localizes to mitochondria; C-termini of Tcb1p, Tcb2p and Tcb3p interact; TCB1 has a paralog, TCB2, that arose from the whole genome duplication |
| CBS2499v2 CBS2499_0416<br>AWRIv2 AWRI_4036<br>LAMAP LAMAP2480_4644<br>CBS2499v2 CBS2499_0422<br>AWRIv2 AWRI_4039<br>LAMAP LAMAP2480_4681<br>CBS2499v2 CBS2499_0298<br>AWRIv2 AWRI_1986<br>LAMAP LAMAP2480_4696<br>CBS2499v2 CBS2499_3885<br>AWRIv2 AWRI_1877 | complex component SEC10<br>complex component SEC10<br>complex component SEC10<br>complex subunit DAD2<br>complex subunit DAD2<br>complex subunit DAD2<br>protein _2245<br>protein _2245<br>protein _2245                                                                                                                                                                                                                                                                                                                                                                                                                                                                                          |
| LAMAP LAMAP2480_4720                                                                                                                                                                                                                                         | synthase, introduces pseudouridines at position 38 or 39 in tRNA, important for maintenance of translation efficiency and normal cell growth, localizes to both the nucleus and cytoplasm; non-essential for viability                                                                                                                                                                                                                                                                                                                                                                                                                                                                            |
| CBS2499v2 CBS2499_5027                                                                                                                                                                                                                                       | synthase; introduces pseudouridines at position 38 or 39 in tRNA; also responsible for pseudouracil modification of some mRNAs; important for maintenance of translation efficiency and normal cell growth, localizes to both the nucleus and cytoplasm; non-essential for viability                                                                                                                                                                                                                                                                                                                                                                                                              |
| AWRIv2 AWRI_4141<br>LAMAP LAMAP2480_4734<br>CBS2499v2 CBS2499_4818<br>AWRIv2 AWRI_3393<br>LAMAP LAMAP2480_4746<br>CBS2499v2 CBS2499_1971<br>AWRIv2 AWRI_1599                                                                                                 | synthase; introduces pseudouridines at position 38 or 39 in tRNA; also responsible for pseudouracil modification of some mRNAs; important for maintenance of translation efficiency and normal cell growth, localizes to both the nucleus and cytoplasm; non-essential for viability<br>exonuclease C637.09<br>exonuclease C637.09<br>exonuclease 1<br>of RNA polymerase II transcription subunit 8<br>of RNA polymerase II transcription subunit 8<br>of RNA polymerase II transcription subunit 8                                                                                                                                                                                               |

|                                                                                                                                                                                                                                    |                                                                                                                                                                                                                                                                                                                                                                                                                                    |
|------------------------------------------------------------------------------------------------------------------------------------------------------------------------------------------------------------------------------------|------------------------------------------------------------------------------------------------------------------------------------------------------------------------------------------------------------------------------------------------------------------------------------------------------------------------------------------------------------------------------------------------------------------------------------|
| LAMAP LAMAP2480_4753                                                                                                                                                                                                               | thioesterase responsible for depalmitoylation of Gpa1p; green fluorescent protein (GFP)-fusion protein localizes to both the cytoplasm and nucleus and is induced in response to the DNA-damaging agent MMS                                                                                                                                                                                                                        |
| CBS2499v2 CBS2499_1964                                                                                                                                                                                                             | thioesterase responsible for depalmitoylation of Gpa1p; green fluorescent protein (GFP)-fusion protein localizes to both the cytoplasm and nucleus and is induced in response to the DNA-damaging agent MMS                                                                                                                                                                                                                        |
| AWRIv2 AWRI_1606<br>LAMAP LAMAP2480_4777<br>CBS2499v2 CBS2499_1937<br>AWRIv2 AWRI_1624                                                                                                                                             | thioesterase responsible for depalmitoylation of Gpa1p; green fluorescent protein (GFP)-fusion protein localizes to both the cytoplasm and nucleus and is induced in response to the DNA-damaging agent MMS<br>of RNA polymerase II transcription subunit 4<br>of RNA polymerase II transcription subunit 4<br>of RNA polymerase II transcription subunit 4                                                                        |
| LAMAP LAMAP2480_4778                                                                                                                                                                                                               | lysophospholipid acyltransferase, part of MBOAT family of membrane-bound O-acyltransferases; key component of Lands cycle; may have role in fatty acid exchange at sn-2 position of mature glycerophospholipids<br>lysophospholipid acyltransferase; part of MBOAT family of membrane-bound O-acyltransferases; key component of Lands cycle; may have role in fatty acid exchange at sn-2 position of mature glycerophospholipids |
| CBS2499v2 CBS2499_1936<br>AWRIv2 AWRI_1625<br>LAMAP LAMAP2480_4792<br>CBS2499v2 CBS2499_0793<br>AWRIv2 AWRI_0064<br>LAMAP LAMAP2480_4794<br>CBS2499v2 CBS2499_0795<br>AWRIv2 AWRI_0062                                             | acyltransferase<br>fungal zinc cluster transcription factor<br>fungal zinc cluster transcription factor<br>fungal zinc cluster transcription factor<br>protein _0074<br>protein _0074<br>protein _0074                                                                                                                                                                                                                             |
| LAMAP LAMAP2480_4795                                                                                                                                                                                                               | helicase with limited sequence similarity to human Rb protein; the authentic, non-tagged protein is detected in highly purified mitochondria in high-throughput studies; YLR419W is not an essential gene                                                                                                                                                                                                                          |
| CBS2499v2 CBS2499_0702                                                                                                                                                                                                             | helicase with limited sequence similarity to human Rb protein; the authentic, non-tagged protein is detected in highly purified mitochondria in high-throughput studies; YLR419W is not an essential gene                                                                                                                                                                                                                          |
| AWRIv2 AWRI_0138<br>LAMAP LAMAP2480_4796<br>CBS2499v2 CBS2499_0701<br>AWRIv2 AWRI_0139<br>LAMAP LAMAP2480_4797<br>CBS2499v2 CBS2499_0700<br>AWRIv2 AWRI_0140<br>LAMAP LAMAP2480_4801<br>CBS2499v2 CBS2499_0696<br>AWRIv2 AWRI_0145 | helicase with limited sequence similarity to human Rb protein; the authentic, non-tagged protein is detected in highly purified mitochondria in high-throughput studies; YLR419W is not an essential gene<br>complex subunit 2<br>complex subunit 2<br>complex subunit 2<br>protein 2<br>protein 2<br>protein 2<br>fusion protein MON1<br>fusion protein MON1<br>fusion protein MON1                                               |

LAMAP|LAMAP2480\_4804  
CBS2499v2|CBS2499\_0693  
AWRIv2|AWRI\_0147  
LAMAP|LAMAP2480\_4806  
CBS2499v2|CBS2499\_0691  
AWRIv2|AWRI\_0149  
LAMAP|LAMAP2480\_4810  
CBS2499v2|CBS2499\_0772  
AWRIv2|AWRI\_0085  
LAMAP|LAMAP2480\_4816  
CBS2499v2|CBS2499\_0778  
AWRIv2|AWRI\_0078  
LAMAP|LAMAP2480\_4817  
CBS2499v2|CBS2499\_0779  
AWRIv2|AWRI\_0077  
LAMAP|LAMAP2480\_4826  
CBS2499v2|CBS2499\_0562  
AWRIv2|AWRI\_2374  
LAMAP|LAMAP2480\_4828  
CBS2499v2|CBS2499\_0567  
AWRIv2|AWRI\_2371  
LAMAP|LAMAP2480\_4832  
CBS2499v2|CBS2499\_0572  
AWRIv2|AWRI\_2368  
LAMAP|LAMAP2480\_4834  
CBS2499v2|CBS2499\_0574  
AWRIv2|AWRI\_2365  
LAMAP|LAMAP2480\_4838  
CBS2499v2|CBS2499\_0581  
AWRIv2|AWRI\_2361  
LAMAP|LAMAP2480\_4850  
CBS2499v2|CBS2499\_0594  
AWRIv2|AWRI\_3440  
  
LAMAP|LAMAP2480\_4856  
  
CBS2499v2|CBS2499\_0600  
AWRIv2|AWRI\_3437  
LAMAP|LAMAP2480\_4870  
CBS2499v2|CBS2499\_0620  
AWRIv2|AWRI\_4171  
LAMAP|LAMAP2480\_4879

ser/thr kinase required for vesicle formation in autophagy and the cytoplasm-to-vacuole targeting (Cvt) pathway; structurally required for phagophore assembly site formation; during autophagy forms a complex with Atg13p and Atg17p  
kinase ATG1  
kinase ATG1  
threonine-protein kinase atg1  
threonine-protein kinase atg1  
threonine-protein kinase atg1  
regulatory protein RXT2  
regulatory protein RXT2  
regulatory protein RXT2  
protein YFR016C  
protein YFR016C  
protein \_0091  
universal archaeal KH domain protein  
universal archaeal KH domain protein  
universal archaeal KH domain protein  
protein 20  
protein 20  
protein 20  
  
oxidoreductase, mitochondrial  
oxidoreductase, mitochondrial  
oxidoreductase, mitochondrial  
import and degradation protein 27  
import and degradation protein 27  
import and degradation protein 27  
and cobalt transport protein CorA  
and cobalt transport protein CorA  
and cobalt transport protein CorA  
kinase GIN4  
kinase GIN4  
kinase GIN4  
of the Ssh1 translocon complex; Sec61p homolog involved in co-translational pathway of protein translocation; not essential  
of the Ssh1 translocon complex; Sec61p homolog involved in co-translational pathway of protein translocation; not essential  
sixty-one protein homolog  
recombination centers protein 22  
recombination centers protein 22  
recombination centers protein 22  
**carboxypeptidase yscS; expression is induced under low-nitrogen conditions**

|                                                                                        |                                                                                                                                                                                                                                                                                                                                                                             |
|----------------------------------------------------------------------------------------|-----------------------------------------------------------------------------------------------------------------------------------------------------------------------------------------------------------------------------------------------------------------------------------------------------------------------------------------------------------------------------|
| CBS2499v2 CBS2499_3620<br>AWRIv2 AWRI_2689                                             | carboxypeptidase S; expression is induced under low-nitrogen conditions<br>carboxypeptidase S; expression is induced under low-nitrogen conditions                                                                                                                                                                                                                          |
| LAMAP LAMAP2480_4882                                                                   | FAD transporter; required for uptake of FAD into endoplasmic reticulum; involved in cell wall maintenance                                                                                                                                                                                                                                                                   |
| CBS2499v2 CBS2499_3619                                                                 | FAD transporter; required for uptake of FAD into endoplasmic reticulum; involved in cell wall maintenance;<br>FLC1 has a paralog, FLC3, that arose from the whole genome duplication                                                                                                                                                                                        |
| AWRIv2 AWRI_2690<br>LAMAP LAMAP2480_4883                                               | FAD transporter; required for uptake of FAD into endoplasmic reticulum; involved in cell wall maintenance;<br>FLC1 has a paralog, FLC3, that arose from the whole genome duplication<br>ERP1                                                                                                                                                                                |
| CBS2499v2 CBS2499_3618<br>AWRIv2 AWRI_2691                                             | of the p24 family involved in ER to Golgi transport; role in misfolded protein quality control; forms heterotrimeric complex with Erp2p, Emp24p, and Erv25p; localized to COPII-coated vesicles; ERP1 has a paralog, ERP6, that arose from the whole genome duplication<br>with similarity to Emp24p and Erv25p; member of the p24 family involved in ER to Golgi transport |
| LAMAP LAMAP2480_4884                                                                   | of the COMPASS (Set1C) complex, which methylates histone H3 on lysine 4 and is required in transcriptional silencing near telomeres; WD40 beta propeller superfamily member with similarity to mammalian Rbbp7                                                                                                                                                              |
| CBS2499v2 CBS2499_3617                                                                 | of the COMPASS (Set1C) complex; COMPASS methylates histone H3 on lysine 4 and is required in transcriptional silencing near telomeres; WD40 beta propeller superfamily member with similarity to mammalian Rbbp7                                                                                                                                                            |
| AWRIv2 AWRI_2692<br>LAMAP LAMAP2480_4890<br>CBS2499v2 CBS2499_3610<br>AWRIv2 AWRI_2698 | of the COMPASS (Set1C) complex; COMPASS methylates histone H3 on lysine 4 and is required in transcriptional silencing near telomeres; WD40 beta propeller superfamily member with similarity to mammalian Rbbp7<br><b>transporter ESBP6</b><br>transporter ESBP6<br>transporter ESBP6                                                                                      |
| LAMAP LAMAP2480_4898<br>CBS2499v2 CBS2499_3602                                         | U3 snoRNP protein involved in maturation of pre-18S rRNA, based on computational analysis of large-scale protein-protein interaction data<br>small nucleolar RNA-associated protein 22                                                                                                                                                                                      |
| AWRIv2 AWRI_2703<br>LAMAP LAMAP2480_4900<br>CBS2499v2 CBS2499_3600<br>AWRIv2 AWRI_2705 | of the small-subunit processome; required for nuclear export of tRNAs; may facilitate binding of Utp8p to aminoacylated tRNAs and their delivery to Los1p for export; conserved from yeast to mammals<br>factor cwf19<br>factor cwf19<br>factor cwf19                                                                                                                       |
| LAMAP LAMAP2480_4902                                                                   | component of the Translocase of the Inner Mitochondrial membrane (TIM23 complex); tethers the import motor and regulatory factors (PAM complex) to the translocation channel (Tim23p-Tim17p core complex)                                                                                                                                                                   |
| CBS2499v2 CBS2499_3598                                                                 | component of the TIM23 complex; tethers the import motor and regulatory factors (PAM complex) to the translocation channel (Tim23p-Tim17p core complex); TIM23 complex is short for the translocase of the inner mitochondrial membrane                                                                                                                                     |
| AWRIv2 AWRI_2706<br>LAMAP LAMAP2480_4904                                               | component of the TIM23 complex; tethers the import motor and regulatory factors (PAM complex) to the translocation channel (Tim23p-Tim17p core complex); TIM23 complex is short for the translocase of the inner mitochondrial membrane<br>domain                                                                                                                           |

|                        |                                                                                                                                                                                                                                                                             |
|------------------------|-----------------------------------------------------------------------------------------------------------------------------------------------------------------------------------------------------------------------------------------------------------------------------|
| CBS2499v2 CBS2499_3596 | subunit of a complex (rvs161p-rvs167p)                                                                                                                                                                                                                                      |
| AWRIv2 AWRI_2709       | subunit of a complex (rvs161p-rvs167p)                                                                                                                                                                                                                                      |
| LAMAP LAMAP2480_4909   | kinetochore protein                                                                                                                                                                                                                                                         |
| CBS2499v2 CBS2499_3591 | kinetochore protein                                                                                                                                                                                                                                                         |
| AWRIv2 AWRI_2715       | kinetochore protein                                                                                                                                                                                                                                                         |
| LAMAP LAMAP2480_4916   | protein _4183                                                                                                                                                                                                                                                               |
| CBS2499v2 CBS2499_3390 | protein _4183                                                                                                                                                                                                                                                               |
| AWRIv2 AWRI_3484       | protein _4183                                                                                                                                                                                                                                                               |
| LAMAP LAMAP2480_4917   | of RNA polymerase II transcription subunit 7                                                                                                                                                                                                                                |
| CBS2499v2 CBS2499_3388 | of RNA polymerase II transcription subunit 7                                                                                                                                                                                                                                |
| AWRIv2 AWRI_3482       | of RNA polymerase II transcription subunit 7                                                                                                                                                                                                                                |
| LAMAP LAMAP2480_4919   | conserved protein with a role in maintaining cell wall integrity; contains six TPR (tetratricopeptide repeat) domains clustered in the C-terminal region; conditional mutant is suppressed by overexpression of GFA1                                                        |
| CBS2499v2 CBS2499_3386 | conserved protein with a role in cell wall integrity; contains six TPR (tetratricopeptide repeat) domains clustered in the C-terminal region; conditional mutant is suppressed by overexpression of GFA1; protein abundance increases in response to DNA replication stress |
| AWRIv2 AWRI_3480       | conserved protein with a role in cell wall integrity; contains six TPR (tetratricopeptide repeat) domains clustered in the C-terminal region; conditional mutant is suppressed by overexpression of GFA1; protein abundance increases in response to DNA replication stress |
| LAMAP LAMAP2480_4923   | domain-containing protein YPR097W                                                                                                                                                                                                                                           |
| CBS2499v2 CBS2499_3383 | domain-containing protein YPR097W                                                                                                                                                                                                                                           |
| AWRIv2 AWRI_3477       | domain-containing protein YPR097W                                                                                                                                                                                                                                           |
| LAMAP LAMAP2480_4924   | transporter in the major facilitator superfamily (DHA1 family) of multidrug resistance transporters; mutations in membrane-spanning domains permit cation and histidinol uptake                                                                                             |
| CBS2499v2 CBS2499_3382 | transporter in the major facilitator superfamily; member of the 12-spanner drug:H(+) antiporter DHA1 family; mutations in membrane-spanning domains permit cation and histidinol uptake                                                                                     |
| AWRIv2 AWRI_3999       | transporter in the major facilitator superfamily; member of the 12-spanner drug:H(+) antiporter DHA1 family; mutations in membrane-spanning domains permit cation and histidinol uptake                                                                                     |
| LAMAP LAMAP2480_4927   | sulfonate/alpha-ketoglutarate dioxygenase, involved in sulfonate catabolism for use as a sulfur source; contains sequence that resembles a J domain (typified by the E. coli DnaJ protein); induced by sulphur starvation                                                   |
| CBS2499v2 CBS2499_3381 | sulfonate/alpha-ketoglutarate dioxygenase; involved in sulfonate catabolism for use as a sulfur source; contains sequence that resembles a J domain (typified by the E. coli DnaJ protein); induced by sulphur starvation                                                   |
| AWRIv2 AWRI_4000       | sulfonate/alpha-ketoglutarate dioxygenase; involved in sulfonate catabolism for use as a sulfur source; contains sequence that resembles a J domain (typified by the E. coli DnaJ protein); induced by sulphur starvation                                                   |
| LAMAP LAMAP2480_4929   | protein 4                                                                                                                                                                                                                                                                   |
| CBS2499v2 CBS2499_3375 | protein 4                                                                                                                                                                                                                                                                   |
| AWRIv2 AWRI_4006       | protein 4                                                                                                                                                                                                                                                                   |
| LAMAP LAMAP2480_4938   | MLP1                                                                                                                                                                                                                                                                        |
| CBS2499v2 CBS2499_3366 | MLP1 homolog                                                                                                                                                                                                                                                                |
| AWRIv2 AWRI_4018       | MLP1 homolog                                                                                                                                                                                                                                                                |

|                        |                                                                                                                                                                                                                                                                                                                                     |
|------------------------|-------------------------------------------------------------------------------------------------------------------------------------------------------------------------------------------------------------------------------------------------------------------------------------------------------------------------------------|
| LAMAP LAMAP2480_4945   | transcription factor                                                                                                                                                                                                                                                                                                                |
| CBS2499v2 CBS2499_2984 | transcription factor                                                                                                                                                                                                                                                                                                                |
| AWRIv2 AWRI_3871       | transcription factor                                                                                                                                                                                                                                                                                                                |
| LAMAP LAMAP2480_4947   | involved in synthesis of long-chain dolichols (19-22 isoprene units; as opposed to Rer2p which synthesizes shorter-chain dolichols); localizes to lipid bodies; transcription is induced during stationary phase                                                                                                                    |
| CBS2499v2 CBS2499_2982 | synthase (geranylgeranyl-diphosphate specific)                                                                                                                                                                                                                                                                                      |
| AWRIv2 AWRI_3873       |                                                                                                                                                                                                                                                                                                                                     |
| LAMAP LAMAP2480_4987   | translation initiation factor 3 subunit E                                                                                                                                                                                                                                                                                           |
| CBS2499v2 CBS2499_1845 | translation initiation factor 3 subunit E                                                                                                                                                                                                                                                                                           |
| AWRIv2 AWRI_2278       | translation initiation factor 3 subunit E                                                                                                                                                                                                                                                                                           |
| LAMAP LAMAP2480_5005   | protein _4035                                                                                                                                                                                                                                                                                                                       |
| CBS2499v2 CBS2499_3441 | protein _4035                                                                                                                                                                                                                                                                                                                       |
| AWRIv2 AWRI_3361       | protein HPODL_00351                                                                                                                                                                                                                                                                                                                 |
| LAMAP LAMAP2480_5006   | protein _4034                                                                                                                                                                                                                                                                                                                       |
| CBS2499v2 CBS2499_3442 | protein _4034                                                                                                                                                                                                                                                                                                                       |
| AWRIv2 AWRI_3360       | protein _4034                                                                                                                                                                                                                                                                                                                       |
| LAMAP LAMAP2480_5011   | transport protein yif1                                                                                                                                                                                                                                                                                                              |
| CBS2499v2 CBS2499_3446 | transport protein yif1                                                                                                                                                                                                                                                                                                              |
| AWRIv2 AWRI_3354       | transport protein yif1                                                                                                                                                                                                                                                                                                              |
| LAMAP LAMAP2480_5021   | cyclin-2                                                                                                                                                                                                                                                                                                                            |
| CBS2499v2 CBS2499_3455 | cyclin-2                                                                                                                                                                                                                                                                                                                            |
| AWRIv2 AWRI_4020       | cyclin-1                                                                                                                                                                                                                                                                                                                            |
| LAMAP LAMAP2480_5022   | <b>membrane antiporter with Ca<sup>2+</sup>/H<sup>+</sup> and K<sup>+</sup>/H<sup>+</sup> exchange activity, involved in control of cytosolic Ca<sup>2+</sup> and K<sup>+</sup> concentrations; has similarity to sodium/calcium exchangers, including the bovine Na<sup>+</sup>/Ca<sup>2+</sup>,K<sup>+</sup> antiporter</b>       |
| CBS2499v2 CBS2499_3461 | membrane antiporter with Ca <sup>2+</sup> /H <sup>+</sup> and K <sup>+</sup> /H <sup>+</sup> exchange activity; involved in control of cytosolic Ca <sup>2+</sup> and K <sup>+</sup> concentrations; has similarity to sodium/calcium exchangers, including the bovine Na <sup>+</sup> /Ca <sup>2+</sup> ,K <sup>+</sup> antiporter |
| AWRIv2 AWRI_4021       | membrane antiporter with Ca <sup>2+</sup> /H <sup>+</sup> and K <sup>+</sup> /H <sup>+</sup> exchange activity; involved in control of cytosolic Ca <sup>2+</sup> and K <sup>+</sup> concentrations; has similarity to sodium/calcium exchangers, including the bovine Na <sup>+</sup> /Ca <sup>2+</sup> ,K <sup>+</sup> antiporter |
| LAMAP LAMAP2480_5031   | specific transcription factor domain                                                                                                                                                                                                                                                                                                |
| CBS2499v2 CBS2499_3472 | resistance regulator 1                                                                                                                                                                                                                                                                                                              |
| AWRIv2 AWRI_4027       | resistance regulator 1                                                                                                                                                                                                                                                                                                              |
| LAMAP LAMAP2480_5032   | protein HPODL_02518                                                                                                                                                                                                                                                                                                                 |
| CBS2499v2 CBS2499_3473 | protein JL09_g3408                                                                                                                                                                                                                                                                                                                  |
| AWRIv2 AWRI_4028       | protein YKL077W                                                                                                                                                                                                                                                                                                                     |
| LAMAP LAMAP2480_5050   | recognition particle 72 kDa protein                                                                                                                                                                                                                                                                                                 |
| CBS2499v2 CBS2499_4555 | recognition particle subunit SRP72                                                                                                                                                                                                                                                                                                  |
| AWRIv2 AWRI_1064       | recognition particle subunit SRP72                                                                                                                                                                                                                                                                                                  |
| LAMAP LAMAP2480_5137   | kinase kinase PBS2                                                                                                                                                                                                                                                                                                                  |
| CBS2499v2 CBS2499_0448 | kinase kinase PBS2                                                                                                                                                                                                                                                                                                                  |
| AWRIv2 AWRI_3917       | kinase kinase PBS2                                                                                                                                                                                                                                                                                                                  |

|                        |                                                                                                                                                                                                                                                                                                                                                |
|------------------------|------------------------------------------------------------------------------------------------------------------------------------------------------------------------------------------------------------------------------------------------------------------------------------------------------------------------------------------------|
| LAMAP LAMAP2480_5139   | segregation protein BFR1                                                                                                                                                                                                                                                                                                                       |
| CBS2499v2 CBS2499_0450 | segregation protein BFR1                                                                                                                                                                                                                                                                                                                       |
| AWRIv2 AWRI_3915       | segregation protein BFR1                                                                                                                                                                                                                                                                                                                       |
| LAMAP LAMAP2480_5143   | YIM1-2                                                                                                                                                                                                                                                                                                                                         |
| CBS2499v2 CBS2499_0454 | YIM1-2                                                                                                                                                                                                                                                                                                                                         |
| AWRIv2 AWRI_3022       | YIM1-2                                                                                                                                                                                                                                                                                                                                         |
| LAMAP LAMAP2480_5144   | antiporter 1                                                                                                                                                                                                                                                                                                                                   |
| CBS2499v2 CBS2499_0455 | antiporter 1                                                                                                                                                                                                                                                                                                                                   |
| AWRIv2 AWRI_3023       | antiporter 1                                                                                                                                                                                                                                                                                                                                   |
| LAMAP LAMAP2480_5150   | protein C1709.03                                                                                                                                                                                                                                                                                                                               |
| CBS2499v2 CBS2499_0461 | endoplasmic reticulum membrane protein C1709.03                                                                                                                                                                                                                                                                                                |
| AWRIv2 AWRI_3026       | endoplasmic reticulum membrane protein C1709.03                                                                                                                                                                                                                                                                                                |
| LAMAP LAMAP2480_5152   | catalyzes the second step of the pentose phosphate pathway; weak multicopy suppressor of los1-1 mutation; homologous to Sol2p and Sol1p                                                                                                                                                                                                        |
| CBS2499v2 CBS2499_0462 | catalyzes the second step of the pentose phosphate pathway; weak multicopy suppressor of los1-1 mutation; homologous to Sol2p and Sol1p; SOL3 has a paralog, SOL4, that arose from the whole genome duplication                                                                                                                                |
| AWRIv2 AWRI_3027       | catalyzes the second step of the pentose phosphate pathway; weak multicopy suppressor of los1-1 mutation; homologous to Sol2p and Sol1p; SOL3 has a paralog, SOL4, that arose from the whole genome duplication                                                                                                                                |
| LAMAP LAMAP2480_5162   | osmolarity signaling protein SHO1                                                                                                                                                                                                                                                                                                              |
| CBS2499v2 CBS2499_0467 | osmolarity signaling protein SHO1                                                                                                                                                                                                                                                                                                              |
| AWRIv2 AWRI_3029       | protein _3620                                                                                                                                                                                                                                                                                                                                  |
| LAMAP LAMAP2480_5191   | protein with a possible role in sequestering heavy metals; has similarity to the type V P-type ATPase Spf1p; homolog of human ATP13A2 (PARK9), mutations in which are associated with Parkinson disease and Kufor-Rakeb syndrome                                                                                                               |
| CBS2499v2 CBS2499_3867 | protein with a possible role in sequestering heavy metals; has similarity to the type V P-type ATPase Spf1p; homolog of human ATP13A2 (PARK9), mutations in which are associated with Parkinson disease and Kufor-Rakeb syndrome                                                                                                               |
| AWRIv2 AWRI_1859       | ATPase of unknown pump specificity (type V)                                                                                                                                                                                                                                                                                                    |
| LAMAP LAMAP2480_5201   | up-regulated gene 80 protein                                                                                                                                                                                                                                                                                                                   |
| CBS2499v2 CBS2499_1229 | cyclin CLG1                                                                                                                                                                                                                                                                                                                                    |
| AWRIv2 AWRI_1702       | up-regulated gene 80 protein                                                                                                                                                                                                                                                                                                                   |
| LAMAP LAMAP2480_5205   | that converts nicotinamide to nicotinic acid as part of the NAD(+) salvage pathway, required for life span extension by calorie restriction; PNC1 expression responds to all known stimuli that extend replicative life span                                                                                                                   |
| CBS2499v2 CBS2499_1231 | that converts nicotinamide to nicotinic acid; part of the NAD(+) salvage pathway; required for life span extension by calorie restriction; PNC1 expression responds to all known stimuli that extend replicative life span; protein increases in abundance and relative distribution to cytoplasmic foci decreases upon DNA replication stress |
| AWRIv2 AWRI_1701       |                                                                                                                                                                                                                                                                                                                                                |
| LAMAP LAMAP2480_5216   | and diacylglycerol lipase                                                                                                                                                                                                                                                                                                                      |
| CBS2499v2 CBS2499_1240 | lipase YJR107W                                                                                                                                                                                                                                                                                                                                 |
| AWRIv2 AWRI_1699       | lipase YJR107W                                                                                                                                                                                                                                                                                                                                 |

|                        |                                                                                                                                                                                                                                               |
|------------------------|-----------------------------------------------------------------------------------------------------------------------------------------------------------------------------------------------------------------------------------------------|
| LAMAP LAMAP2480_5225   | subunit of the core complex of translation initiation factor 3 (eIF3), essential for translation; part of a subcomplex (Prt1p-Rpg1p-Nip1p) that stimulates binding of mRNA and tRNA(i)Met to ribosomes                                        |
| CBS2499v2 CBS2499_1250 | subunit of the eukaryotic translation initiation factor 3 (eIF3); subunit of the core complex of eIF3; essential for translation; part of a subcomplex (Prt1p-Rpg1p-Nip1p) that stimulates binding of mRNA and tRNA(i)Met to ribosomes        |
| AWRIv2 AWRI_1691       | subunit of the eukaryotic translation initiation factor 3 (eIF3); subunit of the core complex of eIF3; essential for translation; part of a subcomplex (Prt1p-Rpg1p-Nip1p) that stimulates binding of mRNA and tRNA(i)Met to ribosomes        |
| LAMAP LAMAP2480_5232   | membrane protein                                                                                                                                                                                                                              |
| CBS2499v2 CBS2499_4661 | membrane protein                                                                                                                                                                                                                              |
| AWRIv2 AWRI_1721       | membrane protein                                                                                                                                                                                                                              |
| LAMAP LAMAP2480_5239   | kinase dsk1                                                                                                                                                                                                                                   |
| CBS2499v2 CBS2499_4646 | kinase SKY1                                                                                                                                                                                                                                   |
| AWRIv2 AWRI_1731       | kinase SKY1                                                                                                                                                                                                                                   |
| LAMAP LAMAP2480_5262   | PH domain-containing protein C637.13c                                                                                                                                                                                                         |
| CBS2499v2 CBS2499_4614 | signaling protein slm1                                                                                                                                                                                                                        |
| AWRIv2 AWRI_1752       | signaling protein slm1                                                                                                                                                                                                                        |
| LAMAP LAMAP2480_5292   | complex protein 5                                                                                                                                                                                                                             |
| CBS2499v2 CBS2499_3085 | complex protein 5                                                                                                                                                                                                                             |
| AWRIv2 AWRI_1219       | of elongator which is required for modification of wobble nucleosides in trna                                                                                                                                                                 |
| LAMAP LAMAP2480_5295   | excision repair protein (rad2)                                                                                                                                                                                                                |
| CBS2499v2 CBS2499_3082 | excision repair protein (rad2)                                                                                                                                                                                                                |
| AWRIv2 AWRI_1223       | excision repair protein (rad2)                                                                                                                                                                                                                |
| LAMAP LAMAP2480_5300   | protein _1468                                                                                                                                                                                                                                 |
| CBS2499v2 CBS2499_3076 | protein _1468                                                                                                                                                                                                                                 |
| AWRIv2 AWRI_1226       | protein _1468                                                                                                                                                                                                                                 |
| LAMAP LAMAP2480_5305   | protein beta subunit, forms a dimer with Ste18p to activate the mating signaling pathway, forms a heterotrimer with Gpa1p and Ste18p to dampen signaling; may recruit Rho1p to the polarized growth site during mating; contains WD40 repeats |
| CBS2499v2 CBS2499_3072 | protein beta subunit; forms a dimer with Ste18p to activate the mating signaling pathway, forms a heterotrimer with Gpa1p and Ste18p to dampen signaling; may recruit Rho1p to the polarized growth site during mating; contains WD40 repeats |
| AWRIv2 AWRI_1229       | protein beta subunit; forms a dimer with Ste18p to activate the mating signaling pathway, forms a heterotrimer with Gpa1p and Ste18p to dampen signaling; may recruit Rho1p to the polarized growth site during mating; contains WD40 repeats |
| LAMAP LAMAP2480_5310   | protein SWI4                                                                                                                                                                                                                                  |
| CBS2499v2 CBS2499_2300 | factor MBP1                                                                                                                                                                                                                                   |
| AWRIv2 AWRI_1387       | factor MBP1                                                                                                                                                                                                                                   |
| LAMAP LAMAP2480_5311   | NSG2                                                                                                                                                                                                                                          |
| CBS2499v2 CBS2499_2301 | NSG2                                                                                                                                                                                                                                          |
| AWRIv2 AWRI_1386       | biosynthesis regulatory                                                                                                                                                                                                                       |
| LAMAP LAMAP2480_5314   | SIP5                                                                                                                                                                                                                                          |
| CBS2499v2 CBS2499_2305 | SIP5                                                                                                                                                                                                                                          |
| AWRIv2 AWRI_1384       | SIP5                                                                                                                                                                                                                                          |

|                        |                                                                                                                                                                                                                                                                                                            |
|------------------------|------------------------------------------------------------------------------------------------------------------------------------------------------------------------------------------------------------------------------------------------------------------------------------------------------------|
| LAMAP LAMAP2480_5317   | export factor MEX67                                                                                                                                                                                                                                                                                        |
| CBS2499v2 CBS2499_2307 | binding protein involved in nuclear mRNA export; component of the nuclear pore; ortholog of human TAP                                                                                                                                                                                                      |
| AWRIv2 AWRI_1382       | export factor MEX67                                                                                                                                                                                                                                                                                        |
| LAMAP LAMAP2480_5318   | small nucleolar RNA-associated protein 10                                                                                                                                                                                                                                                                  |
| CBS2499v2 CBS2499_2308 | small nucleolar RNA-associated protein 10                                                                                                                                                                                                                                                                  |
| AWRIv2 AWRI_1380       | small nucleolar RNA-associated protein 10                                                                                                                                                                                                                                                                  |
| LAMAP LAMAP2480_5342   | acid phosphohydrolase 1                                                                                                                                                                                                                                                                                    |
| CBS2499v2 CBS2499_2346 | acid phosphohydrolase 1                                                                                                                                                                                                                                                                                    |
| AWRIv2 AWRI_1350       | acid phosphohydrolase 1                                                                                                                                                                                                                                                                                    |
| LAMAP LAMAP2480_5347   | protein _2222                                                                                                                                                                                                                                                                                              |
| CBS2499v2 CBS2499_3866 | protein _2222                                                                                                                                                                                                                                                                                              |
| AWRIv2 AWRI_1858       | protein _2222                                                                                                                                                                                                                                                                                              |
| LAMAP LAMAP2480_5366   | RNA polymerase III subunit RPC9                                                                                                                                                                                                                                                                            |
| CBS2499v2 CBS2499_3846 | RNA polymerase III subunit RPC9                                                                                                                                                                                                                                                                            |
| AWRIv2 AWRI_1837       | RNA polymerase III subunit rpc9                                                                                                                                                                                                                                                                            |
| LAMAP LAMAP2480_5372   | metal ion transporter involved in manganese homeostasis; has broad specificity for di-valent and tri-valent metals; post-translationally regulated by levels of metal ions; member of the Nramp family of metal transport proteins                                                                         |
| CBS2499v2 CBS2499_3840 | divalent metal ion transporter involved in iron homeostasis; transcriptionally regulated by metal ions; member of the Nramp family of metal transport proteins; protein abundance increases in response to DNA replication stress                                                                          |
| AWRIv2 AWRI_1830       | divalent metal ion transporter involved in iron homeostasis; transcriptionally regulated by metal ions; member of the Nramp family of metal transport proteins; protein abundance increases in response to DNA replication stress                                                                          |
| LAMAP LAMAP2480_5417   | stress                                                                                                                                                                                                                                                                                                     |
| CBS2499v2 CBS2499_0491 | hydrolase YJU3                                                                                                                                                                                                                                                                                             |
| AWRIv2 AWRI_3047       | lipase                                                                                                                                                                                                                                                                                                     |
| LAMAP LAMAP2480_5423   | lipase                                                                                                                                                                                                                                                                                                     |
| CBS2499v2 CBS2499_0484 | complex subunit DAM1                                                                                                                                                                                                                                                                                       |
| AWRIv2 AWRI_3041       | complex subunit DAM1                                                                                                                                                                                                                                                                                       |
| LAMAP LAMAP2480_5432   | complex subunit DAM1                                                                                                                                                                                                                                                                                       |
| CBS2499v2 CBS2499_0474 | protein _3625                                                                                                                                                                                                                                                                                              |
| AWRIv2 AWRI_3034       | protein _3625                                                                                                                                                                                                                                                                                              |
| LAMAP LAMAP2480_5433   | protein _3625                                                                                                                                                                                                                                                                                              |
| CBS2499v2 CBS2499_0472 | protein of unknown function; the authentic, non-tagged protein is detected in highly purified mitochondria in high-throughput studies                                                                                                                                                                      |
| AWRIv2 AWRI_3033       | epimerase; catalyzes isomerization of (R)- and (S)-NADHX; homologous to AIBP in mammals and the N-terminal domain of YjeF in E.coli; enzyme is widespread in eukaryotes, prokaryotes and archaea; the authentic, non-tagged protein is detected in highly purified mitochondria in high-throughput studies |

|                        |                                                                                                                                                                                                                            |
|------------------------|----------------------------------------------------------------------------------------------------------------------------------------------------------------------------------------------------------------------------|
| LAMAP LAMAP2480_5458   | affinity sulfate permease of the SulP anion transporter family; sulfate uptake is mediated by specific sulfate transporters Sul1p and Sul2p, which control the concentration of endogenous activated sulfate intermediates |
| CBS2499v2 CBS2499_4478 | affinity sulfate permease of the SulP anion transporter family; sulfate uptake is mediated by specific sulfate transporters Sul1p and Sul2p, which control the concentration of endogenous activated sulfate intermediates |
| AWRIv2 AWRI_3138       | affinity sulfate permease of the SulP anion transporter family; sulfate uptake is mediated by specific sulfate transporters Sul1p and Sul2p, which control the concentration of endogenous activated sulfate intermediates |
| LAMAP LAMAP2480_5488   | protein _2144                                                                                                                                                                                                              |
| CBS2499v2 CBS2499_3674 | protein _2144                                                                                                                                                                                                              |
| AWRIv2 AWRI_1795       | protein _2144                                                                                                                                                                                                              |
| LAMAP LAMAP2480_5494   | RMD9-like, mitochondrial                                                                                                                                                                                                   |
| CBS2499v2 CBS2499_3670 | RMD9, mitochondrial                                                                                                                                                                                                        |
| AWRIv2 AWRI_1791       | RMD9-like, mitochondrial                                                                                                                                                                                                   |
| LAMAP LAMAP2480_5501   | small nucleolar ribonucleoprotein                                                                                                                                                                                          |
| CBS2499v2 CBS2499_3666 | small nucleolar ribonucleoprotein protein LCP5                                                                                                                                                                             |
| AWRIv2 AWRI_1787       | small nucleolar ribonucleoprotein protein LCP5                                                                                                                                                                             |
| LAMAP LAMAP2480_5539   | protein particle complex II-specific subunit 130                                                                                                                                                                           |
| CBS2499v2 CBS2499_3172 | protein particle complex II-specific subunit 130                                                                                                                                                                           |
| AWRIv2 AWRI_1888       | of 10 subunits of the transport protein particle complex of the cis-golgi                                                                                                                                                  |
| LAMAP LAMAP2480_5548   | membrane protein YJL163C                                                                                                                                                                                                   |
| CBS2499v2 CBS2499_3178 | membrane protein YJL163C                                                                                                                                                                                                   |
| AWRIv2 AWRI_1896       | membrane protein YJL163C                                                                                                                                                                                                   |
| LAMAP LAMAP2480_5557   | of glycerol defect protein 1                                                                                                                                                                                               |
| CBS2499v2 CBS2499_3190 | of glycerol defect protein 1                                                                                                                                                                                               |
| AWRIv2 AWRI_1906       | of glycerol defect protein 1                                                                                                                                                                                               |
| LAMAP LAMAP2480_5568   | factor srp1                                                                                                                                                                                                                |
| CBS2499v2 CBS2499_3199 | factor srp1                                                                                                                                                                                                                |
| AWRIv2 AWRI_1918       | factor srp1                                                                                                                                                                                                                |
| LAMAP LAMAP2480_5584   | spindle elongation protein 1                                                                                                                                                                                               |
| CBS2499v2 CBS2499_3998 | spindle elongation protein 1                                                                                                                                                                                               |
| AWRIv2 AWRI_0283       | spindle elongation protein 1                                                                                                                                                                                               |
| LAMAP LAMAP2480_5610   | structural protein involved in cell polarization, endocytosis, and other cytoskeletal functions                                                                                                                            |
| CBS2499v2 CBS2499_2007 | structural protein involved in cell polarization, endocytosis, and other cytoskeletal functions                                                                                                                            |
| AWRIv2 AWRI_0995       | structural protein involved in cell polarization, endocytosis, and other cytoskeletal functions                                                                                                                            |
| LAMAP LAMAP2480_5611   | transcription factor HCM1                                                                                                                                                                                                  |
| CBS2499v2 CBS2499_2008 | transcription factor HCM1                                                                                                                                                                                                  |
| AWRIv2 AWRI_0994       | transcription factor HCM1                                                                                                                                                                                                  |
| LAMAP LAMAP2480_5612   | E3 ubiquitin-protein ligase HUL4                                                                                                                                                                                           |
| CBS2499v2 CBS2499_2009 | E3 ubiquitin-protein ligase HUL4                                                                                                                                                                                           |
| AWRIv2 AWRI_0993       | E3 ubiquitin-protein ligase HUL4                                                                                                                                                                                           |
| LAMAP LAMAP2480_5621   | factor SKN7                                                                                                                                                                                                                |
| CBS2499v2 CBS2499_2020 | factor SKN7                                                                                                                                                                                                                |

|                        |                                                                                                                                                                                                                                                                          |
|------------------------|--------------------------------------------------------------------------------------------------------------------------------------------------------------------------------------------------------------------------------------------------------------------------|
| AWRIv2 AWRI_0985       | factor SKN7                                                                                                                                                                                                                                                              |
| LAMAP LAMAP2480_5626   | DNA polymerase alpha-associated DNA helicase A involved in lagging strand DNA synthesis; contains single-stranded DNA stimulated ATPase and dATPase activities; replication protein A stimulates helicase and ATPase activities                                          |
| CBS2499v2 CBS2499_2025 | DNA polymerase alpha-associated DNA helicase A; involved in lagging strand DNA synthesis; contains single-stranded DNA stimulated ATPase and dATPase activities; replication protein A stimulates helicase and ATPase activities                                         |
| AWRIv2 AWRI_0981       | DNA polymerase alpha-associated DNA helicase A; involved in lagging strand DNA synthesis; contains single-stranded DNA stimulated ATPase and dATPase activities; replication protein A stimulates helicase and ATPase activities                                         |
| LAMAP LAMAP2480_5639   | Fe(II) transporter of the plasma membrane                                                                                                                                                                                                                                |
| CBS2499v2 CBS2499_2036 | Fe(II) transporter of the plasma membrane                                                                                                                                                                                                                                |
| AWRIv2 AWRI_0970       | Fe(2+) transport protein                                                                                                                                                                                                                                                 |
| LAMAP LAMAP2480_5651   | wall mannoprotein PST1                                                                                                                                                                                                                                                   |
| CBS2499v2 CBS2499_0820 | wall mannoprotein PST1                                                                                                                                                                                                                                                   |
| AWRIv2 AWRI_0046       | wall mannoprotein PST1                                                                                                                                                                                                                                                   |
| LAMAP LAMAP2480_5653   | translation initiation factor 3 subunit A                                                                                                                                                                                                                                |
| CBS2499v2 CBS2499_0818 | translation initiation factor 3 subunit A                                                                                                                                                                                                                                |
| AWRIv2 AWRI_0048       | translation initiation factor 3 subunit A                                                                                                                                                                                                                                |
| LAMAP LAMAP2480_5664   | H                                                                                                                                                                                                                                                                        |
| CBS2499v2 CBS2499_0808 | H1                                                                                                                                                                                                                                                                       |
| AWRIv2 AWRI_0054       | H                                                                                                                                                                                                                                                                        |
| LAMAP LAMAP2480_5670   | protein _0066                                                                                                                                                                                                                                                            |
| CBS2499v2 CBS2499_0801 | protein _0066                                                                                                                                                                                                                                                            |
| AWRIv2 AWRI_0057       | protein _0066                                                                                                                                                                                                                                                            |
| LAMAP LAMAP2480_5705   | N-acetyltransferase C550.08                                                                                                                                                                                                                                              |
| CBS2499v2 CBS2499_3938 | N-acetyltransferase C550.08                                                                                                                                                                                                                                              |
| AWRIv2 AWRI_0227       | N-acetyltransferase C550.08                                                                                                                                                                                                                                              |
| LAMAP LAMAP2480_5720   | protein YKR096W                                                                                                                                                                                                                                                          |
| CBS2499v2 CBS2499_1513 | protein 1                                                                                                                                                                                                                                                                |
| AWRIv2 AWRI_3930       | protein 1                                                                                                                                                                                                                                                                |
| LAMAP LAMAP2480_5724   | budding pattern protein 2                                                                                                                                                                                                                                                |
| CBS2499v2 CBS2499_1517 | budding pattern protein 2                                                                                                                                                                                                                                                |
| AWRIv2 AWRI_3933       | budding pattern protein 2                                                                                                                                                                                                                                                |
| LAMAP LAMAP2480_5726   | affinity polyamine permease, preferentially uses spermidine over putrescine; expression is down-regulated by osmotic stress; plasma membrane carnitine transporter, also functions as a low-affinity amino acid permease                                                 |
| CBS2499v2 CBS2499_1519 | membrane regulator of polyamine and carnitine transport; has similarity to transporters but lacks transport activity; may act as a sensor that transduces environmental signals; has a positive or negative regulatory effect on transcription of many transporter genes |
| AWRIv2 AWRI_3935       | membrane regulator of polyamine and carnitine transport; has similarity to transporters but lacks transport activity; may act as a sensor that transduces environmental signals; has a positive or negative regulatory effect on transcription of many transporter genes |
| LAMAP LAMAP2480_5732   | protein                                                                                                                                                                                                                                                                  |

|                        |                                                                                                                                                                                                                                           |
|------------------------|-------------------------------------------------------------------------------------------------------------------------------------------------------------------------------------------------------------------------------------------|
| CBS2499v2 CBS2499_1525 | protein                                                                                                                                                                                                                                   |
| AWRIv2 AWRI_3941       | protein                                                                                                                                                                                                                                   |
| LAMAP LAMAP2480_5794   | transporter, sugar porter (SP) family                                                                                                                                                                                                     |
| CBS2499v2 CBS2499_4594 | transporter, sugar porter (SP) family                                                                                                                                                                                                     |
| AWRIv2 AWRI_1095       | transporter, sugar porter (SP) family                                                                                                                                                                                                     |
| LAMAP LAMAP2480_5803   | superoxide dismutase (SODC)                                                                                                                                                                                                               |
| CBS2499v2 CBS2499_1448 | surface superoxide dismutase [Cu-Zn] 6                                                                                                                                                                                                    |
| AWRIv2 AWRI_3777       | surface superoxide dismutase [Cu-Zn] 6                                                                                                                                                                                                    |
| LAMAP LAMAP2480_5814   | deoxyribonuclease YMR262W                                                                                                                                                                                                                 |
| CBS2499v2 CBS2499_1465 | deoxyribonuclease YMR262W                                                                                                                                                                                                                 |
| AWRIv2 AWRI_3763       | protein scn1                                                                                                                                                                                                                              |
| LAMAP LAMAP2480_5832   | amino acid decarboxylase                                                                                                                                                                                                                  |
| CBS2499v2 CBS2499_4161 | amino acid decarboxylase                                                                                                                                                                                                                  |
| AWRIv2 AWRI_4058       | amino acid decarboxylase                                                                                                                                                                                                                  |
|                        | E Vps protein of the ESCRT-III complex, required for sorting of integral membrane proteins into luminal vesicles of multivesicular bodies, and for delivery of newly synthesized vacuolar enzymes to the vacuole, involved in endocytosis |
| LAMAP LAMAP2480_5855   | E Vps protein of the ESCRT-III complex; required for sorting of integral membrane proteins into luminal vesicles of multivesicular bodies, and for delivery of newly synthesized vacuolar enzymes to the vacuole, involved in endocytosis |
|                        | E Vps protein of the ESCRT-III complex; required for sorting of integral membrane proteins into luminal vesicles of multivesicular bodies, and for delivery of newly synthesized vacuolar enzymes to the vacuole, involved in endocytosis |
| CBS2499v2 CBS2499_3280 |                                                                                                                                                                                                                                           |
|                        | E Vps protein of the ESCRT-III complex; required for sorting of integral membrane proteins into luminal vesicles of multivesicular bodies, and for delivery of newly synthesized vacuolar enzymes to the vacuole, involved in endocytosis |
| AWRIv2 AWRI_2328       | involved in endocytosis                                                                                                                                                                                                                   |
| LAMAP LAMAP2480_5856   | kinase PTK2/STK2                                                                                                                                                                                                                          |
| CBS2499v2 CBS2499_3281 | kinase PTK2/STK2                                                                                                                                                                                                                          |
| AWRIv2 AWRI_2327       | kinase PTK2/STK2                                                                                                                                                                                                                          |
| LAMAP LAMAP2480_5860   | factor PRP9                                                                                                                                                                                                                               |
| CBS2499v2 CBS2499_3285 | factor PRP9                                                                                                                                                                                                                               |
| AWRIv2 AWRI_2323       | factor PRP9                                                                                                                                                                                                                               |
|                        | protein of unknown function, likely exists as tetramer, may be regulated by the binding of small-molecule ligands (possibly sulfate ions), may have a role in yeast cell-wall biogenesis                                                  |
| LAMAP LAMAP2480_5866   | protein of unknown function; likely exists as tetramer, may be regulated by the binding of small-molecule ligands (possibly sulfate ions), may have a role in yeast cell-wall biogenesis                                                  |
| CBS2499v2 CBS2499_3291 | protein of unknown function; likely exists as tetramer, may be regulated by the binding of small-molecule ligands (possibly sulfate ions), may have a role in yeast cell-wall biogenesis                                                  |
|                        | protein of unknown function; likely exists as tetramer, may be regulated by the binding of small-molecule ligands (possibly sulfate ions), may have a role in yeast cell-wall biogenesis                                                  |
| AWRIv2 AWRI_2318       | component protein SHR3                                                                                                                                                                                                                    |
| LAMAP LAMAP2480_5873   | component protein SHR3                                                                                                                                                                                                                    |
| CBS2499v2 CBS2499_3301 | component protein SHR3                                                                                                                                                                                                                    |
| AWRIv2 AWRI_2313       | component protein SHR3                                                                                                                                                                                                                    |
| LAMAP LAMAP2480_5875   | coatomer subunit gamma                                                                                                                                                                                                                    |
| CBS2499v2 CBS2499_4774 | coatomer subunit gamma                                                                                                                                                                                                                    |
|                        | subunit of coatomer; coatomer is a heptameric protein complex that together with Arf1p forms the COPI coat; involved in ER to Golgi transport of selective cargo                                                                          |
| AWRIv2 AWRI_0764       |                                                                                                                                                                                                                                           |
| LAMAP LAMAP2480_5893   |                                                                                                                                                                                                                                           |
| CBS2499v2 CBS2499_0017 |                                                                                                                                                                                                                                           |

|                        |                                                                                                                                                                                                                                   |
|------------------------|-----------------------------------------------------------------------------------------------------------------------------------------------------------------------------------------------------------------------------------|
| AWRIv2 AWRI_0786       | import protein MOG1                                                                                                                                                                                                               |
| LAMAP LAMAP2480_5900   | import protein MOG1                                                                                                                                                                                                               |
| CBS2499v2 CBS2499_0020 | import protein MOG1                                                                                                                                                                                                               |
| AWRIv2 AWRI_0789       | oligomeric Golgi complex subunit 8                                                                                                                                                                                                |
| LAMAP LAMAP2480_5904   | oligomeric Golgi complex subunit 8                                                                                                                                                                                                |
| CBS2499v2 CBS2499_2956 | oligomeric Golgi complex subunit 8                                                                                                                                                                                                |
| AWRIv2 AWRI_3789       | protein T10 in DGCR region                                                                                                                                                                                                        |
| LAMAP LAMAP2480_5909   | protein YGR127W                                                                                                                                                                                                                   |
| CBS2499v2 CBS2499_2961 | and Golgi organization protein 2 homolog                                                                                                                                                                                          |
| AWRIv2 AWRI_3782       | O-acetyltransferase YAT2                                                                                                                                                                                                          |
| LAMAP LAMAP2480_5946   | O-acetyltransferase YAT2                                                                                                                                                                                                          |
| CBS2499v2 CBS2499_2585 | O-acetyltransferase YAT2                                                                                                                                                                                                          |
| AWRIv2 AWRI_0594       | B                                                                                                                                                                                                                                 |
| LAMAP LAMAP2480_5957   | B                                                                                                                                                                                                                                 |
| CBS2499v2 CBS2499_2188 | B                                                                                                                                                                                                                                 |
| AWRIv2 AWRI_3620       | <b>symporter</b>                                                                                                                                                                                                                  |
| LAMAP LAMAP2480_5966   | symporter                                                                                                                                                                                                                         |
| CBS2499v2 CBS2499_1594 | symporter                                                                                                                                                                                                                         |
| AWRIv2 AWRI_3613       | complex protein LRP1                                                                                                                                                                                                              |
| LAMAP LAMAP2480_5977   | complex protein LRP1                                                                                                                                                                                                              |
| CBS2499v2 CBS2499_1604 |                                                                                                                                                                                                                                   |
| AWRIv2 AWRI_3606       |                                                                                                                                                                                                                                   |
|                        | co-chaperone; binds both Hsp82p (Hsp90) and Ssa1p (Hsp70) and stimulates the ATPase activity of SSA1, ts mutants reduce Hsp82p function while over expression suppresses the phenotypes of an HSP82 ts allele and a cpr7 deletion |
| LAMAP LAMAP2480_5980   |                                                                                                                                                                                                                                   |
|                        | co-chaperone; binds both Hsp82p (Hsp90) and Ssa1p (Hsp70) and stimulates the ATPase activity of SSA1, ts mutants reduce Hsp82p function while over expression suppresses the phenotypes of an HSP82 ts allele and a cpr7 deletion |
| CBS2499v2 CBS2499_2003 |                                                                                                                                                                                                                                   |
|                        | co-chaperone; binds both Hsp82p (Hsp90) and Ssa1p (Hsp70) and stimulates the ATPase activity of SSA1, ts mutants reduce Hsp82p function while over expression suppresses the phenotypes of an HSP82 ts allele and a cpr7 deletion |
| AWRIv2 AWRI_1002       |                                                                                                                                                                                                                                   |
|                        | ATP-dependent RNA helicase, nucleolar protein required for synthesis of 60S ribosomal subunits at a late step in the pathway; sediments with 66S pre-ribosomes in sucrose gradients                                               |
| LAMAP LAMAP2480_6051   |                                                                                                                                                                                                                                   |
|                        | ATP-dependent RNA helicase; nucleolar protein required for synthesis of 60S ribosomal subunits at a late step in the pathway; sediments with 66S pre-ribosomes in sucrose gradients                                               |
| CBS2499v2 CBS2499_5026 |                                                                                                                                                                                                                                   |
|                        | ATP-dependent RNA helicase; nucleolar protein required for synthesis of 60S ribosomal subunits at a late step in the pathway; sediments with 66S pre-ribosomes in sucrose gradients                                               |
| AWRIv2 AWRI_4140       | EMP47                                                                                                                                                                                                                             |
| LAMAP LAMAP2480_6053   | EMP47                                                                                                                                                                                                                             |
| CBS2499v2 CBS2499_1588 | EMP47                                                                                                                                                                                                                             |
| AWRIv2 AWRI_2868       | repeat-containing protein PET309, mitochondrial                                                                                                                                                                                   |
| LAMAP LAMAP2480_6062   | repeat-containing protein PET309, mitochondrial                                                                                                                                                                                   |
| CBS2499v2 CBS2499_1577 | repeat-containing protein PET309, mitochondrial                                                                                                                                                                                   |
| AWRIv2 AWRI_2627       | cell-cycle arrest protein 5                                                                                                                                                                                                       |
| LAMAP LAMAP2480_6069   |                                                                                                                                                                                                                                   |

|                        |                                                                                                                                                                 |
|------------------------|-----------------------------------------------------------------------------------------------------------------------------------------------------------------|
| CBS2499v2 CBS2499_1569 | cell-cycle arrest protein 5                                                                                                                                     |
| AWRIv2 AWRI_2635       | cell-cycle arrest protein 5                                                                                                                                     |
| LAMAP LAMAP2480_6096   | switch two complex protein 1                                                                                                                                    |
| CBS2499v2 CBS2499_4791 | switch two complex protein 1                                                                                                                                    |
| AWRIv2 AWRI_1008       | switch two complex protein 1                                                                                                                                    |
| LAMAP LAMAP2480_6102   | kinase ksp1                                                                                                                                                     |
| CBS2499v2 CBS2499_2749 | serine/threonine-protein kinase FMP48                                                                                                                           |
| AWRIv2 AWRI_0364       | protein kinase 8                                                                                                                                                |
|                        | <b>sulfate permease; physically interacts with Hsp82p; green fluorescent protein (GFP)-fusion protein localizes to the ER; YPR003C is not an essential gene</b> |
| LAMAP LAMAP2480_6106   | sulfate transporter YPR003C                                                                                                                                     |
| CBS2499v2 CBS2499_2754 | sulfate transporter YPR003C                                                                                                                                     |
| AWRIv2 AWRI_0358       | utilization trans-activator                                                                                                                                     |
| LAMAP LAMAP2480_6113   | transcriptional regulatory protein C3C7.04                                                                                                                      |
| CBS2499v2 CBS2499_2766 | utilization trans-activator                                                                                                                                     |
| AWRIv2 AWRI_0347       | DNA helicase ii, 70 kDa subunit (ku70)                                                                                                                          |
| LAMAP LAMAP2480_6116   | DNA helicase ii, 70 kDa subunit (ku70)                                                                                                                          |
| CBS2499v2 CBS2499_2772 | DNA helicase ii, 70 kDa subunit (ku70)                                                                                                                          |
| AWRIv2 AWRI_0341       | chaperone D                                                                                                                                                     |
| LAMAP LAMAP2480_6121   | chaperone D                                                                                                                                                     |
| CBS2499v2 CBS2499_2776 | chaperone D                                                                                                                                                     |
| AWRIv2 AWRI_0337       | protein Mb0912                                                                                                                                                  |
| LAMAP LAMAP2480_6146   | protein Mb0912                                                                                                                                                  |
| CBS2499v2 CBS2499_4733 | protein Mb0912                                                                                                                                                  |
| AWRIv2 AWRI_2443       | chitinase 2                                                                                                                                                     |
| LAMAP LAMAP2480_6153   |                                                                                                                                                                 |
| CBS2499v2 CBS2499_4728 |                                                                                                                                                                 |
| AWRIv2 AWRI_2440       |                                                                                                                                                                 |
| LAMAP LAMAP2480_6154   |                                                                                                                                                                 |
| CBS2499v2 CBS2499_4727 |                                                                                                                                                                 |
| AWRIv2 AWRI_2439       |                                                                                                                                                                 |
| LAMAP LAMAP2480_6173   |                                                                                                                                                                 |
| CBS2499v2 CBS2499_3153 |                                                                                                                                                                 |
| AWRIv2 AWRI_3555       |                                                                                                                                                                 |
|                        |                                                                                                                                                                 |
| LAMAP LAMAP2480_6176   |                                                                                                                                                                 |
|                        |                                                                                                                                                                 |
| CBS2499v2 CBS2499_3150 |                                                                                                                                                                 |
|                        |                                                                                                                                                                 |
| AWRIv2 AWRI_3548       |                                                                                                                                                                 |
| LAMAP LAMAP2480_6178   |                                                                                                                                                                 |
| CBS2499v2 CBS2499_3143 |                                                                                                                                                                 |

|                        |                                                                                                                                                                                                                                        |
|------------------------|----------------------------------------------------------------------------------------------------------------------------------------------------------------------------------------------------------------------------------------|
| AWRIv2 AWRI_3543       | efflux                                                                                                                                                                                                                                 |
| LAMAP LAMAP2480_6212   | protein sorting-associated protein 41                                                                                                                                                                                                  |
| CBS2499v2 CBS2499_0962 | protein sorting-associated protein 41                                                                                                                                                                                                  |
| AWRIv2 AWRI_0734       | protein sorting-associated protein 41                                                                                                                                                                                                  |
| LAMAP LAMAP2480_6215   | protein                                                                                                                                                                                                                                |
| CBS2499v2 CBS2499_0965 | protein                                                                                                                                                                                                                                |
| AWRIv2 AWRI_0731       | protein                                                                                                                                                                                                                                |
| LAMAP LAMAP2480_6219   | protein 1                                                                                                                                                                                                                              |
| CBS2499v2 CBS2499_0969 | protein 1                                                                                                                                                                                                                              |
| AWRIv2 AWRI_0725       | protein 1                                                                                                                                                                                                                              |
| LAMAP LAMAP2480_6252   | protein _2766                                                                                                                                                                                                                          |
| CBS2499v2 CBS2499_3303 | protein _2766                                                                                                                                                                                                                          |
| AWRIv2 AWRI_2311       | protein _2766                                                                                                                                                                                                                          |
| LAMAP LAMAP2480_6303   | b5                                                                                                                                                                                                                                     |
| CBS2499v2 CBS2499_1221 | b5                                                                                                                                                                                                                                     |
| AWRIv2 AWRI_1708       | b5                                                                                                                                                                                                                                     |
|                        | base subunit of the 19S regulatory particle (RP) of the 26S proteasome; N-terminus plays a role in maintaining the structural integrity of the RP; binds selectively to polyubiquitin chains; homolog of the mammalian S5a protein     |
| LAMAP LAMAP2480_6307   | base subunit of the 19S RP of the 26S proteasome; N-terminus plays a role in maintaining the structural integrity of the regulatory particle (RP); binds selectively to polyubiquitin chains; homolog of the mammalian S5a protein     |
|                        | proteasome regulatory subunit rpn10                                                                                                                                                                                                    |
| CBS2499v2 CBS2499_1218 | LAS1                                                                                                                                                                                                                                   |
| AWRIv2 AWRI_2547       | LAS1                                                                                                                                                                                                                                   |
| LAMAP LAMAP2480_6317   | LAS1                                                                                                                                                                                                                                   |
| CBS2499v2 CBS2499_1209 | protein YDL063C                                                                                                                                                                                                                        |
| AWRIv2 AWRI_2551       | import protein 1                                                                                                                                                                                                                       |
| LAMAP LAMAP2480_6321   | import protein 1                                                                                                                                                                                                                       |
| CBS2499v2 CBS2499_1206 | protein of unknown function, transcription is activated by paralogous transcription factors Yrm1p and Yrr1p and genes involved in pleiotropic drug resistance (PDR); expression is induced in cells treated with the mycotoxin patulin |
| AWRIv2 AWRI_2553       | protein of unknown function; transcription is activated by paralogous transcription factors Yrm1p and Yrr1p and genes involved in pleiotropic drug resistance (PDR); expression is induced in cells treated with the mycotoxin patulin |
|                        | protein of unknown function; transcription is activated by paralogous transcription factors Yrm1p and Yrr1p and genes involved in pleiotropic drug resistance (PDR); expression is induced in cells treated with the mycotoxin patulin |
| LAMAP LAMAP2480_6351   | protein of unknown function; transcription is activated by paralogous transcription factors Yrm1p and Yrr1p and genes involved in pleiotropic drug resistance (PDR); expression is induced in cells treated with the mycotoxin patulin |
|                        | protein of unknown function; transcription is activated by paralogous transcription factors Yrm1p and Yrr1p and genes involved in pleiotropic drug resistance (PDR); expression is induced in cells treated with the mycotoxin patulin |
| CBS2499v2 CBS2499_2357 | protein of unknown function; transcription is activated by paralogous transcription factors Yrm1p and Yrr1p and genes involved in pleiotropic drug resistance (PDR); expression is induced in cells treated with the mycotoxin patulin |
|                        | protein of unknown function; transcription is activated by paralogous transcription factors Yrm1p and Yrr1p and genes involved in pleiotropic drug resistance (PDR); expression is induced in cells treated with the mycotoxin patulin |
| AWRIv2 AWRI_1342       | initiation factor IIE subunit beta                                                                                                                                                                                                     |
| LAMAP LAMAP2480_6354   | initiation factor IIE subunit beta                                                                                                                                                                                                     |
| CBS2499v2 CBS2499_2351 | initiation factor IIE subunit beta                                                                                                                                                                                                     |
| AWRIv2 AWRI_1344       | RNA polymerase I subunit RPA34                                                                                                                                                                                                         |
| LAMAP LAMAP2480_6355   | RNA polymerase I subunit RPA34                                                                                                                                                                                                         |
| CBS2499v2 CBS2499_2350 | RNA polymerase I subunit RPA34                                                                                                                                                                                                         |
| AWRIv2 AWRI_1345       | RNA polymerase I subunit RPA34                                                                                                                                                                                                         |

|                        |                                                                                                                                                                                                                                                                                  |
|------------------------|----------------------------------------------------------------------------------------------------------------------------------------------------------------------------------------------------------------------------------------------------------------------------------|
| LAMAP LAMAP2480_6362   | ribosomal protein mitochondrial                                                                                                                                                                                                                                                  |
| CBS2499v2 CBS2499_0956 | ribosomal protein mitochondrial                                                                                                                                                                                                                                                  |
| AWRIv2 AWRI_0740       | ribosomal protein mitochondrial                                                                                                                                                                                                                                                  |
| LAMAP LAMAP2480_6367   | domain-containing protein 2                                                                                                                                                                                                                                                      |
| CBS2499v2 CBS2499_0951 | domain-containing protein 2                                                                                                                                                                                                                                                      |
| AWRIv2 AWRI_0745       | domain                                                                                                                                                                                                                                                                           |
| LAMAP LAMAP2480_6368   | protein 3                                                                                                                                                                                                                                                                        |
| CBS2499v2 CBS2499_0950 | protein 3                                                                                                                                                                                                                                                                        |
| AWRIv2 AWRI_0746       | protein 3                                                                                                                                                                                                                                                                        |
| LAMAP LAMAP2480_6369   | factor, CC1-like family                                                                                                                                                                                                                                                          |
| CBS2499v2 CBS2499_0948 | factor, CC1-like family                                                                                                                                                                                                                                                          |
| AWRIv2 AWRI_0748       | factor, CC1-like family                                                                                                                                                                                                                                                          |
| LAMAP LAMAP2480_6371   | t-SNARE syntaxin required for vesicular transport between the ER and the Golgi complex; binds at least 9 SNARE proteins                                                                                                                                                          |
| CBS2499v2 CBS2499_0946 | t-SNARE syntaxin; required for vesicular transport between the ER and the Golgi complex; binds at least 9 SNARE proteins                                                                                                                                                         |
| AWRIv2 AWRI_0750       | t-SNARE syntaxin; required for vesicular transport between the ER and the Golgi complex; binds at least 9 SNARE proteins                                                                                                                                                         |
| LAMAP LAMAP2480_6373   | of the TOM (translocase of outer membrane) complex responsible for recognition and initial import steps for all mitochondrially directed proteins; acts as a receptor for incoming precursor proteins                                                                            |
| CBS2499v2 CBS2499_0944 | of the TOM (translocase of outer membrane) complex; involved in the recognition and initial import steps for all mitochondrially directed proteins; acts as a receptor for incoming precursor proteins; TOM70 has a paralog, TOM71, that arose from the whole genome duplication |
| AWRIv2 AWRI_0752       | of the TOM (translocase of outer membrane) complex; involved in the recognition and initial import steps for all mitochondrially directed proteins; acts as a receptor for incoming precursor proteins; TOM70 has a paralog, TOM71, that arose from the whole genome duplication |
| LAMAP LAMAP2480_6374   | cardiolipin-specific phospholipase; functions upstream of Taz1p to generate monolyso-cardiolipin; transcription increases upon genotoxic stress; involved in restricting Ty1 transposition; has homology to mammalian CGI-58                                                     |
| CBS2499v2 CBS2499_0943 | cardiolipin-specific phospholipase; functions upstream of Taz1p to generate monolyso-cardiolipin; transcription increases upon genotoxic stress; involved in restricting Ty1 transposition; has homology to mammalian CGI-58                                                     |
| AWRIv2 AWRI_2489       | cardiolipin-specific deacylase, mitochondrial                                                                                                                                                                                                                                    |
| LAMAP LAMAP2480_6378   | protein 9                                                                                                                                                                                                                                                                        |
| CBS2499v2 CBS2499_0939 | protein 9                                                                                                                                                                                                                                                                        |
| AWRIv2 AWRI_2491       | protein 9                                                                                                                                                                                                                                                                        |
| LAMAP LAMAP2480_6414   | factor STP2                                                                                                                                                                                                                                                                      |
| CBS2499v2 CBS2499_3495 | factor STP2                                                                                                                                                                                                                                                                      |
| AWRIv2 AWRI_3530       | factor STP2                                                                                                                                                                                                                                                                      |
| LAMAP LAMAP2480_6444   | family                                                                                                                                                                                                                                                                           |
| CBS2499v2 CBS2499_4890 | family                                                                                                                                                                                                                                                                           |
| AWRIv2 AWRI_3966       | family                                                                                                                                                                                                                                                                           |
| LAMAP LAMAP2480_6445   | carboxypeptidase yscS; expression is induced under low-nitrogen conditions                                                                                                                                                                                                       |
| CBS2499v2 CBS2499_4889 | carboxypeptidase S; expression is induced under low-nitrogen conditions                                                                                                                                                                                                          |

AWRIv2|AWRI\_3964  
LAMAP|LAMAP2480\_6448  
CBS2499v2|CBS2499\_4886  
AWRIv2|AWRI\_3961  
LAMAP|LAMAP2480\_6452  
CBS2499v2|CBS2499\_4882  
AWRIv2|AWRI\_4132  
LAMAP|LAMAP2480\_6462  
CBS2499v2|CBS2499\_2745  
AWRIv2|AWRI\_0368  
LAMAP|LAMAP2480\_6471  
CBS2499v2|CBS2499\_2734

AWRIv2|AWRI\_0380  
LAMAP|LAMAP2480\_6480  
CBS2499v2|CBS2499\_2722  
AWRIv2|AWRI\_0393  
LAMAP|LAMAP2480\_6485  
CBS2499v2|CBS2499\_4714  
AWRIv2|AWRI\_2423  
LAMAP|LAMAP2480\_6490  
CBS2499v2|CBS2499\_4709  
AWRIv2|AWRI\_2418  
LAMAP|LAMAP2480\_6499  
CBS2499v2|CBS2499\_1923  
AWRIv2|AWRI\_1641  
LAMAP|LAMAP2480\_6500  
CBS2499v2|CBS2499\_1922  
AWRIv2|AWRI\_1642  
LAMAP|LAMAP2480\_6502  
CBS2499v2|CBS2499\_1919  
AWRIv2|AWRI\_1645  
LAMAP|LAMAP2480\_6503  
CBS2499v2|CBS2499\_1918  
AWRIv2|AWRI\_1646  
LAMAP|LAMAP2480\_6504  
CBS2499v2|CBS2499\_1917  
AWRIv2|AWRI\_1647

LAMAP|LAMAP2480\_6505

CBS2499v2|CBS2499\_1916

carboxypeptidase S; expression is induced under low-nitrogen conditions

**transporter C757.13**

transporter C757.13

transporter C757.13

protein HPODL\_05036

protein HPODL\_05036

transcription factor

protein YOR296W

protein YOR296W

protein YOR296W

aminopeptidase, overproduction stimulates glycogen accumulation

N

amino peptidase; overproduction stimulates glycogen accumulation; AAP1 has a paralog, APE2, that arose from the whole genome duplication

biogenesis protein ALB1

biogenesis protein ALB1

biogenesis protein ALB1

protein HPODL\_01186

protein HPODL\_01186

n-methyltransferase

5'-phosphate oxidase C1952.08c homolog

5'-phosphate oxidase YLR456W homolog

5'-phosphate oxidase C1952.08c homolog

protein C922.05c

protein C922.05c

protein C922.05c

kinase 1

kinase 1

transcriptional regulatory protein YJL206C

transcriptional regulatory protein YJL206C

transcriptional regulatory protein YJL206C

transcriptional regulatory protein C417.09c

transcriptional regulatory protein C417.09c

transcriptional regulatory protein C417.09c

**nucleoside transporter family**

nucleoside transporter family

nucleoside transporter family

**permease, transports maltose, maltotriose, alpha-methylglucoside, and turanose; identical to Mph3p; encoded in a subtelomeric position in a region likely to have undergone duplication**

permease; transports maltose, maltotriose, alpha-methylglucoside, and turanose; identical to Mph3p; encoded in a subtelomeric position in a region likely to have undergone duplication

|                        |                                                                                                                                                                                                                                                                                                                                                                    |
|------------------------|--------------------------------------------------------------------------------------------------------------------------------------------------------------------------------------------------------------------------------------------------------------------------------------------------------------------------------------------------------------------|
| AWRIv2 AWRI_1648       | permease; transports maltose, maltotriose, alpha-methylglucoside, and turanose; identical to Mph3p; encoded in a subtelomeric position in a region likely to have undergone duplication                                                                                                                                                                            |
| LAMAP LAMAP2480_6506   | invertase                                                                                                                                                                                                                                                                                                                                                          |
| CBS2499v2 CBS2499_1915 | invertase                                                                                                                                                                                                                                                                                                                                                          |
| AWRIv2 AWRI_1649       | invertase                                                                                                                                                                                                                                                                                                                                                          |
| LAMAP LAMAP2480_6507   | <b>transporter, sugar porter (SP) family</b>                                                                                                                                                                                                                                                                                                                       |
| CBS2499v2 CBS2499_1914 | transporter, sugar porter (SP) family                                                                                                                                                                                                                                                                                                                              |
| AWRIv2 AWRI_1650       | transporter, sugar porter (SP) family                                                                                                                                                                                                                                                                                                                              |
| LAMAP LAMAP2480_6528   | protein HPODL_03877                                                                                                                                                                                                                                                                                                                                                |
| CBS2499v2 CBS2499_3562 | protein HPODL_03877                                                                                                                                                                                                                                                                                                                                                |
| AWRIv2 AWRI_3906       | protein HPODL_03877                                                                                                                                                                                                                                                                                                                                                |
| LAMAP LAMAP2480_6530   | domain containing protein                                                                                                                                                                                                                                                                                                                                          |
| CBS2499v2 CBS2499_3564 | domain containing protein                                                                                                                                                                                                                                                                                                                                          |
| AWRIv2 AWRI_3907       | domain containing protein                                                                                                                                                                                                                                                                                                                                          |
| LAMAP LAMAP2480_6537   | regulatory protein ASH1                                                                                                                                                                                                                                                                                                                                            |
| CBS2499v2 CBS2499_0901 | regulatory protein ASH1                                                                                                                                                                                                                                                                                                                                            |
| AWRIv2 AWRI_2520       | regulatory protein ASH1                                                                                                                                                                                                                                                                                                                                            |
| LAMAP LAMAP2480_6538   | protein product                                                                                                                                                                                                                                                                                                                                                    |
| CBS2499v2 CBS2499_0898 | ECM7                                                                                                                                                                                                                                                                                                                                                               |
| AWRIv2 AWRI_2522       | ECM7                                                                                                                                                                                                                                                                                                                                                               |
| LAMAP LAMAP2480_6543   | protein of unknown function; green fluorescent protein (GFP)-fusion protein localizes to the cytoplasm and nucleus; periodically expressed during the metabolic cycle; weak similarity to bacterial cation transport protein                                                                                                                                       |
| CBS2499v2 CBS2499_0887 | cyclotransferase; cleaves the gamma-glutamyl bond of glutathione to yield 5-oxoproline and a Cys-Gly dipeptide; similar to mammalian pro-apoptotic protein ChaC1; expression of mouse ChaC1 in yeast increases apoptosis; green fluorescent protein (GFP)-fusion protein localizes to the cytoplasm and nucleus; periodically expressed during the metabolic cycle |
| AWRIv2 AWRI_2533       | cyclotransferase; cleaves the gamma-glutamyl bond of glutathione to yield 5-oxoproline and a Cys-Gly dipeptide; similar to mammalian pro-apoptotic protein ChaC1; expression of mouse ChaC1 in yeast increases apoptosis; green fluorescent protein (GFP)-fusion protein localizes to the cytoplasm and nucleus; periodically expressed during the metabolic cycle |
| LAMAP LAMAP2480_6546   | repair protein rad4                                                                                                                                                                                                                                                                                                                                                |
| CBS2499v2 CBS2499_0884 | repair protein rad4                                                                                                                                                                                                                                                                                                                                                |
| AWRIv2 AWRI_2535       | repair protein RAD4                                                                                                                                                                                                                                                                                                                                                |
| LAMAP LAMAP2480_6563   | <b>malate dehydrogenase, catalyzes interconversion of malate and oxaloacetate; involved in the tricarboxylic acid (TCA) cycle; phosphorylated</b>                                                                                                                                                                                                                  |
| CBS2499v2 CBS2499_4506 | malate dehydrogenase; catalyzes interconversion of malate and oxaloacetate; involved in the tricarboxylic acid (TCA) cycle; phosphorylated                                                                                                                                                                                                                         |
| AWRIv2 AWRI_1028       | malate dehydrogenase; catalyzes interconversion of malate and oxaloacetate; involved in the tricarboxylic acid (TCA) cycle; phosphorylated                                                                                                                                                                                                                         |
| LAMAP LAMAP2480_6588   | transport protein SEC31                                                                                                                                                                                                                                                                                                                                            |
| CBS2499v2 CBS2499_4090 | transport protein SEC31                                                                                                                                                                                                                                                                                                                                            |
| AWRIv2 AWRI_2734       | transport protein SEC31                                                                                                                                                                                                                                                                                                                                            |
| LAMAP LAMAP2480_6595   | protein                                                                                                                                                                                                                                                                                                                                                            |

|                        |                                                                                                                                                                                   |
|------------------------|-----------------------------------------------------------------------------------------------------------------------------------------------------------------------------------|
| CBS2499v2 CBS2499_4082 | protein                                                                                                                                                                           |
| AWRIv2 AWRI_2729       | protein                                                                                                                                                                           |
| LAMAP LAMAP2480_6606   | ATPase                                                                                                                                                                            |
| CBS2499v2 CBS2499_3247 | 2-reductase                                                                                                                                                                       |
| AWRIv2 AWRI_2360       | 2-reductase                                                                                                                                                                       |
| LAMAP LAMAP2480_6607   | CASP                                                                                                                                                                              |
| CBS2499v2 CBS2499_3248 | CASP                                                                                                                                                                              |
| AWRIv2 AWRI_2359       | CASP                                                                                                                                                                              |
| LAMAP LAMAP2480_6613   | binding domain of Hap4 for binding to Hap2/3/5                                                                                                                                    |
| CBS2499v2 CBS2499_3255 | binding domain of Hap4 for binding to Hap2/3/5                                                                                                                                    |
| AWRIv2 AWRI_2356       | binding domain of Hap4 for binding to Hap2/3/5                                                                                                                                    |
| LAMAP LAMAP2480_6622   | class I and II                                                                                                                                                                    |
| CBS2499v2 CBS2499_3264 | protein _2807                                                                                                                                                                     |
| AWRIv2 AWRI_2345       | protein _2807                                                                                                                                                                     |
| LAMAP LAMAP2480_6636   | protein YMR074C                                                                                                                                                                   |
| CBS2499v2 CBS2499_1865 | protein MK1619                                                                                                                                                                    |
| AWRIv2 AWRI_2290       | protein YMR074C                                                                                                                                                                   |
| LAMAP LAMAP2480_6660   | initiation factor (eIF) 2A; associates specifically with both 40S subunits and 80 S ribosomes, and interacts genetically with both eIF5b and eIF4E; homologous to mammalian eIF2A |
| CBS2499v2 CBS2499_2230 | initiation factor (eIF) 2A; associates specifically with both 40S subunits and 80 S ribosomes, and interacts genetically with both eIF5b and eIF4E; homologous to mammalian eIF2A |
| AWRIv2 AWRI_2832       | translation initiation factor 2A                                                                                                                                                  |
| LAMAP LAMAP2480_6663   | domain-containing protein                                                                                                                                                         |
| CBS2499v2 CBS2499_2227 | domain-containing protein                                                                                                                                                         |
| AWRIv2 AWRI_2830       | domain-containing protein                                                                                                                                                         |
| LAMAP LAMAP2480_6684   | protein _0018                                                                                                                                                                     |
| CBS2499v2 CBS2499_0852 | protein _0018                                                                                                                                                                     |
| AWRIv2 AWRI_0015       | protein _0018                                                                                                                                                                     |
| LAMAP LAMAP2480_6688   | division cycle protein 27 homolog B                                                                                                                                               |
| CBS2499v2 CBS2499_0849 |                                                                                                                                                                                   |
| AWRIv2 AWRI_0018       | bimA                                                                                                                                                                              |
| LAMAP LAMAP2480_6691   | <b>transport protein SEC20</b>                                                                                                                                                    |
| CBS2499v2 CBS2499_0846 | transport protein SEC20                                                                                                                                                           |
| AWRIv2 AWRI_0020       | transport protein SEC20                                                                                                                                                           |
| LAMAP LAMAP2480_6693   | acetyltransferase type B subunit 2                                                                                                                                                |
| CBS2499v2 CBS2499_0844 | acetyltransferase type B subunit 2                                                                                                                                                |
| AWRIv2 AWRI_0022       | acetyltransferase type B subunit 2                                                                                                                                                |
| LAMAP LAMAP2480_6696   | protein YLR352W                                                                                                                                                                   |
| CBS2499v2 CBS2499_0841 | protein YLR352W                                                                                                                                                                   |
| AWRIv2 AWRI_0025       | protein YLR352W                                                                                                                                                                   |
| LAMAP LAMAP2480_6701   | protein _4892                                                                                                                                                                     |
| CBS2499v2 CBS2499_1800 | protein _4892                                                                                                                                                                     |
| AWRIv2 AWRI_4121       | protein _4892                                                                                                                                                                     |
| LAMAP LAMAP2480_6704   | complex subunit 5                                                                                                                                                                 |
| CBS2499v2 CBS2499_1804 | complex subunit 5                                                                                                                                                                 |

|                        |                                                                                                                                                                                                                                 |
|------------------------|---------------------------------------------------------------------------------------------------------------------------------------------------------------------------------------------------------------------------------|
| AWRIv2 AWRI_4116       | complex subunit 5                                                                                                                                                                                                               |
| LAMAP LAMAP2480_6717   | PUN1                                                                                                                                                                                                                            |
| CBS2499v2 CBS2499_1824 | PUN1                                                                                                                                                                                                                            |
| AWRIv2 AWRI_2264       | PUN1                                                                                                                                                                                                                            |
| LAMAP LAMAP2480_6718   | mitochondrial outer membrane protein YPR098C                                                                                                                                                                                    |
| CBS2499v2 CBS2499_1825 | mitochondrial outer membrane protein YPR098C                                                                                                                                                                                    |
| AWRIv2 AWRI_2265       | mitochondrial outer membrane protein YPR098C                                                                                                                                                                                    |
|                        | (R,R)-butanediol dehydrogenase, catalyzes oxidation of (R,R)-2,3-butanediol to (3R)-acetoin, oxidation of meso-butanediol to (3S)-acetoin, and reduction of acetoin; enhances use of 2,3-butanediol as an aerobic carbon source |
| LAMAP LAMAP2480_6719   | (R,R)-butanediol dehydrogenase; catalyzes oxidation of (R,R)-2,3-butanediol to (3R)-acetoin, oxidation of meso-butanediol to (3S)-acetoin, and reduction of acetoin; enhances use of 2,3-butanediol as an aerobic carbon source |
| CBS2499v2 CBS2499_1830 | (R,R)-butanediol dehydrogenase; catalyzes oxidation of (R,R)-2,3-butanediol to (3R)-acetoin, oxidation of meso-butanediol to (3S)-acetoin, and reduction of acetoin; enhances use of 2,3-butanediol as an aerobic carbon source |
| AWRIv2 AWRI_2268       | acid phosphatase                                                                                                                                                                                                                |
| LAMAP LAMAP2480_6728   | acid phosphatase                                                                                                                                                                                                                |
| CBS2499v2 CBS2499_4460 | acid phosphatase                                                                                                                                                                                                                |
| AWRIv2 AWRI_3150       | acid phosphatase                                                                                                                                                                                                                |
| LAMAP LAMAP2480_6732   | ATP-dependent RNA helicase of the DEAD-box family involved in ribosomal biogenesis; essential for growth under anaerobic conditions                                                                                             |
| CBS2499v2 CBS2499_4465 | ATP-dependent RNA helicase of the DEAD-box family; involved in ribosomal biogenesis; required at post-transcriptional step for efficient retrotransposition; essential for growth under anaerobic conditions                    |
| AWRIv2 AWRI_3149       | ATP-dependent RNA helicase of the DEAD-box family; involved in ribosomal biogenesis; required at post-transcriptional step for efficient retrotransposition; essential for growth under anaerobic conditions                    |
| LAMAP LAMAP2480_6753   | assembly factor, functions with other V-ATPase assembly factors in the ER to efficiently assemble the V-ATPase membrane sector (V0)                                                                                             |
| CBS2499v2 CBS2499_3729 | assembly factor; functions with other V-ATPase assembly factors in the ER to efficiently assemble the V-ATPase membrane sector (V0); protein abundance increases in response to DNA replication stress                          |
| AWRIv2 AWRI_1160       | assembly factor; functions with other V-ATPase assembly factors in the ER to efficiently assemble the V-ATPase membrane sector (V0); protein abundance increases in response to DNA replication stress                          |
| LAMAP LAMAP2480_6782   | polyadenylated RNA-binding protein NAB2                                                                                                                                                                                         |
| CBS2499v2 CBS2499_2159 | polyadenylated RNA-binding protein NAB2                                                                                                                                                                                         |
| AWRIv2 AWRI_2890       | polyadenylated RNA-binding protein NAB2                                                                                                                                                                                         |
| LAMAP LAMAP2480_6792   | ALG9                                                                                                                                                                                                                            |
| CBS2499v2 CBS2499_2139 | alg9                                                                                                                                                                                                                            |
| AWRIv2 AWRI_2906       | ALG9                                                                                                                                                                                                                            |
| LAMAP LAMAP2480_6797   | serine/threonine-protein kinase HAL5-like                                                                                                                                                                                       |
| CBS2499v2 CBS2499_2275 | kinase hal4                                                                                                                                                                                                                     |
| AWRIv2 AWRI_3829       | serine/threonine-protein kinase HAL5-like                                                                                                                                                                                       |

|                        |                                                                                                                                                                                                                                                |
|------------------------|------------------------------------------------------------------------------------------------------------------------------------------------------------------------------------------------------------------------------------------------|
| LAMAP LAMAP2480_6800   | protein _4573                                                                                                                                                                                                                                  |
| CBS2499v2 CBS2499_2278 | protein _4573                                                                                                                                                                                                                                  |
| AWRIv2 AWRI_3833       | protein _4573                                                                                                                                                                                                                                  |
| LAMAP LAMAP2480_6813   | BOB1                                                                                                                                                                                                                                           |
| CBS2499v2 CBS2499_2296 | BOB1                                                                                                                                                                                                                                           |
| AWRIv2 AWRI_3850       | BOB1                                                                                                                                                                                                                                           |
|                        | <b>membrane riboflavin transporter; facilitates the uptake of vitamin B2; required for FAD-dependent processes; sequence similarity to mammalian monocarboxylate permeases, however mutants are not deficient in monocarboxylate transport</b> |
| LAMAP LAMAP2480_6814   | membrane riboflavin transporter; facilitates the uptake of vitamin B2; required for FAD-dependent processes; sequence similarity to mammalian monocarboxylate permeases, however mutants are not deficient in monocarboxylate transport        |
| CBS2499v2 CBS2499_4208 | transporter MCH4                                                                                                                                                                                                                               |
| AWRIv2 AWRI_3063       | subunit of Sec63 complex (Sec63p, Sec62p, Sec66p and Sec72p); with Sec61 complex, Kar2p/BiP and Lhs1p forms a channel competent for SRP-dependent and post-translational SRP-independent protein targeting and import into the ER              |
| LAMAP LAMAP2480_6816   | subunit of Sec63 complex; with Sec61 complex, Kar2p/BiP and Lhs1p forms a channel competent for SRP-dependent and post-translational SRP-independent protein targeting and import into the ER; other members are Sec63p, Sec62p, and Sec72p    |
| CBS2499v2 CBS2499_4210 | subunit of Sec63 complex; with Sec61 complex, Kar2p/BiP and Lhs1p forms a channel competent for SRP-dependent and post-translational SRP-independent protein targeting and import into the ER; other members are Sec63p, Sec62p, and Sec72p    |
| AWRIv2 AWRI_3060       | transcription complex subunit 3                                                                                                                                                                                                                |
| LAMAP LAMAP2480_6824   | negative regulator of transcription subunit 3                                                                                                                                                                                                  |
| CBS2499v2 CBS2499_4217 | negative regulator of transcription subunit 3                                                                                                                                                                                                  |
| AWRIv2 AWRI_3054       |                                                                                                                                                                                                                                                |
| LAMAP LAMAP2480_6826   | of TFIIH and nucleotide excision repair factor 3 complexes, involved in transcription initiation, required for nucleotide excision repair; ring finger protein similar to mammalian CAK and TFIIH subunit                                      |
| CBS2499v2 CBS2499_4218 | of TFIIH and nucleotide excision repair factor 3 complexes; involved in transcription initiation, required for nucleotide excision repair; ring finger protein similar to mammalian CAK and TFIIH subunit                                      |
| AWRIv2 AWRI_3053       | of TFIIH and nucleotide excision repair factor 3 complexes; involved in transcription initiation, required for nucleotide excision repair; ring finger protein similar to mammalian CAK and TFIIH subunit                                      |
| LAMAP LAMAP2480_6842   | complex subunit mu                                                                                                                                                                                                                             |
| CBS2499v2 CBS2499_3814 | complex subunit mu                                                                                                                                                                                                                             |
| AWRIv2 AWRI_4087       | complex subunit mu                                                                                                                                                                                                                             |
| LAMAP LAMAP2480_6849   | synthetase, synthesizes PRPP, which is required for nucleotide, histidine, and tryptophan biosynthesis; one of five related enzymes, which are active as heteromultimeric complexes                                                            |
| CBS2499v2 CBS2499_3809 | synthetase; synthesizes PRPP, which is required for nucleotide, histidine, and tryptophan biosynthesis; one of five related enzymes, which are active as heteromultimeric complexes; forms cytoplasmic foci upon DNA replication stress        |

|                        |                                                                                                                                                                                                                                         |
|------------------------|-----------------------------------------------------------------------------------------------------------------------------------------------------------------------------------------------------------------------------------------|
| AWRIv2 AWRI_4091       | synthetase; synthesizes PRPP, which is required for nucleotide, histidine, and tryptophan biosynthesis; one of five related enzymes, which are active as heteromultimeric complexes; forms cytoplasmic foci upon DNA replication stress |
| LAMAP LAMAP2480_6855   | protein _2952                                                                                                                                                                                                                           |
| CBS2499v2 CBS2499_1162 | protein _2952                                                                                                                                                                                                                           |
| AWRIv2 AWRI_2451       | protein _2952                                                                                                                                                                                                                           |
|                        | subunit of the Hat1p-Hat2p histone acetyltransferase complex that uses the cofactor acetyl coenzyme A, to acetylate free nuclear and cytoplasmic histone H4; involved in telomeric silencing and DNA double-strand break repair         |
| LAMAP LAMAP2480_6879   | subunit of the Hat1p-Hat2p histone acetyltransferase complex; uses the cofactor acetyl coenzyme A to acetylate free nuclear and cytoplasmic histone H4; involved in telomeric silencing and DNA double-strand break repair              |
| CBS2499v2 CBS2499_3675 | subunit of the Hat1p-Hat2p histone acetyltransferase complex; uses the cofactor acetyl coenzyme A to acetylate free nuclear and cytoplasmic histone H4; involved in telomeric silencing and DNA double-strand break repair              |
|                        | subunit of the Hat1p-Hat2p histone acetyltransferase complex; uses the cofactor acetyl coenzyme A to acetylate free nuclear and cytoplasmic histone H4; involved in telomeric silencing and DNA double-strand break repair              |
| AWRIv2 AWRI_1796       | OPI10                                                                                                                                                                                                                                   |
| LAMAP LAMAP2480_6904   | OPI10                                                                                                                                                                                                                                   |
| CBS2499v2 CBS2499_0636 | OPI10                                                                                                                                                                                                                                   |
| AWRIv2 AWRI_3636       | cis-trans isomerase B                                                                                                                                                                                                                   |
| LAMAP LAMAP2480_6911   | cis-trans isomerase B                                                                                                                                                                                                                   |
| CBS2499v2 CBS2499_0624 | cis-trans isomerase B                                                                                                                                                                                                                   |
| AWRIv2 AWRI_4149       | <b>resistance MFS transporter, drug:H<sup>+</sup> antiporter-2 (14 Spanner) (DHA2) family</b>                                                                                                                                           |
| LAMAP LAMAP2480_6917   | resistance MFS transporter, drug:H <sup>+</sup> antiporter-2 (14 Spanner) (DHA2) family                                                                                                                                                 |
| CBS2499v2 CBS2499_4891 | resistance protein fnx1                                                                                                                                                                                                                 |
| AWRIv2 AWRI_3967       | catalyzes the interconversion of UDP-galactose and UDP-D-glucose in galactose metabolism; also catalyzes the conversion of alpha-D-glucose or alpha-D-galactose to their beta-anomers                                                   |
| LAMAP LAMAP2480_6921   | catalyzes the interconversion of UDP-galactose and UDP-D-glucose in galactose metabolism; also catalyzes the conversion of alpha-D-glucose or alpha-D-galactose to their beta-anomers                                                   |
| CBS2499v2 CBS2499_4898 | catalyzes the interconversion of UDP-galactose and UDP-D-glucose in galactose metabolism; also catalyzes the conversion of alpha-D-glucose or alpha-D-galactose to their beta-anomers                                                   |
|                        | catalyzes the interconversion of UDP-galactose and UDP-D-glucose in galactose metabolism; also catalyzes the conversion of alpha-D-glucose or alpha-D-galactose to their beta-anomers                                                   |
| AWRIv2 AWRI_3972       | 4,6-dehydratase                                                                                                                                                                                                                         |
| LAMAP LAMAP2480_6922   | 4,6-dehydratase                                                                                                                                                                                                                         |
| CBS2499v2 CBS2499_4899 | 4,6-dehydratase                                                                                                                                                                                                                         |
| AWRIv2 AWRI_3973       | <b>transporter, sugar porter (SP) family</b>                                                                                                                                                                                            |
| LAMAP LAMAP2480_6926   | permease                                                                                                                                                                                                                                |
| CBS2499v2 CBS2499_4904 | transporter, sugar porter (SP) family                                                                                                                                                                                                   |
| AWRIv2 AWRI_3977       | carboxyl-terminal hydrolase 16                                                                                                                                                                                                          |
| LAMAP LAMAP2480_6944   | carboxyl-terminal hydrolase 16                                                                                                                                                                                                          |
| CBS2499v2 CBS2499_1546 | enzyme anchored to the outer mitochondrial membrane                                                                                                                                                                                     |
| AWRIv2 AWRI_2659       | ubiquitin-protein ligase BRE1                                                                                                                                                                                                           |
| LAMAP LAMAP2480_6947   | ubiquitin-protein ligase BRE1                                                                                                                                                                                                           |
| CBS2499v2 CBS2499_1543 | ubiquitin-protein ligase BRE1                                                                                                                                                                                                           |
| AWRIv2 AWRI_2664       | ubiquitin-protein ligase BRE1                                                                                                                                                                                                           |
| LAMAP LAMAP2480_6972   | translation initiation factor 3 subunit J                                                                                                                                                                                               |
| CBS2499v2 CBS2499_4206 | translation initiation factor 3 subunit J                                                                                                                                                                                               |

|                        |                                                                                                                                                                                                                                         |
|------------------------|-----------------------------------------------------------------------------------------------------------------------------------------------------------------------------------------------------------------------------------------|
| AWRIv2 AWRI_3065       | translation initiation factor 3 subunit J                                                                                                                                                                                               |
| LAMAP LAMAP2480_6979   | organelle assembly protein TopJ                                                                                                                                                                                                         |
| CBS2499v2 CBS2499_4196 | initiation factor TFIID subunit 9                                                                                                                                                                                                       |
| AWRIv2 AWRI_3069       | organelle assembly protein TopJ                                                                                                                                                                                                         |
| LAMAP LAMAP2480_6984   | methyltransferase C1347.09                                                                                                                                                                                                              |
| CBS2499v2 CBS2499_4192 | methyltransferase C1347.09                                                                                                                                                                                                              |
| AWRIv2 AWRI_3475       | methyltransferase C1347.09                                                                                                                                                                                                              |
| LAMAP LAMAP2480_7013   | protein pof9                                                                                                                                                                                                                            |
| CBS2499v2 CBS2499_3497 | protein pof9                                                                                                                                                                                                                            |
| AWRIv2 AWRI_3532       | factor 1                                                                                                                                                                                                                                |
| LAMAP LAMAP2480_7014   | of telomere capping protein 1                                                                                                                                                                                                           |
| CBS2499v2 CBS2499_0984 | of telomere capping protein 1                                                                                                                                                                                                           |
| AWRIv2 AWRI_0709       | of telomere capping protein 1                                                                                                                                                                                                           |
| LAMAP LAMAP2480_7020   | protein _0880                                                                                                                                                                                                                           |
| CBS2499v2 CBS2499_0973 | protein _0880                                                                                                                                                                                                                           |
| AWRIv2 AWRI_0721       | protein _0880                                                                                                                                                                                                                           |
| LAMAP LAMAP2480_7028   | PBN1                                                                                                                                                                                                                                    |
| CBS2499v2 CBS2499_0966 | PBN1                                                                                                                                                                                                                                    |
| AWRIv2 AWRI_0730       | pbn1                                                                                                                                                                                                                                    |
| LAMAP LAMAP2480_7029   | oligomeric Golgi complex subunit 3                                                                                                                                                                                                      |
| CBS2499v2 CBS2499_0963 | oligomeric Golgi complex subunit 3                                                                                                                                                                                                      |
| AWRIv2 AWRI_0732       | oligomeric Golgi complex subunit 3                                                                                                                                                                                                      |
| LAMAP LAMAP2480_7044   | of unknown function, component of the SWR1 complex, which exchanges histone variant H2AZ (Htz1p) for chromatin-bound histone H2A                                                                                                        |
| CBS2499v2 CBS2499_0721 | of the SWR1 complex; complex exchanges histone variant H2AZ (Htz1p) for chromatin-bound histone H2A; protein abundance increases in response to DNA replication stress; relocalizes to the cytosol in response to hypoxia               |
| AWRIv2 AWRI_0118       | of the SWR1 complex; complex exchanges histone variant H2AZ (Htz1p) for chromatin-bound histone H2A; protein abundance increases in response to DNA replication stress; relocalizes to the cytosol in response to hypoxia               |
| LAMAP LAMAP2480_7045   | polymerase V                                                                                                                                                                                                                            |
| CBS2499v2 CBS2499_0720 | polymerase V                                                                                                                                                                                                                            |
| AWRIv2 AWRI_0119       | polymerase V                                                                                                                                                                                                                            |
| LAMAP LAMAP2480_7057   | structural protein of SCF complexes (which also contain Skp1p, Cdc34p, Hrt1p and an F-box protein) involved in ubiquitination; SCF promotes the G1-S transition by targeting G1 cyclins and the Cln-CDK inhibitor Sic1p for degradation |
| CBS2499v2 CBS2499_1695 | structural protein of SCF complexes (which also contain Skp1p, Cdc34p, Hrt1p and an F-box protein) involved in ubiquitination; SCF promotes the G1-S transition by targeting G1 cyclins and the Cln-CDK inhibitor Sic1p for degradation |
| AWRIv2 AWRI_1401       | structural protein of SCF complexes (which also contain Skp1p, Cdc34p, Hrt1p and an F-box protein) involved in ubiquitination; SCF promotes the G1-S transition by targeting G1 cyclins and the Cln-CDK inhibitor Sic1p for degradation |
| LAMAP LAMAP2480_7062   | utilization trans-activator                                                                                                                                                                                                             |
| CBS2499v2 CBS2499_0752 | utilization trans-activator                                                                                                                                                                                                             |

|                        |                                                                                                                                                                                                                                                                                                                  |
|------------------------|------------------------------------------------------------------------------------------------------------------------------------------------------------------------------------------------------------------------------------------------------------------------------------------------------------------|
| AWRIv2 AWRI_0096       | utilization trans-activator                                                                                                                                                                                                                                                                                      |
| LAMAP LAMAP2480_7063   | protein _0115                                                                                                                                                                                                                                                                                                    |
| CBS2499v2 CBS2499_0751 | protein _0115                                                                                                                                                                                                                                                                                                    |
| AWRIv2 AWRI_0097       | protein _0115                                                                                                                                                                                                                                                                                                    |
| LAMAP LAMAP2480_7105   | protein _0308                                                                                                                                                                                                                                                                                                    |
| CBS2499v2 CBS2499_3960 | protein _0308                                                                                                                                                                                                                                                                                                    |
| AWRIv2 AWRI_0248       | protein _0308                                                                                                                                                                                                                                                                                                    |
| LAMAP LAMAP2480_7106   | I inositol-1,4,5-trisphosphate 5-phosphatase 1                                                                                                                                                                                                                                                                   |
| CBS2499v2 CBS2499_3961 | I inositol polyphosphate 5-phosphatase 1                                                                                                                                                                                                                                                                         |
| AWRIv2 AWRI_0249       | protein HPODL_04556                                                                                                                                                                                                                                                                                              |
| LAMAP LAMAP2480_7112   | protein                                                                                                                                                                                                                                                                                                          |
| CBS2499v2 CBS2499_3969 | protein                                                                                                                                                                                                                                                                                                          |
| AWRIv2 AWRI_0257       | protein _0319                                                                                                                                                                                                                                                                                                    |
| LAMAP LAMAP2480_7122   | protein 11                                                                                                                                                                                                                                                                                                       |
| CBS2499v2 CBS2499_2682 | protein 11                                                                                                                                                                                                                                                                                                       |
| AWRIv2 AWRI_0436       | protein 11                                                                                                                                                                                                                                                                                                       |
| LAMAP LAMAP2480_7124   | distribution protein nudE homolog 1                                                                                                                                                                                                                                                                              |
| CBS2499v2 CBS2499_2680 | distribution protein nudE homolog 1                                                                                                                                                                                                                                                                              |
| AWRIv2 AWRI_0438       | distribution protein nudE homolog 1                                                                                                                                                                                                                                                                              |
| LAMAP LAMAP2480_7125   | <b>MFS-type transporter C1683.03c</b>                                                                                                                                                                                                                                                                            |
| CBS2499v2 CBS2499_2678 | MFS-type transporter C1683.03c                                                                                                                                                                                                                                                                                   |
| AWRIv2 AWRI_0440       | MFS-type transporter C1683.03c                                                                                                                                                                                                                                                                                   |
| LAMAP LAMAP2480_7126   | protein _0537                                                                                                                                                                                                                                                                                                    |
| CBS2499v2 CBS2499_2675 | protein _0537                                                                                                                                                                                                                                                                                                    |
| AWRIv2 AWRI_0442       | protein _0537                                                                                                                                                                                                                                                                                                    |
|                        | protein required for assembly of alpha and beta subunits into the F1 sector of mitochondrial F1F0 ATP synthase; mutation of human ATP12 reduces active ATP synthase levels and is associated with the disorder ATPAF2 deficiency                                                                                 |
| LAMAP LAMAP2480_7130   |                                                                                                                                                                                                                                                                                                                  |
|                        | factor for the F1 sector of mitochondrial F1F0 ATP synthase; conserved protein; required for the assembly of alpha and beta subunits into the F1 sector of the mitochondrial F1F0 ATP synthase; mutation of human ATP12 reduces active ATP synthase levels and is associated with the disorder ATPAF2 deficiency |
| CBS2499v2 CBS2499_3774 |                                                                                                                                                                                                                                                                                                                  |
|                        | factor for the F1 sector of mitochondrial F1F0 ATP synthase; conserved protein; required for the assembly of alpha and beta subunits into the F1 sector of the mitochondrial F1F0 ATP synthase; mutation of human ATP12 reduces active ATP synthase levels and is associated with the disorder ATPAF2 deficiency |
| AWRIv2 AWRI_1131       | O-mannosyltransferase, transfers mannose from dolichyl phosphate-D-mannose to protein serine/threonine residues of secretory proteins; reaction is essential for cell wall rigidity; member of a family of mannosyltransferases                                                                                  |
| LAMAP LAMAP2480_7146   | O-mannosyltransferase; transfers mannose from dolichyl phosphate-D-mannose to protein serine/threonine residues of secretory proteins; reaction is essential for cell wall rigidity; member of a family of mannosyltransferases                                                                                  |
| CBS2499v2 CBS2499_2812 |                                                                                                                                                                                                                                                                                                                  |

|                        |                                                                                                                                                                                                                                                                                  |
|------------------------|----------------------------------------------------------------------------------------------------------------------------------------------------------------------------------------------------------------------------------------------------------------------------------|
| AWRIv2 AWRI_2774       | O-mannosyltransferase; transfers mannose from dolichyl phosphate-D-mannose to protein serine/threonine residues of secretory proteins; reaction is essential for cell wall rigidity; member of a family of mannosyltransferases                                                  |
| LAMAP LAMAP2480_7151   | transport protein CTR1                                                                                                                                                                                                                                                           |
| CBS2499v2 CBS2499_2808 | transport protein CTR1                                                                                                                                                                                                                                                           |
| AWRIv2 AWRI_2778       | transport protein CTR1                                                                                                                                                                                                                                                           |
| LAMAP LAMAP2480_7154   | ste16                                                                                                                                                                                                                                                                            |
| CBS2499v2 CBS2499_2802 | ste16                                                                                                                                                                                                                                                                            |
| AWRIv2 AWRI_2783       | ste16                                                                                                                                                                                                                                                                            |
| LAMAP LAMAP2480_7159   | involved in the transcription of 35s rna genes by rna polymerase i                                                                                                                                                                                                               |
| CBS2499v2 CBS2499_0828 | involved in the transcription of 35s rna genes by rna polymerase i                                                                                                                                                                                                               |
| AWRIv2 AWRI_0036       | involved in the transcription of 35s rna genes by rna polymerase i                                                                                                                                                                                                               |
| LAMAP LAMAP2480_7165   | protein                                                                                                                                                                                                                                                                          |
| CBS2499v2 CBS2499_0823 | protein                                                                                                                                                                                                                                                                          |
| AWRIv2 AWRI_0040       | protein                                                                                                                                                                                                                                                                          |
| LAMAP LAMAP2480_7174   | cis-trans isomerase (cyclophilin) of the endoplasmic reticulum, catalyzes the cis-trans isomerization of peptide bonds N-terminal to proline residues; transcriptionally induced in response to unfolded proteins in the ER                                                      |
| CBS2499v2 CBS2499_4863 | cis-trans isomerase (cyclophilin) of the ER; catalyzes the cis-trans isomerization of peptide bonds N-terminal to proline residues; transcriptionally induced in response to unfolded proteins in the ER; CPR5 has a paralog, CPR2, that arose from the whole genome duplication |
| AWRIv2 AWRI_3669       | cis-trans isomerase (cyclophilin) of the ER; catalyzes the cis-trans isomerization of peptide bonds N-terminal to proline residues; transcriptionally induced in response to unfolded proteins in the ER; CPR5 has a paralog, CPR2, that arose from the whole genome duplication |
| LAMAP LAMAP2480_7176   | protein _4374                                                                                                                                                                                                                                                                    |
| CBS2499v2 CBS2499_4858 | protein _4374                                                                                                                                                                                                                                                                    |
| AWRIv2 AWRI_3664       | protein _4374                                                                                                                                                                                                                                                                    |
| LAMAP LAMAP2480_7177   | subunit of the COMPASS (Set1C) complex, which methylates histone H3 on lysine 4 and is required in transcriptional silencing near telomeres; WD40 beta propeller superfamily member and ortholog of mammalian WDR5                                                               |
| CBS2499v2 CBS2499_4857 | subunit of the COMPASS (Set1C) complex; COMPASS methylates histone H3 on lysine 4 and is required in transcriptional silencing near telomeres; WD40 beta propeller superfamily member and ortholog of mammalian WDR5                                                             |
| AWRIv2 AWRI_3663       | repeat-containing protein 5                                                                                                                                                                                                                                                      |
| LAMAP LAMAP2480_7197   | intermembrane space cysteine motif-containing protein MIC17                                                                                                                                                                                                                      |
| CBS2499v2 CBS2499_3426 | intermembrane space cysteine motif-containing protein MIX17                                                                                                                                                                                                                      |
| AWRIv2 AWRI_3373       | intermembrane space cysteine motif-containing protein MIX17                                                                                                                                                                                                                      |
| LAMAP LAMAP2480_7199   | WD repeat-containing protein C2A9.03                                                                                                                                                                                                                                             |
| CBS2499v2 CBS2499_3427 | WD repeat-containing protein C2A9.03                                                                                                                                                                                                                                             |
| AWRIv2 AWRI_3372       | WD repeat-containing protein C2A9.03                                                                                                                                                                                                                                             |
| LAMAP LAMAP2480_7203   | protein HPODL_01905                                                                                                                                                                                                                                                              |
| CBS2499v2 CBS2499_3436 | protein JL09_g2106                                                                                                                                                                                                                                                               |
| AWRIv2 AWRI_3367       | protein _4041                                                                                                                                                                                                                                                                    |
| LAMAP LAMAP2480_7204   | gis3                                                                                                                                                                                                                                                                             |

|                        |                                                                                                                                                                                                                                                                                                                                                                                                                                                              |
|------------------------|--------------------------------------------------------------------------------------------------------------------------------------------------------------------------------------------------------------------------------------------------------------------------------------------------------------------------------------------------------------------------------------------------------------------------------------------------------------|
| CBS2499v2 CBS2499_3439 | gis3                                                                                                                                                                                                                                                                                                                                                                                                                                                         |
| AWRIv2 AWRI_3363       | gis3                                                                                                                                                                                                                                                                                                                                                                                                                                                         |
| LAMAP LAMAP2480_7208   | regulatory protein GLN3                                                                                                                                                                                                                                                                                                                                                                                                                                      |
| CBS2499v2 CBS2499_2306 | regulatory protein GLN3                                                                                                                                                                                                                                                                                                                                                                                                                                      |
| AWRIv2 AWRI_1383       | regulatory protein GLN3                                                                                                                                                                                                                                                                                                                                                                                                                                      |
| LAMAP LAMAP2480_7218   | required for export of the ribosomal subunits; associates with the RNA components of the pre-ribosomes; has a role in nuclear import in association with Pse1p; contains HEAT-repeats                                                                                                                                                                                                                                                                        |
| CBS2499v2 CBS2499_1558 | required for export of the ribosomal subunits; associates with the RNA components of the pre-ribosomes; has a role in nuclear import in association with Pse1p; also plays a role in the cell cycle and the DNA damage response; contains HEAT-repeats                                                                                                                                                                                                       |
| AWRIv2 AWRI_2647       | required for export of the ribosomal subunits; associates with the RNA components of the pre-ribosomes; has a role in nuclear import in association with Pse1p; also plays a role in the cell cycle and the DNA damage response; contains HEAT-repeats                                                                                                                                                                                                       |
| LAMAP LAMAP2480_7219   | initiation factor TFIID subunit 3                                                                                                                                                                                                                                                                                                                                                                                                                            |
| CBS2499v2 CBS2499_1557 | initiation factor TFIID subunit 3                                                                                                                                                                                                                                                                                                                                                                                                                            |
| AWRIv2 AWRI_2649       | protein _3190                                                                                                                                                                                                                                                                                                                                                                                                                                                |
| LAMAP LAMAP2480_7238   | targeting signal receptor                                                                                                                                                                                                                                                                                                                                                                                                                                    |
| CBS2499v2 CBS2499_0390 | PEP-CTERM system TPR-repeat lipoprotein                                                                                                                                                                                                                                                                                                                                                                                                                      |
| AWRIv2 AWRI_3720       | targeting signal receptor                                                                                                                                                                                                                                                                                                                                                                                                                                    |
| LAMAP LAMAP2480_7248   | membrane protein PER10                                                                                                                                                                                                                                                                                                                                                                                                                                       |
| CBS2499v2 CBS2499_1161 | membrane protein PER10                                                                                                                                                                                                                                                                                                                                                                                                                                       |
| AWRIv2 AWRI_2452       | membrane protein PER10                                                                                                                                                                                                                                                                                                                                                                                                                                       |
| LAMAP LAMAP2480_7275   | protein kinase that phosphorylates and downregulates flippase activator Fpk1p; mutations affect receptor-mediated endocytosis and sphingolipid-mediated and cell integrity signaling pathways; homolog of mammalian kinase SGK                                                                                                                                                                                                                               |
| CBS2499v2 CBS2499_4381 | protein kinase; phosphorylates and downregulates flippase activator Fpk1p; inactivates Orm1p and Orm2p (inhibitors of serine:palmitoyl-coenzyme A transferase) by phosphorylation in response to compromised sphingolipid synthesis; mutations affect receptor-mediated endocytosis and sphingolipid-mediated and cell integrity signaling pathways; homolog of mammalian kinase SGK; YPK1 has a paralog, YPK2, that arose from the whole genome duplication |
| AWRIv2 AWRI_4070       | protein kinase; phosphorylates and downregulates flippase activator Fpk1p; inactivates Orm1p and Orm2p (inhibitors of serine:palmitoyl-coenzyme A transferase) by phosphorylation in response to compromised sphingolipid synthesis; mutations affect receptor-mediated endocytosis and sphingolipid-mediated and cell integrity signaling pathways; homolog of mammalian kinase SGK; YPK1 has a paralog, YPK2, that arose from the whole genome duplication |
| LAMAP LAMAP2480_7326   | protein YML020W                                                                                                                                                                                                                                                                                                                                                                                                                                              |
| CBS2499v2 CBS2499_3651 | protein YML020W                                                                                                                                                                                                                                                                                                                                                                                                                                              |
| AWRIv2 AWRI_1775       | protein YML020W                                                                                                                                                                                                                                                                                                                                                                                                                                              |
| LAMAP LAMAP2480_7338   | segregation in meiosis protein 3                                                                                                                                                                                                                                                                                                                                                                                                                             |
| CBS2499v2 CBS2499_2708 | segregation in meiosis protein 3                                                                                                                                                                                                                                                                                                                                                                                                                             |
| AWRIv2 AWRI_0408       | segregation in meiosis protein 3                                                                                                                                                                                                                                                                                                                                                                                                                             |
| LAMAP LAMAP2480_7344   | protein that inhibits replication of Brome mosaic virus in <i>S. cerevisiae</i> , which is a model system for studying replication of positive-strand RNA viruses in their natural hosts; deletion increases stop codon readthrough                                                                                                                                                                                                                          |

|                        |                                                                                                                                                                                                                                  |
|------------------------|----------------------------------------------------------------------------------------------------------------------------------------------------------------------------------------------------------------------------------|
| CBS2499v2 CBS2499_2628 | of translation termination 1                                                                                                                                                                                                     |
| AWRIv2 AWRI_0487       | of translation termination 1                                                                                                                                                                                                     |
| LAMAP LAMAP2480_7345   | uroporphyrinogen III transmethylese; involved in the biosynthesis of siroheme, a prosthetic group used by sulfite reductase; required for sulfate assimilation and methionine biosynthesis                                       |
| CBS2499v2 CBS2499_2627 | uroporphyrinogen III transmethylese; involved in the biosynthesis of siroheme, a prosthetic group used by sulfite reductase; required for sulfate assimilation and methionine biosynthesis                                       |
| AWRIv2 AWRI_0488       | uroporphyrinogen III transmethylese; involved in the biosynthesis of siroheme, a prosthetic group used by sulfite reductase; required for sulfate assimilation and methionine biosynthesis                                       |
| LAMAP LAMAP2480_7346   | protein subunit of the glycosylphosphatidylinositol transamidase complex that adds GPIs to newly synthesized proteins; human PIG-Sp homolog                                                                                      |
| CBS2499v2 CBS2499_2624 | transamidase component GPI17                                                                                                                                                                                                     |
| AWRIv2 AWRI_0491       | transamidase component GPI17                                                                                                                                                                                                     |
| LAMAP LAMAP2480_7349   | repeat-containing protein At3g06920                                                                                                                                                                                              |
| CBS2499v2 CBS2499_2621 | repeat-containing protein At1g09900                                                                                                                                                                                              |
| AWRIv2 AWRI_0494       | repeat-containing protein At4g31850, chloroplastic                                                                                                                                                                               |
| LAMAP LAMAP2480_7374   | intracellular esterase that can function as an S-formylglutathione hydrolase; may be involved in the detoxification of formaldehyde, which can be metabolized to S-formylglutathione; similar to human esterase D                |
| CBS2499v2 CBS2499_2477 | that can function as an S-formylglutathione hydrolase; non-essential intracellular esterase; may be involved in the detoxification of formaldehyde, which can be metabolized to S-formylglutathione; similar to human esterase D |
| AWRIv2 AWRI_0515       | esterase D                                                                                                                                                                                                                       |
| LAMAP LAMAP2480_7388   | protein 2                                                                                                                                                                                                                        |
| CBS2499v2 CBS2499_0678 | 3-phosphate-binding protein 2                                                                                                                                                                                                    |
| AWRIv2 AWRI_0162       | 3-phosphate-binding protein 2                                                                                                                                                                                                    |
| LAMAP LAMAP2480_7389   | acid permease                                                                                                                                                                                                                    |
| CBS2499v2 CBS2499_0677 | acid permease                                                                                                                                                                                                                    |
| AWRIv2 AWRI_0163       | acid permease                                                                                                                                                                                                                    |
| LAMAP LAMAP2480_7394   | protein _0202                                                                                                                                                                                                                    |
| CBS2499v2 CBS2499_0671 | protein _0202                                                                                                                                                                                                                    |
| AWRIv2 AWRI_0170       | protein _0202                                                                                                                                                                                                                    |
| LAMAP LAMAP2480_7399   | decay protein 4                                                                                                                                                                                                                  |
| CBS2499v2 CBS2499_1124 | decay protein 4                                                                                                                                                                                                                  |
| AWRIv2 AWRI_2482       | decay protein 4                                                                                                                                                                                                                  |
| LAMAP LAMAP2480_7419   |                                                                                                                                                                                                                                  |
| CBS2499v2 CBS2499_4598 |                                                                                                                                                                                                                                  |
| AWRIv2 AWRI_1098       |                                                                                                                                                                                                                                  |
| LAMAP LAMAP2480_7420   | <b>nucleoside transporter family</b>                                                                                                                                                                                             |
| CBS2499v2 CBS2499_4599 | nucleoside transporter family                                                                                                                                                                                                    |
| AWRIv2 AWRI_1099       | nucleoside transporter family                                                                                                                                                                                                    |
| LAMAP LAMAP2480_7421   | <b>beta-glucosidase I</b>                                                                                                                                                                                                        |
| CBS2499v2 CBS2499_4600 | beta-glucosidase I                                                                                                                                                                                                               |

|                        |                                                                                                                                                                                                                                                                                                                                                                                               |
|------------------------|-----------------------------------------------------------------------------------------------------------------------------------------------------------------------------------------------------------------------------------------------------------------------------------------------------------------------------------------------------------------------------------------------|
| AWRIv2 AWRI_1100       | beta-glucosidase I                                                                                                                                                                                                                                                                                                                                                                            |
| LAMAP LAMAP2480_7422   | <b>transporter C36.03c</b>                                                                                                                                                                                                                                                                                                                                                                    |
| CBS2499v2 CBS2499_4601 | transporter C36.03c                                                                                                                                                                                                                                                                                                                                                                           |
| AWRIv2 AWRI_1101       | transporter C36.03c                                                                                                                                                                                                                                                                                                                                                                           |
| LAMAP LAMAP2480_7425   | factor, CC1-like family                                                                                                                                                                                                                                                                                                                                                                       |
| CBS2499v2 CBS2499_2834 | factor, CC1-like family                                                                                                                                                                                                                                                                                                                                                                       |
| AWRIv2 AWRI_2911       | factor, CC1-like family                                                                                                                                                                                                                                                                                                                                                                       |
| LAMAP LAMAP2480_7427   | protein PRP40                                                                                                                                                                                                                                                                                                                                                                                 |
| CBS2499v2 CBS2499_2837 | protein PRP40                                                                                                                                                                                                                                                                                                                                                                                 |
| AWRIv2 AWRI_2913       | protein PRP40                                                                                                                                                                                                                                                                                                                                                                                 |
| LAMAP LAMAP2480_7429   | protein of unknown function; green fluorescent protein (GFP)-fusion protein localizes to the cytoplasm; YIR007W is a non-essential gene                                                                                                                                                                                                                                                       |
| CBS2499v2 CBS2499_2839 | glycosidase; green fluorescent protein (GFP)-fusion protein localizes to the cytoplasm; YIR007W is a non-essential gene                                                                                                                                                                                                                                                                       |
| AWRIv2 AWRI_2915       | glycosidase; green fluorescent protein (GFP)-fusion protein localizes to the cytoplasm; YIR007W is a non-essential gene                                                                                                                                                                                                                                                                       |
| LAMAP LAMAP2480_7446   | MUM2                                                                                                                                                                                                                                                                                                                                                                                          |
| CBS2499v2 CBS2499_2426 | MUM2                                                                                                                                                                                                                                                                                                                                                                                          |
| AWRIv2 AWRI_3303       | protein _3963                                                                                                                                                                                                                                                                                                                                                                                 |
| LAMAP LAMAP2480_7452   | trans-sulfuration enzyme YHR112C                                                                                                                                                                                                                                                                                                                                                              |
| CBS2499v2 CBS2499_3040 | trans-sulfuration enzyme YHR112C                                                                                                                                                                                                                                                                                                                                                              |
| AWRIv2 AWRI_1262       | trans-sulfuration enzyme YHR112C                                                                                                                                                                                                                                                                                                                                                              |
| LAMAP LAMAP2480_7464   | <b>endopeptidase ctsD</b>                                                                                                                                                                                                                                                                                                                                                                     |
| CBS2499v2 CBS2499_2449 | endopeptidase ctsD                                                                                                                                                                                                                                                                                                                                                                            |
| AWRIv2 AWRI_0502       | aspartic-type endopeptidase CTSD (Fragment)                                                                                                                                                                                                                                                                                                                                                   |
| LAMAP LAMAP2480_7477   | protein YNL144C                                                                                                                                                                                                                                                                                                                                                                               |
| CBS2499v2 CBS2499_2753 | protein YNL144C                                                                                                                                                                                                                                                                                                                                                                               |
| AWRIv2 AWRI_0359       | protein YNL144C                                                                                                                                                                                                                                                                                                                                                                               |
| LAMAP LAMAP2480_7482   | <b>and cobalt transport protein CorA</b>                                                                                                                                                                                                                                                                                                                                                      |
| CBS2499v2 CBS2499_2748 | and cobalt transport protein CorA                                                                                                                                                                                                                                                                                                                                                             |
| AWRIv2 AWRI_0365       | and cobalt transport protein CorA                                                                                                                                                                                                                                                                                                                                                             |
| LAMAP LAMAP2480_7502   | protein 4                                                                                                                                                                                                                                                                                                                                                                                     |
| CBS2499v2 CBS2499_1135 | protein 4                                                                                                                                                                                                                                                                                                                                                                                     |
| AWRIv2 AWRI_2473       |                                                                                                                                                                                                                                                                                                                                                                                               |
| LAMAP LAMAP2480_7504   | <b>membrane zinc transporter, transports zinc from the cytosol into the vacuole for storage; also has a role in resistance to zinc shock resulting from a sudden influx of zinc into the cytoplasm</b>                                                                                                                                                                                        |
| CBS2499v2 CBS2499_1132 | membrane zinc transporter; transports zinc from cytosol to vacuole for storage; also has role in resistance to zinc shock resulting from sudden influx of zinc into cytoplasm; human ortholog SLC30A10 functions as a Mn transporter and mutations in SLC30A10 cause neurotoxic accumulation of Mn in liver and brain; ZRC1 has a paralog, COT1, that arose from the whole genome duplication |

|                        |                                                                                                                                                                                                                                                                                                                                                                                               |
|------------------------|-----------------------------------------------------------------------------------------------------------------------------------------------------------------------------------------------------------------------------------------------------------------------------------------------------------------------------------------------------------------------------------------------|
| AWRIv2 AWRI_2475       | membrane zinc transporter; transports zinc from cytosol to vacuole for storage; also has role in resistance to zinc shock resulting from sudden influx of zinc into cytoplasm; human ortholog SLC30A10 functions as a Mn transporter and mutations in SLC30A10 cause neurotoxic accumulation of Mn in liver and brain; ZRC1 has a paralog, COT1, that arose from the whole genome duplication |
| LAMAP LAMAP2480_7523   | peroxisomal protein POX18                                                                                                                                                                                                                                                                                                                                                                     |
| CBS2499v2 CBS2499_3400 | peroxisomal protein POX18                                                                                                                                                                                                                                                                                                                                                                     |
| AWRIv2 AWRI_3494       | peroxisomal protein POX18                                                                                                                                                                                                                                                                                                                                                                     |
| LAMAP LAMAP2480_7526   | domain-containing protein 2 homolog A                                                                                                                                                                                                                                                                                                                                                         |
| CBS2499v2 CBS2499_3406 | domain-containing protein 2 homolog A                                                                                                                                                                                                                                                                                                                                                         |
| AWRIv2 AWRI_3500       | domain-containing protein 2 homolog A                                                                                                                                                                                                                                                                                                                                                         |
| LAMAP LAMAP2480_7527   | protein _4202                                                                                                                                                                                                                                                                                                                                                                                 |
| CBS2499v2 CBS2499_3408 | protein _4202                                                                                                                                                                                                                                                                                                                                                                                 |
| AWRIv2 AWRI_3502       | protein _4202                                                                                                                                                                                                                                                                                                                                                                                 |
| LAMAP LAMAP2480_7542   | UFE1                                                                                                                                                                                                                                                                                                                                                                                          |
| CBS2499v2 CBS2499_3515 | UFE1                                                                                                                                                                                                                                                                                                                                                                                          |
| AWRIv2 AWRI_3327       | required for er membrane fusion and vesicular traffic                                                                                                                                                                                                                                                                                                                                         |
| LAMAP LAMAP2480_7546   | protein seph                                                                                                                                                                                                                                                                                                                                                                                  |
| CBS2499v2 CBS2499_3879 | division control protein 7                                                                                                                                                                                                                                                                                                                                                                    |
| AWRIv2 AWRI_1870       | division control protein 7                                                                                                                                                                                                                                                                                                                                                                    |
| LAMAP LAMAP2480_7547   | protein PP7435_Ch4-0240                                                                                                                                                                                                                                                                                                                                                                       |
| CBS2499v2 CBS2499_3878 | protein JL09_g2862                                                                                                                                                                                                                                                                                                                                                                            |
| AWRIv2 AWRI_1869       | protein                                                                                                                                                                                                                                                                                                                                                                                       |
| LAMAP LAMAP2480_7550   | midA homolog, mitochondrial                                                                                                                                                                                                                                                                                                                                                                   |
| CBS2499v2 CBS2499_3875 | dehydrogenase [ubiquinone] complex I, assembly factor 7                                                                                                                                                                                                                                                                                                                                       |
| AWRIv2 AWRI_1867       | protein JL09_g2894                                                                                                                                                                                                                                                                                                                                                                            |
|                        | <b>metal ion transporter involved in manganese homeostasis; has broad specificity for di-valent and tri-valent metals; post-translationally regulated by levels of metal ions; member of the Nramp family of metal transport proteins</b>                                                                                                                                                     |
| LAMAP LAMAP2480_7551   | metal ion transporter involved in manganese homeostasis; has broad specificity for di-valent and tri-valent metals; post-translationally regulated by levels of metal ions; member of the Nramp family of metal transport proteins                                                                                                                                                            |
| CBS2499v2 CBS2499_3874 | metal ion transporter involved in manganese homeostasis; has broad specificity for di-valent and tri-valent metals; post-translationally regulated by levels of metal ions; member of the Nramp family of metal transport proteins                                                                                                                                                            |
| AWRIv2 AWRI_1866       | histone deacetylase SIR2                                                                                                                                                                                                                                                                                                                                                                      |
| LAMAP LAMAP2480_7553   | histone deacetylase HST4                                                                                                                                                                                                                                                                                                                                                                      |
| CBS2499v2 CBS2499_3871 | histone deacetylase HST4                                                                                                                                                                                                                                                                                                                                                                      |
| AWRIv2 AWRI_1864       | of Elongator complex, which is required for modification of wobble nucleosides in tRNA; target of Kluyveromyces lactis zymocin                                                                                                                                                                                                                                                                |
| LAMAP LAMAP2480_7565   | of Elongator complex; Elongator is required for modification of wobble nucleosides in tRNA; target of Kluyveromyces lactis zymocin                                                                                                                                                                                                                                                            |
| CBS2499v2 CBS2499_1243 | of Elongator complex; Elongator is required for modification of wobble nucleosides in tRNA; target of Kluyveromyces lactis zymocin                                                                                                                                                                                                                                                            |
| AWRIv2 AWRI_1698       | of Elongator complex; Elongator is required for modification of wobble nucleosides in tRNA; target of Kluyveromyces lactis zymocin                                                                                                                                                                                                                                                            |

|                        |                                                                                                                                                                                                  |
|------------------------|--------------------------------------------------------------------------------------------------------------------------------------------------------------------------------------------------|
| LAMAP LAMAP2480_7570   | protein YOR389W                                                                                                                                                                                  |
| CBS2499v2 CBS2499_2672 | protein YOR389W                                                                                                                                                                                  |
| AWRIv2 AWRI_0445       | protein YOR389W                                                                                                                                                                                  |
| LAMAP LAMAP2480_7611   | complex component SEC15                                                                                                                                                                          |
| CBS2499v2 CBS2499_0924 | complex component SEC15                                                                                                                                                                          |
| AWRIv2 AWRI_2502       | complex component SEC15                                                                                                                                                                          |
| LAMAP LAMAP2480_7613   | protein C1259.12c                                                                                                                                                                                |
| CBS2499v2 CBS2499_0926 | protein C1259.12c                                                                                                                                                                                |
| AWRIv2 AWRI_2500       | protein C1259.12c                                                                                                                                                                                |
| LAMAP LAMAP2480_7631   | to ER traffic protein 2                                                                                                                                                                          |
| CBS2499v2 CBS2499_2165 | to ER traffic protein 2                                                                                                                                                                          |
| AWRIv2 AWRI_2884       | to er traffic protein 2                                                                                                                                                                          |
| LAMAP LAMAP2480_7634   | monophosphate (dCMP) deaminase required for dCTP and dTTP synthesis; expression is NOT cell cycle regulated                                                                                      |
| CBS2499v2 CBS2499_2173 | monophosphate (dCMP) deaminase; involved in dUMP and dTMP biosynthesis; expression is NOT cell cycle regulated                                                                                   |
| AWRIv2 AWRI_2876       | monophosphate (dCMP) deaminase; involved in dUMP and dTMP biosynthesis; expression is NOT cell cycle regulated                                                                                   |
| LAMAP LAMAP2480_7637   | carboxyl-terminal hydrolase 3                                                                                                                                                                    |
| CBS2499v2 CBS2499_2179 | carboxyl-terminal hydrolase 3                                                                                                                                                                    |
| AWRIv2 AWRI_2872       | carboxyl-terminal hydrolase 3                                                                                                                                                                    |
| LAMAP LAMAP2480_7640   | protein _0464                                                                                                                                                                                    |
| CBS2499v2 CBS2499_2735 | protein _0464                                                                                                                                                                                    |
| AWRIv2 AWRI_0379       | protein _0464                                                                                                                                                                                    |
| LAMAP LAMAP2480_7645   | glycosylase                                                                                                                                                                                      |
| CBS2499v2 CBS2499_2740 | glycosylase                                                                                                                                                                                      |
| AWRIv2 AWRI_0373       | glycosylase                                                                                                                                                                                      |
| LAMAP LAMAP2480_7646   | N-acetyltransferase 1                                                                                                                                                                            |
| CBS2499v2 CBS2499_2741 | N-acetyltransferase 1                                                                                                                                                                            |
| AWRIv2 AWRI_0372       | N-acetyltransferase 1                                                                                                                                                                            |
| LAMAP LAMAP2480_7659   | protein that binds nucleosomes; a component of the SWR1 complex, which exchanges histone variant H2AZ (Htz1p) for chromatin-bound histone H2A                                                    |
| CBS2499v2 CBS2499_0709 | protein that binds nucleosomes; a component of the SWR1 complex, which exchanges histone variant H2AZ (Htz1p) for chromatin-bound histone H2A                                                    |
| AWRIv2 AWRI_0131       | protein ARP6                                                                                                                                                                                     |
| LAMAP LAMAP2480_7674   | <b>ABC transporter</b>                                                                                                                                                                           |
| CBS2499v2 CBS2499_3031 | ABC transporter                                                                                                                                                                                  |
| AWRIv2 AWRI_1271       | ABC transporter                                                                                                                                                                                  |
| LAMAP LAMAP2480_7703   | ribosomal protein of the large subunit                                                                                                                                                           |
| CBS2499v2 CBS2499_4547 | ribosomal protein of the large subunit                                                                                                                                                           |
| AWRIv2 AWRI_1057       | ribosomal protein of the large subunit                                                                                                                                                           |
| LAMAP LAMAP2480_7705   | synthase, catalyzes the synthesis of phosphatidylglycerolphosphate from CDP-diacylglycerol and sn-glycerol 3-phosphate in the first committed and rate-limiting step of cardiolipin biosynthesis |

|                        |                                                                                                                                                                                                                                                                                                  |
|------------------------|--------------------------------------------------------------------------------------------------------------------------------------------------------------------------------------------------------------------------------------------------------------------------------------------------|
| CBS2499v2 CBS2499_4550 | synthase; catalyzes the synthesis of phosphatidylglycerolphosphate from CDP-diacylglycerol and sn-glycerol 3-phosphate in the first committed and rate-limiting step of cardiolipin biosynthesis                                                                                                 |
| AWRIv2 AWRI_1060       | synthase; catalyzes the synthesis of phosphatidylglycerolphosphate from CDP-diacylglycerol and sn-glycerol 3-phosphate in the first committed and rate-limiting step of cardiolipin biosynthesis                                                                                                 |
| LAMAP LAMAP2480_7706   | long chain fatty acyl-CoA synthetase and long chain fatty acid transporter; activates imported fatty acids with a preference for very long lengths (C20-C26); has a separate function in the transport of long chain fatty acids                                                                 |
| CBS2499v2 CBS2499_4552 | long chain fatty acyl-CoA synthetase and fatty acid transporter; activates imported fatty acids with a preference for very long lengths (C20-C26); has a separate function in the transport of long chain fatty acids                                                                            |
| AWRIv2 AWRI_1062       | long chain fatty acyl-CoA synthetase and fatty acid transporter; activates imported fatty acids with a preference for very long lengths (C20-C26); has a separate function in the transport of long chain fatty acids                                                                            |
| LAMAP LAMAP2480_7752   | alpha glucosidase I, ER type II integral membrane N-glycoprotein involved in assembly of cell wall beta 1,6 glucan and asparagine-linked protein glycosylation; also involved in ER protein quality control and sensing of ER stress                                                             |
| CBS2499v2 CBS2499_0829 | alpha glucosidase I; ER type II integral membrane N-glycoprotein involved in assembly of cell wall beta 1,6 glucan and asparagine-linked protein glycosylation; also involved in ER protein quality control and sensing of ER stress                                                             |
| AWRIv2 AWRI_0035       | alpha glucosidase I; ER type II integral membrane N-glycoprotein involved in assembly of cell wall beta 1,6 glucan and asparagine-linked protein glycosylation; also involved in ER protein quality control and sensing of ER stress                                                             |
| LAMAP LAMAP2480_7764   | serine/threonine protein kinase involved in mating; phosphoactivated by Ste7p; substrates include Ste12p, Far1p, Bni1p, Sst2p; inhibits invasive growth during mating by phosphorylating Tec1p, promoting its degradation                                                                        |
| CBS2499v2 CBS2499_4844 | serine/threonine protein kinase involved in mating; phosphoactivated by Ste7p; substrates include Ste12p, Far1p, Bni1p, Sst2p; inhibits invasive growth during mating by phosphorylating Tec1p, promoting its; inhibits recruitment of Ste5p, Cdc42p-mediated asymmetry and mating morphogenesis |
| AWRIv2 AWRI_3412       | serine/threonine protein kinase involved in mating; phosphoactivated by Ste7p; substrates include Ste12p, Far1p, Bni1p, Sst2p; inhibits invasive growth during mating by phosphorylating Tec1p, promoting its; inhibits recruitment of Ste5p, Cdc42p-mediated asymmetry and mating morphogenesis |
| LAMAP LAMAP2480_7770   | diffusion facilitator family transporter                                                                                                                                                                                                                                                         |
| CBS2499v2 CBS2499_0433 | diffusion facilitator family transporter                                                                                                                                                                                                                                                         |
| AWRIv2 AWRI_3926       | diffusion facilitator family transporter                                                                                                                                                                                                                                                         |
| LAMAP LAMAP2480_7794   | endo-beta-N-acetylglucosaminidase                                                                                                                                                                                                                                                                |
| CBS2499v2 CBS2499_2790 | endo-beta-N-acetylglucosaminidase                                                                                                                                                                                                                                                                |
| AWRIv2 AWRI_2799       | endo-beta-N-acetylglucosaminidase                                                                                                                                                                                                                                                                |
| LAMAP LAMAP2480_7795   | translation initiation factor 3 subunit C                                                                                                                                                                                                                                                        |
| CBS2499v2 CBS2499_2793 | translation initiation factor 3 subunit C                                                                                                                                                                                                                                                        |
| AWRIv2 AWRI_2796       | translation initiation factor 3 subunit C                                                                                                                                                                                                                                                        |
| LAMAP LAMAP2480_7796   | ribosomal protein RSM18, mitochondrial                                                                                                                                                                                                                                                           |
| CBS2499v2 CBS2499_2796 | protein S18                                                                                                                                                                                                                                                                                      |

|                        |                                                                                                                                                                            |
|------------------------|----------------------------------------------------------------------------------------------------------------------------------------------------------------------------|
| AWRIv2 AWRI_2791       | protein S18                                                                                                                                                                |
| LAMAP LAMAP2480_7798   | domain-containing histone demethylation protein 1                                                                                                                          |
| CBS2499v2 CBS2499_2795 | domain-containing histone demethylation protein 1                                                                                                                          |
| AWRIv2 AWRI_2793       | domain-containing histone demethylation protein 1                                                                                                                          |
| LAMAP LAMAP2480_7813   | protein                                                                                                                                                                    |
| CBS2499v2 CBS2499_2492 | protein                                                                                                                                                                    |
| AWRIv2 AWRI_0521       | protein                                                                                                                                                                    |
| LAMAP LAMAP2480_7816   |                                                                                                                                                                            |
| CBS2499v2 CBS2499_2653 | derlin-2 homolog                                                                                                                                                           |
| AWRIv2 AWRI_0463       | derlin-2 homolog                                                                                                                                                           |
| LAMAP LAMAP2480_7820   | <b>uptake protein, Trk family</b>                                                                                                                                          |
| CBS2499v2 CBS2499_2662 | uptake protein, Trk family                                                                                                                                                 |
| AWRIv2 AWRI_0454       | uptake protein, Trk family                                                                                                                                                 |
| LAMAP LAMAP2480_7821   | factor, CC1-like family                                                                                                                                                    |
| CBS2499v2 CBS2499_2664 | factor, CC1-like family                                                                                                                                                    |
| AWRIv2 AWRI_0452       | factor, CC1-like family                                                                                                                                                    |
|                        | subunit of the mitochondrial processing protease (MPP), essential processing enzyme that cleaves the N-terminal targeting sequences from mitochondrially imported proteins |
| LAMAP LAMAP2480_7826   | subunit of the mitochondrial processing protease (MPP); essential processing enzyme that cleaves the N-terminal targeting sequences from mitochondrially imported proteins |
|                        | subunit of the mitochondrial processing protease (MPP); essential processing enzyme that cleaves the N-terminal targeting sequences from mitochondrially imported proteins |
| CBS2499v2 CBS2499_2831 | subunit of the mitochondrial processing protease (MPP); essential processing enzyme that cleaves the N-terminal targeting sequences from mitochondrially imported proteins |
|                        | zinc finger-like                                                                                                                                                           |
| AWRIv2 AWRI_2753       | zinc finger-like                                                                                                                                                           |
| LAMAP LAMAP2480_7828   | zinc finger-like                                                                                                                                                           |
| CBS2499v2 CBS2499_2829 | O-acyltransferase 2                                                                                                                                                        |
| AWRIv2 AWRI_2755       | O-acyltransferase 2                                                                                                                                                        |
| LAMAP LAMAP2480_7832   | O-acyltransferase 2                                                                                                                                                        |
| CBS2499v2 CBS2499_2824 | protein C12C2.05c                                                                                                                                                          |
| AWRIv2 AWRI_2761       | BZZ1                                                                                                                                                                       |
| LAMAP LAMAP2480_7879   | BZZ1                                                                                                                                                                       |
| CBS2499v2 CBS2499_3525 | inducer phosphatase                                                                                                                                                        |
| AWRIv2 AWRI_3338       | inducer phosphatase                                                                                                                                                        |
| LAMAP LAMAP2480_7888   | inducer phosphatase                                                                                                                                                        |
| CBS2499v2 CBS2499_2629 | protein _0627, partial                                                                                                                                                     |
| AWRIv2 AWRI_0486       | protein _0627, partial                                                                                                                                                     |
| LAMAP LAMAP2480_7901   | protein _0627, partial                                                                                                                                                     |
| CBS2499v2 CBS2499_2483 | NUP49/NSP49                                                                                                                                                                |
| AWRIv2 AWRI_0519       | NUP49/NSP49                                                                                                                                                                |
| LAMAP LAMAP2480_7919   | NUP49/NSP49                                                                                                                                                                |
| CBS2499v2 CBS2499_4417 | endonuclease subunit Sen34                                                                                                                                                 |
| AWRIv2 AWRI_2090       | intron endonuclease                                                                                                                                                        |
| LAMAP LAMAP2480_7924   | intron endonuclease                                                                                                                                                        |
| CBS2499v2 CBS2499_4125 |                                                                                                                                                                            |
| AWRIv2 AWRI_4102       |                                                                                                                                                                            |

|                        |                                                                                                                                                                                                                                                |
|------------------------|------------------------------------------------------------------------------------------------------------------------------------------------------------------------------------------------------------------------------------------------|
| LAMAP LAMAP2480_7932   | required for mismatch repair in mitosis and meiosis as well as crossing over during meiosis; forms a complex with Pms1p and Msh2p-Msh3p during mismatch repair; human homolog is associated with hereditary non-polyposis colon cancer         |
| CBS2499v2 CBS2499_4880 | required for mismatch repair in mitosis and meiosis; also required for crossing over during meiosis; forms a complex with Pms1p and Msh2p-Msh3p during mismatch repair; human homolog is associated with hereditary non-polyposis colon cancer |
| AWRIv2 AWRI_4131       | required for mismatch repair in mitosis and meiosis; also required for crossing over during meiosis; forms a complex with Pms1p and Msh2p-Msh3p during mismatch repair; human homolog is associated with hereditary non-polyposis colon cancer |
| LAMAP LAMAP2480_7944   | reticulum transmembrane protein 1                                                                                                                                                                                                              |
| CBS2499v2 CBS2499_2632 | reticulum transmembrane protein 1                                                                                                                                                                                                              |
| AWRIv2 AWRI_0483       | protein                                                                                                                                                                                                                                        |
| LAMAP LAMAP2480_8006   | of 66S pre-ribosomal particles, involved in 60S ribosomal subunit biogenesis                                                                                                                                                                   |
| CBS2499v2 CBS2499_2833 | of 66S pre-ribosomal particles; involved in 60S ribosomal subunit biogenesis                                                                                                                                                                   |
| AWRIv2 AWRI_2751       | of 66S pre-ribosomal particles; involved in 60S ribosomal subunit biogenesis                                                                                                                                                                   |
| LAMAP LAMAP2480_8042   | transcriptional regulatory protein YLR278C                                                                                                                                                                                                     |
| CBS2499v2 CBS2499_5034 | transcriptional regulatory protein YLR278C                                                                                                                                                                                                     |
| AWRIv2 AWRI_4186       | transcriptional regulatory protein YLR278C                                                                                                                                                                                                     |
| LAMAP LAMAP2480_8054   | CoA binding protein                                                                                                                                                                                                                            |
| CBS2499v2 CBS2499_0681 | protein 2                                                                                                                                                                                                                                      |
| AWRIv2 AWRI_0158       | protein 37                                                                                                                                                                                                                                     |
| LAMAP LAMAP2480_8057   | ADP-ribosylation factor GTPase-activating protein AGD5                                                                                                                                                                                         |
| CBS2499v2 CBS2499_0694 | ADP-ribosylation factor GTPase-activating protein AGD5                                                                                                                                                                                         |
| AWRIv2 AWRI_0146       | GTS1                                                                                                                                                                                                                                           |
| LAMAP LAMAP2480_8061   | <b>converts D-xylulose and ATP to xylulose 5-phosphate and ADP; rate limiting step in fermentation of xylulose; required for xylose fermentation by recombinant S. cerevisiae strains</b>                                                      |
| CBS2499v2 CBS2499_2856 | converts D-xylulose and ATP to xylulose 5-phosphate and ADP; rate limiting step in fermentation of xylulose; required for xylose fermentation by recombinant S. cerevisiae strains                                                             |
| AWRIv2 AWRI_2926       | converts D-xylulose and ATP to xylulose 5-phosphate and ADP; rate limiting step in fermentation of xylulose; required for xylose fermentation by recombinant S. cerevisiae strains                                                             |
| LAMAP LAMAP2480_8076   | protein sorting-associated protein 27                                                                                                                                                                                                          |
| CBS2499v2 CBS2499_3024 | protein sorting-associated protein 27                                                                                                                                                                                                          |
| AWRIv2 AWRI_1276       | protein sorting-associated protein 27                                                                                                                                                                                                          |
| LAMAP LAMAP2480_8097   | mismatch repair protein HSM3                                                                                                                                                                                                                   |
| CBS2499v2 CBS2499_2175 | mismatch repair protein HSM3                                                                                                                                                                                                                   |
| AWRIv2 AWRI_2874       | mismatch repair protein HSM3                                                                                                                                                                                                                   |
| LAMAP LAMAP2480_8103   | involved in cis-Golgi membrane traffic; v-SNARE that interacts with two t-SNARES, Sed5p and Pep12p; required for multiple vacuolar sorting pathways                                                                                            |
| CBS2499v2 CBS2499_2821 | involved in cis-Golgi membrane traffic; v-SNARE that interacts with two t-SNARES, Sed5p and Pep12p; required for multiple vacuolar sorting pathways                                                                                            |
| AWRIv2 AWRI_2764       | involved in cis-Golgi membrane traffic; v-SNARE that interacts with two t-SNARES, Sed5p and Pep12p; required for multiple vacuolar sorting pathways                                                                                            |
| LAMAP LAMAP2480_8106   | finger protein                                                                                                                                                                                                                                 |

|                        |                                                                                                                                                                                                                                                                            |
|------------------------|----------------------------------------------------------------------------------------------------------------------------------------------------------------------------------------------------------------------------------------------------------------------------|
| CBS2499v2 CBS2499_2817 | finger protein 264                                                                                                                                                                                                                                                         |
| AWRIv2 AWRI_2768       | finger protein 467                                                                                                                                                                                                                                                         |
| LAMAP LAMAP2480_8109   | protein 3 homolog                                                                                                                                                                                                                                                          |
| CBS2499v2 CBS2499_1049 | protein 3 homolog                                                                                                                                                                                                                                                          |
| AWRIv2 AWRI_0641       | site selection protein 6                                                                                                                                                                                                                                                   |
|                        |                                                                                                                                                                                                                                                                            |
| LAMAP LAMAP2480_8135   | <b>integral membrane protein required for efflux of amino acids during autophagic body breakdown in the vacuole; null mutation causes a gradual loss of viability during starvation</b>                                                                                    |
|                        |                                                                                                                                                                                                                                                                            |
| CBS2499v2 CBS2499_4691 | integral membrane protein required for efflux of amino acids; required for efflux of amino acids during autophagic body breakdown in the vacuole; null mutation causes a gradual loss of viability during starvation                                                       |
|                        |                                                                                                                                                                                                                                                                            |
| AWRIv2 AWRI_2407       | integral membrane protein required for efflux of amino acids; required for efflux of amino acids during autophagic body breakdown in the vacuole; null mutation causes a gradual loss of viability during starvation                                                       |
| LAMAP LAMAP2480_8161   | N-methyltransferase, H3 lysine-79 specific                                                                                                                                                                                                                                 |
| CBS2499v2 CBS2499_4363 | N-methyltransferase, H3 lysine-79 specific                                                                                                                                                                                                                                 |
| AWRIv2 AWRI_1187       | N-methyltransferase, H3 lysine-79 specific                                                                                                                                                                                                                                 |
| LAMAP LAMAP2480_8217   | family                                                                                                                                                                                                                                                                     |
| CBS2499v2 CBS2499_4132 | family                                                                                                                                                                                                                                                                     |
| AWRIv2 AWRI_3456       | exonuclease phosphatase family protein                                                                                                                                                                                                                                     |
| LAMAP LAMAP2480_8224   | arginine N-methyltransferase skb1                                                                                                                                                                                                                                          |
| CBS2499v2 CBS2499_3273 | arginine N-methyltransferase HSL7                                                                                                                                                                                                                                          |
| AWRIv2 AWRI_2336       | arginine N-methyltransferase HSL7                                                                                                                                                                                                                                          |
|                        |                                                                                                                                                                                                                                                                            |
| LAMAP LAMAP2480_8225   | of the cytosolic iron-sulfur (FeS) protein assembly machinery, required for maturation of cytosolic and nuclear FeS proteins and for normal resistance to oxidative stress; homologous to human Narf                                                                       |
|                        |                                                                                                                                                                                                                                                                            |
| CBS2499v2 CBS2499_0810 | of the cytosolic iron-sulfur (FeS) protein assembly machinery; required for maturation of cytosolic and nuclear FeS proteins and for normal resistance to oxidative stress; deficiency results in shortened lifespan and sensitivity to paraquat; homologous to human Narf |
| AWRIv2 AWRI_0052       | Fe-S cluster assembly factor NAR1                                                                                                                                                                                                                                          |
| LAMAP LAMAP2480_8238   | utilization protein A                                                                                                                                                                                                                                                      |
| CBS2499v2 CBS2499_2906 | utilization protein A                                                                                                                                                                                                                                                      |
| AWRIv2 AWRI_2979       | utilization protein A                                                                                                                                                                                                                                                      |
|                        |                                                                                                                                                                                                                                                                            |
| LAMAP LAMAP2480_8249   | protein subunit of the glycosylphosphatidylinositol transamidase complex that adds GPIs to newly synthesized proteins; human PIG-Tp homolog                                                                                                                                |
|                        |                                                                                                                                                                                                                                                                            |
| CBS2499v2 CBS2499_3032 | of the glycosylphosphatidylinositol transamidase complex; transmembrane protein; adds GPIs to newly synthesized proteins; human PIG-Tp homolog                                                                                                                             |
|                        |                                                                                                                                                                                                                                                                            |
| AWRIv2 AWRI_1270       | of the glycosylphosphatidylinositol transamidase complex; transmembrane protein; adds GPIs to newly synthesized proteins; human PIG-Tp homolog                                                                                                                             |
|                        |                                                                                                                                                                                                                                                                            |
| LAMAP LAMAP2480_8260   | that binds to Hsp82p and activates its ATPase activity; similar to Hch1p; expression is regulated by stresses such as heat shock                                                                                                                                           |
|                        |                                                                                                                                                                                                                                                                            |
| CBS2499v2 CBS2499_3836 | that binds Hsp82p and activates its ATPase activity; plays a role in determining prion variants; similar to Hch1p; expression is regulated by stresses such as heat shock; protein abundance increases in response to DNA replication stress                               |
| AWRIv2 AWRI_1825       | protein C1711.08                                                                                                                                                                                                                                                           |

|                        |                                                                                                                                                                                                                                                                                                                  |
|------------------------|------------------------------------------------------------------------------------------------------------------------------------------------------------------------------------------------------------------------------------------------------------------------------------------------------------------|
| LAMAP LAMAP2480_8266   | 9 superfamily member 3                                                                                                                                                                                                                                                                                           |
| CBS2499v2 CBS2499_3799 | 9 superfamily member 3                                                                                                                                                                                                                                                                                           |
| AWRIv2 AWRI_1108       | 9 superfamily member 3                                                                                                                                                                                                                                                                                           |
| LAMAP LAMAP2480_8267   | monooxygenase [N-oxide-forming] 2                                                                                                                                                                                                                                                                                |
| CBS2499v2 CBS2499_3796 | monooxygenase [N-oxide-forming] 2                                                                                                                                                                                                                                                                                |
| AWRIv2 AWRI_1111       | monooxygenase [N-oxide-forming] 2                                                                                                                                                                                                                                                                                |
| LAMAP LAMAP2480_8270   | complexes subunit NGG1                                                                                                                                                                                                                                                                                           |
| CBS2499v2 CBS2499_4377 | complexes subunit NGG1                                                                                                                                                                                                                                                                                           |
| AWRIv2 AWRI_4073       | complexes subunit NGG1                                                                                                                                                                                                                                                                                           |
| LAMAP LAMAP2480_8294   | regulator CRZ1                                                                                                                                                                                                                                                                                                   |
| CBS2499v2 CBS2499_2046 | regulator CRZ1                                                                                                                                                                                                                                                                                                   |
| AWRIv2 AWRI_0959       | regulator CRZ1                                                                                                                                                                                                                                                                                                   |
| LAMAP LAMAP2480_8296   | LDB17                                                                                                                                                                                                                                                                                                            |
| CBS2499v2 CBS2499_2798 | LDB17                                                                                                                                                                                                                                                                                                            |
| AWRIv2 AWRI_2789       | LDB17                                                                                                                                                                                                                                                                                                            |
|                        | cyclin involved in cell cycle progression; activates Cdc28p to promote the G2/M transition; may be involved in DNA replication and spindle assembly; accumulates during S phase and G2, then targeted for ubiquitin-mediated degradation                                                                         |
| LAMAP LAMAP2480_8300   |                                                                                                                                                                                                                                                                                                                  |
|                        | cyclin involved in cell cycle progression; activates Cdc28p to promote the G2/M transition; may be involved in DNA replication and spindle assembly; accumulates during S phase and G2, then targeted for ubiquitin-mediated degradation; CLB4 has a paralog, CLB3, that arose from the whole genome duplication |
| CBS2499v2 CBS2499_2715 |                                                                                                                                                                                                                                                                                                                  |
|                        | cyclin involved in cell cycle progression; activates Cdc28p to promote the G2/M transition; may be involved in DNA replication and spindle assembly; accumulates during S phase and G2, then targeted for ubiquitin-mediated degradation; CLB4 has a paralog, CLB3, that arose from the whole genome duplication |
| AWRIv2 AWRI_0400       |                                                                                                                                                                                                                                                                                                                  |
| LAMAP LAMAP2480_8308   | complex component SEC8                                                                                                                                                                                                                                                                                           |
| CBS2499v2 CBS2499_2947 | complex component SEC8                                                                                                                                                                                                                                                                                           |
| AWRIv2 AWRI_3798       | complex component SEC8                                                                                                                                                                                                                                                                                           |
|                        | <b>dehydrogenase, oxidizes D-lactate to pyruvate, transcription is heme-dependent, repressed by glucose, and derepressed in ethanol or lactate; located in the mitochondrial inner membrane</b>                                                                                                                  |
| LAMAP LAMAP2480_8309   | dehydrogenase; oxidizes D-lactate to pyruvate, transcription is heme-dependent, repressed by glucose, and derepressed in ethanol or lactate; located in the mitochondrial inner membrane                                                                                                                         |
| CBS2499v2 CBS2499_2948 | dehydrogenase; oxidizes D-lactate to pyruvate, transcription is heme-dependent, repressed by glucose, and derepressed in ethanol or lactate; located in the mitochondrial inner membrane                                                                                                                         |
| AWRIv2 AWRI_3797       | desaturase                                                                                                                                                                                                                                                                                                       |
| LAMAP LAMAP2480_8310   | fatty acid desaturase; required for monounsaturated fatty acid synthesis and for normal distribution of mitochondria                                                                                                                                                                                             |
| CBS2499v2 CBS2499_2949 | fatty acid desaturase; required for monounsaturated fatty acid synthesis and for normal distribution of mitochondria                                                                                                                                                                                             |
| AWRIv2 AWRI_3796       | membrane protein YLR326W                                                                                                                                                                                                                                                                                         |
| LAMAP LAMAP2480_8331   | membrane protein YLR326W                                                                                                                                                                                                                                                                                         |
| CBS2499v2 CBS2499_0799 | membrane protein YLR326W                                                                                                                                                                                                                                                                                         |
| AWRIv2 AWRI_0059       |                                                                                                                                                                                                                                                                                                                  |

|                        |                                                                                                                                                                                                                                                                                                                                                                                                                                                               |
|------------------------|---------------------------------------------------------------------------------------------------------------------------------------------------------------------------------------------------------------------------------------------------------------------------------------------------------------------------------------------------------------------------------------------------------------------------------------------------------------|
| LAMAP LAMAP2480_8363   | protein _2160                                                                                                                                                                                                                                                                                                                                                                                                                                                 |
| CBS2499v2 CBS2499_5103 | protein _2160                                                                                                                                                                                                                                                                                                                                                                                                                                                 |
| AWRIv2 AWRI_1806       | protein _2160                                                                                                                                                                                                                                                                                                                                                                                                                                                 |
| LAMAP LAMAP2480_8380   | <b>protein of unknown function, member of the multi-drug and toxin extrusion (MATE) family of the multidrug/oligosaccharidyl-lipid/polysaccharide (MOP) exporter superfamily</b>                                                                                                                                                                                                                                                                              |
| CBS2499v2 CBS2499_3025 | protein of unknown function; member of the multi-drug and toxin extrusion (MATE) family of the multidrug/oligosaccharidyl-lipid/polysaccharide (MOP) exporter superfamily                                                                                                                                                                                                                                                                                     |
| AWRIv2 AWRI_1275       | efflux family protein                                                                                                                                                                                                                                                                                                                                                                                                                                         |
| LAMAP LAMAP2480_8422   | repeat protein required for ubiquitin-mediated protein degradation, forms complex with Cdc48p, plays a role in controlling cellular ubiquitin concentration; also promotes efficient NHEJ in postdiauxic/stationary phase                                                                                                                                                                                                                                     |
| CBS2499v2 CBS2499_0407 | repeat protein required for ubiquitin-mediated protein degradation; forms a complex with Cdc48p; plays a role in controlling cellular ubiquitin concentration; also promotes efficient NHEJ in postdiauxic/stationary phase; facilitates N-terminus-dependent proteolysis of centromeric histone H3 (Cse4p) for faithful chromosome segregation; protein increases in abundance and relocalizes from nucleus to nuclear periphery upon DNA replication stress |
| AWRIv2 AWRI_3702       | DOA1                                                                                                                                                                                                                                                                                                                                                                                                                                                          |
| LAMAP LAMAP2480_8438   | <b>protein kinase; may play a role in stress response, many CA<sup>++</sup>/calmodulan dependent phosphorylation substrates demonstrated in vitro, amino acid sequence similar to Cmk1p and mammalian Cam Kinase II</b>                                                                                                                                                                                                                                       |
| CBS2499v2 CBS2499_0501 | protein kinase; may play a role in stress response, many CA <sup>++</sup> /calmodulan dependent phosphorylation substrates demonstrated in vitro, amino acid sequence similar to mammalian Cam Kinase II; CMK2 has a paralog, CMK1, that arose from the whole genome duplication                                                                                                                                                                              |
| AWRIv2 AWRI_3856       | protein kinase II                                                                                                                                                                                                                                                                                                                                                                                                                                             |
| LAMAP LAMAP2480_8470   | beta SMX1                                                                                                                                                                                                                                                                                                                                                                                                                                                     |
| CBS2499v2 CBS2499_4641 | beta SMX1                                                                                                                                                                                                                                                                                                                                                                                                                                                     |
| AWRIv2 AWRI_1734       | beta SMX1                                                                                                                                                                                                                                                                                                                                                                                                                                                     |
| LAMAP LAMAP2480_8487   | MSS2, mitochondrial                                                                                                                                                                                                                                                                                                                                                                                                                                           |
| CBS2499v2 CBS2499_1667 | MSS2, mitochondrial                                                                                                                                                                                                                                                                                                                                                                                                                                           |
| AWRIv2 AWRI_2177       | bound inner membrane protein of the mitochondrial matrix                                                                                                                                                                                                                                                                                                                                                                                                      |
| LAMAP LAMAP2480_8489   | protein PB17E12.11                                                                                                                                                                                                                                                                                                                                                                                                                                            |
| CBS2499v2 CBS2499_1669 | glycosyltransferase subunit 3                                                                                                                                                                                                                                                                                                                                                                                                                                 |
| AWRIv2 AWRI_2178       | dolichyl-diphosphooligosaccharide--protein glycosyltransferase subunit 3                                                                                                                                                                                                                                                                                                                                                                                      |
| LAMAP LAMAP2480_8497   | synthetase                                                                                                                                                                                                                                                                                                                                                                                                                                                    |
| CBS2499v2 CBS2499_1464 | synthetase                                                                                                                                                                                                                                                                                                                                                                                                                                                    |
| AWRIv2 AWRI_3764       | synthetase                                                                                                                                                                                                                                                                                                                                                                                                                                                    |
| LAMAP LAMAP2480_8505   | protein _2117                                                                                                                                                                                                                                                                                                                                                                                                                                                 |
| CBS2499v2 CBS2499_3655 | protein _2117                                                                                                                                                                                                                                                                                                                                                                                                                                                 |
| AWRIv2 AWRI_1778       | protein                                                                                                                                                                                                                                                                                                                                                                                                                                                       |
| LAMAP LAMAP2480_8513   | amidase C869.01                                                                                                                                                                                                                                                                                                                                                                                                                                               |
| CBS2499v2 CBS2499_5041 | amidase C869.01                                                                                                                                                                                                                                                                                                                                                                                                                                               |
| AWRIv2 AWRI_4194       | amidase C869.01                                                                                                                                                                                                                                                                                                                                                                                                                                               |
| LAMAP LAMAP2480_8535   | modification-related protein YNG2                                                                                                                                                                                                                                                                                                                                                                                                                             |

|                        |                                                                                                                                                                                                                                                                                                                                                                                                                                   |
|------------------------|-----------------------------------------------------------------------------------------------------------------------------------------------------------------------------------------------------------------------------------------------------------------------------------------------------------------------------------------------------------------------------------------------------------------------------------|
| CBS2499v2 CBS2499_3474 | modification-related protein YNG2                                                                                                                                                                                                                                                                                                                                                                                                 |
| AWRIv2 AWRI_4029       | modification-related protein png1                                                                                                                                                                                                                                                                                                                                                                                                 |
| LAMAP LAMAP2480_8547   | protein _4537                                                                                                                                                                                                                                                                                                                                                                                                                     |
| CBS2499v2 CBS2499_2945 | protein _4537                                                                                                                                                                                                                                                                                                                                                                                                                     |
| AWRIv2 AWRI_3800       | protein _4537                                                                                                                                                                                                                                                                                                                                                                                                                     |
| LAMAP LAMAP2480_8553   | threonine protein kinase                                                                                                                                                                                                                                                                                                                                                                                                          |
| CBS2499v2 CBS2499_3373 | kinase PKH2                                                                                                                                                                                                                                                                                                                                                                                                                       |
| AWRIv2 AWRI_4008       | kinase PKH2                                                                                                                                                                                                                                                                                                                                                                                                                       |
| LAMAP LAMAP2480_8595   | RING finger protein C6B12.07c                                                                                                                                                                                                                                                                                                                                                                                                     |
| CBS2499v2 CBS2499_0411 | RING finger protein C6B12.07c                                                                                                                                                                                                                                                                                                                                                                                                     |
| AWRIv2 AWRI_3699       | regulator of yeast form adherence 3                                                                                                                                                                                                                                                                                                                                                                                               |
| LAMAP LAMAP2480_8596   | enzyme E1                                                                                                                                                                                                                                                                                                                                                                                                                         |
| CBS2499v2 CBS2499_0412 | enzyme E1                                                                                                                                                                                                                                                                                                                                                                                                                         |
| AWRIv2 AWRI_3698       | enzyme E1                                                                                                                                                                                                                                                                                                                                                                                                                         |
| LAMAP LAMAP2480_8609   | <b>exo-1,3-beta-glucanase; contributes to ascospore thermoresistance</b>                                                                                                                                                                                                                                                                                                                                                          |
| CBS2499v2 CBS2499_1028 | exo-1,3-beta-glucanase; contributes to ascospore thermoresistance; SPR1 has a paralog, EXG1, that arose from the whole genome duplication                                                                                                                                                                                                                                                                                         |
| AWRIv2 AWRI_0662       | exo-1,3-beta-glucanase of the cell wall; involved in cell wall beta-glucan assembly; exists as three differentially glycosylated isoenzymes; EXG1 has a paralog, SPR1, that arose from the whole genome duplication                                                                                                                                                                                                               |
| LAMAP LAMAP2480_8631   | kinase par-1                                                                                                                                                                                                                                                                                                                                                                                                                      |
| CBS2499v2 CBS2499_2519 | kinase par-1                                                                                                                                                                                                                                                                                                                                                                                                                      |
| AWRIv2 AWRI_0542       | kinase MARK1                                                                                                                                                                                                                                                                                                                                                                                                                      |
| LAMAP LAMAP2480_8642   | synthetase, catalyzes the ATP-dependent synthesis of glutathione (GSH) from gamma-glutamylcysteine and glycine; induced by oxidative stress and heat shock                                                                                                                                                                                                                                                                        |
| CBS2499v2 CBS2499_1482 | synthetase; catalyzes the ATP-dependent synthesis of glutathione (GSH) from gamma-glutamylcysteine and glycine; induced by oxidative stress and heat shock                                                                                                                                                                                                                                                                        |
| AWRIv2 AWRI_3679       | synthetase; catalyzes the ATP-dependent synthesis of glutathione (GSH) from gamma-glutamylcysteine and glycine; induced by oxidative stress and heat shock                                                                                                                                                                                                                                                                        |
| LAMAP LAMAP2480_8656   | protein L4 of the large (60S) ribosomal subunit, nearly identical to Rpl8Ap and has similarity to rat L7a ribosomal protein; mutation results in decreased amounts of free 60S subunits                                                                                                                                                                                                                                           |
| CBS2499v2 CBS2499_0830 | 60S subunit protein L8B; required for processing of 27SA3 pre-rRNA to 27SB pre-rRNA during assembly of large ribosomal subunit; depletion leads to a turnover of pre-rRNA; L8 binds to Domain I of 25S and 5.8 S rRNAs; mutation results in decreased amounts of free 60S subunits; homologous to mammalian ribosomal protein L7A, no bacterial homolog; RPL8B has a paralog, RPL8A, that arose from the whole genome duplication |
| AWRIv2 AWRI_0034       | 60S subunit protein L8B; required for processing of 27SA3 pre-rRNA to 27SB pre-rRNA during assembly of large ribosomal subunit; depletion leads to a turnover of pre-rRNA; L8 binds to Domain I of 25S and 5.8 S rRNAs; mutation results in decreased amounts of free 60S subunits; homologous to mammalian ribosomal protein L7A, no bacterial homolog; RPL8B has a paralog, RPL8A, that arose from the whole genome duplication |
| LAMAP LAMAP2480_8658   | proliferation transcriptional regulator                                                                                                                                                                                                                                                                                                                                                                                           |
| CBS2499v2 CBS2499_1933 | resistance regulator 1                                                                                                                                                                                                                                                                                                                                                                                                            |
| AWRIv2 AWRI_1628       | resistance regulator 1                                                                                                                                                                                                                                                                                                                                                                                                            |

|                        |                                                                                                                                                                                                                                           |
|------------------------|-------------------------------------------------------------------------------------------------------------------------------------------------------------------------------------------------------------------------------------------|
| LAMAP LAMAP2480_8659   | protein                                                                                                                                                                                                                                   |
| CBS2499v2 CBS2499_1932 | protein                                                                                                                                                                                                                                   |
| AWRIv2 AWRI_1629       | protein                                                                                                                                                                                                                                   |
| LAMAP LAMAP2480_8683   | finger protein RME1                                                                                                                                                                                                                       |
| CBS2499v2 CBS2499_0813 | finger protein RME1                                                                                                                                                                                                                       |
| AWRIv2 AWRI_0051       | finger protein RME1                                                                                                                                                                                                                       |
|                        | <b>permease, localized to the plasma membrane; expression is tightly regulated by uracil levels and environmental cues</b>                                                                                                                |
| LAMAP LAMAP2480_8695   | membrane localized uracil permease; expression is tightly regulated by uracil levels and environmental cues; conformational alterations induced by unfolding or substrate binding result in Rsp5p-mediated ubiquitination and degradation |
|                        | membrane localized uracil permease; expression is tightly regulated by uracil levels and environmental cues; conformational alterations induced by unfolding or substrate binding result in Rsp5p-mediated ubiquitination and degradation |
| CBS2499v2 CBS2499_3453 |                                                                                                                                                                                                                                           |
|                        |                                                                                                                                                                                                                                           |
| AWRIv2 AWRI_3348       | protein HPODL_04242                                                                                                                                                                                                                       |
| LAMAP LAMAP2480_8704   | protein HPODL_04242                                                                                                                                                                                                                       |
| CBS2499v2 CBS2499_0597 | protein HPODL_04242                                                                                                                                                                                                                       |
| AWRIv2 AWRI_3438       | S-methyltransferase 1                                                                                                                                                                                                                     |
| LAMAP LAMAP2480_8712   | S-methyltransferase 1                                                                                                                                                                                                                     |
| CBS2499v2 CBS2499_2696 | S-methyltransferase                                                                                                                                                                                                                       |
| AWRIv2 AWRI_0420       | transduction protein MDG1                                                                                                                                                                                                                 |
| LAMAP LAMAP2480_8767   | transduction protein MDG1                                                                                                                                                                                                                 |
| CBS2499v2 CBS2499_1256 | protein                                                                                                                                                                                                                                   |
| AWRIv2 AWRI_1688       | mannosyltransferase KTR5                                                                                                                                                                                                                  |
| LAMAP LAMAP2480_8791   |                                                                                                                                                                                                                                           |
|                        |                                                                                                                                                                                                                                           |
| CBS2499v2 CBS2499_2818 | mannosyltransferase involved in protein glycosylation; member of the KRE2/MNT1 mannosyltransferase family; KTR5 has a paralog, KTR7, that arose from the whole genome duplication                                                         |
|                        |                                                                                                                                                                                                                                           |
|                        |                                                                                                                                                                                                                                           |
| AWRIv2 AWRI_2767       | mannosyltransferase involved in protein glycosylation; member of the KRE2/MNT1 mannosyltransferase family; KTR5 has a paralog, KTR7, that arose from the whole genome duplication                                                         |
| LAMAP LAMAP2480_8803   | MRP/P 32.9 kDa subunit                                                                                                                                                                                                                    |
| CBS2499v2 CBS2499_1032 | MRP/P 32.9 kDa subunit                                                                                                                                                                                                                    |
| AWRIv2 AWRI_0657       | rn mrp complex component                                                                                                                                                                                                                  |
| LAMAP LAMAP2480_8813   | transport protein Sec61 subunit beta                                                                                                                                                                                                      |
| CBS2499v2 CBS2499_2814 | transport protein Sec61 subunit beta                                                                                                                                                                                                      |
| AWRIv2 AWRI_2772       | transport protein Sec61 subunit beta                                                                                                                                                                                                      |
| LAMAP LAMAP2480_8827   | resolvase Ydc2 / RNA splicing MRS1                                                                                                                                                                                                        |
| CBS2499v2 CBS2499_4827 | resolvase Ydc2 / RNA splicing MRS1                                                                                                                                                                                                        |
| AWRIv2 AWRI_3400       | resolvase Ydc2 / RNA splicing MRS1                                                                                                                                                                                                        |
| LAMAP LAMAP2480_8832   | protein C691.05c                                                                                                                                                                                                                          |
| CBS2499v2 CBS2499_3656 | protein C691.05c                                                                                                                                                                                                                          |
| AWRIv2 AWRI_1779       | protein C691.05c                                                                                                                                                                                                                          |
| LAMAP LAMAP2480_8844   | protein _1889                                                                                                                                                                                                                             |
| CBS2499v2 CBS2499_1965 | protein _1889                                                                                                                                                                                                                             |

|                        |                                                                                                                                                                                                  |
|------------------------|--------------------------------------------------------------------------------------------------------------------------------------------------------------------------------------------------|
| AWRIv2 AWRI_1605       | protein _1889                                                                                                                                                                                    |
| LAMAP LAMAP2480_8926   | protein HPODL_04743                                                                                                                                                                              |
| CBS2499v2 CBS2499_2951 | protein HPODL_04743                                                                                                                                                                              |
| AWRIv2 AWRI_3794       | protein HPODL_04743                                                                                                                                                                              |
| LAMAP LAMAP2480_8927   | atpase v1 domain subunit g                                                                                                                                                                       |
| CBS2499v2 CBS2499_2950 | ATPase, G subunit                                                                                                                                                                                |
| AWRIv2 AWRI_3795       | proton ATPase subunit G                                                                                                                                                                          |
| LAMAP LAMAP2480_8934   | protein HPODL_04360                                                                                                                                                                              |
| CBS2499v2 CBS2499_4129 | protein HPODL_04360                                                                                                                                                                              |
| AWRIv2 AWRI_3453       | beta- -n- contains wsc domain-containing protein                                                                                                                                                 |
| LAMAP LAMAP2480_8950   | decarboxylase, catalyzes decarboxylation of phenylpyruvate to phenylacetaldehyde, which is the first specific step in the Ehrlich pathway                                                        |
| CBS2499v2 CBS2499_3061 | decarboxylase; catalyzes decarboxylation of phenylpyruvate to phenylacetaldehyde, which is the first specific step in the Ehrlich pathway; involved in protein N-terminal Met and Ala catabolism |
| AWRIv2 AWRI_1241       | decarboxylase; catalyzes decarboxylation of phenylpyruvate to phenylacetaldehyde, which is the first specific step in the Ehrlich pathway; involved in protein N-terminal Met and Ala catabolism |
| LAMAP LAMAP2480_9015   | protein particle complex subunit 6B                                                                                                                                                              |
| CBS2499v2 CBS2499_1145 | protein particle complex subunit 6B                                                                                                                                                              |
| AWRIv2 AWRI_2468       | protein particle complex subunit 6A                                                                                                                                                              |
| LAMAP LAMAP2480_9038   | 2-dehydropantoate 2-reductase                                                                                                                                                                    |
| CBS2499v2 CBS2499_1768 | 2-dehydropantoate 2-reductase                                                                                                                                                                    |
| AWRIv2 AWRI_1456       | 2-reductase                                                                                                                                                                                      |
| LAMAP LAMAP2480_9042   | MGA2                                                                                                                                                                                             |
| CBS2499v2 CBS2499_3200 | MGA2                                                                                                                                                                                             |
| AWRIv2 AWRI_1919       | SPT23                                                                                                                                                                                            |
| LAMAP LAMAP2480_9065   | <b>resistance MFS transporter, drug:H<sup>+</sup> antiporter-2 (14 Spanner) (DHA2) family</b>                                                                                                    |
| CBS2499v2 CBS2499_4596 | resistance MFS transporter, drug:H <sup>+</sup> antiporter-2 (14 Spanner) (DHA2) family                                                                                                          |
| AWRIv2 AWRI_1096       | resistance MFS transporter, drug:H <sup>+</sup> antiporter-2 (14 Spanner) (DHA2) family                                                                                                          |
| LAMAP LAMAP2480_9083   | and RING finger domain-containing protein C126.07c                                                                                                                                               |
| CBS2499v2 CBS2499_3397 | protein 36                                                                                                                                                                                       |
| AWRIv2 AWRI_3491       | protein 36                                                                                                                                                                                       |
| LAMAP LAMAP2480_9100   | <b>transporter, sugar porter (SP) family</b>                                                                                                                                                     |
| CBS2499v2 CBS2499_4900 | transporter, sugar porter (SP) family                                                                                                                                                            |
| AWRIv2 AWRI_3974       | transporter, sugar porter (SP) family                                                                                                                                                            |
| LAMAP LAMAP2480_9105   | protein _3449                                                                                                                                                                                    |
| CBS2499v2 CBS2499_1589 | protein _3449                                                                                                                                                                                    |
| AWRIv2 AWRI_2869       | protein _3449                                                                                                                                                                                    |
| LAMAP LAMAP2480_9116   | N-acetyltransferase 1                                                                                                                                                                            |
| CBS2499v2 CBS2499_1013 | N-acetyltransferase 1                                                                                                                                                                            |
| AWRIv2 AWRI_0672       | N-acetyltransferase 1                                                                                                                                                                            |
| LAMAP LAMAP2480_9120   | ribosomal protein L3, mitochondrial                                                                                                                                                              |

CBS2499v2|CBS2499\_2886

AWRIv2|AWRI\_2956  
LAMAP|LAMAP2480\_9123  
CBS2499v2|CBS2499\_4684  
AWRIv2|AWRI\_4196  
LAMAP|LAMAP2480\_9167  
CBS2499v2|CBS2499\_3023  
AWRIv2|AWRI\_1277  
LAMAP|LAMAP2480\_9172  
CBS2499v2|CBS2499\_4996  
AWRIv2|AWRI\_1477  
LAMAP|LAMAP2480\_9174  
CBS2499v2|CBS2499\_1991  
AWRIv2|AWRI\_1580  
LAMAP|LAMAP2480\_9178  
CBS2499v2|CBS2499\_2500  
AWRIv2|AWRI\_0527  
LAMAP|LAMAP2480\_9182  
CBS2499v2|CBS2499\_3883  
AWRIv2|AWRI\_1875

LAMAP|LAMAP2480\_9187

CBS2499v2|CBS2499\_2269  
AWRIv2|AWRI\_2855  
LAMAP|LAMAP2480\_9221  
CBS2499v2|CBS2499\_3421  
AWRIv2|AWRI\_3378  
LAMAP|LAMAP2480\_9223  
CBS2499v2|CBS2499\_1149  
AWRIv2|AWRI\_2465  
LAMAP|LAMAP2480\_9249  
CBS2499v2|CBS2499\_1216  
AWRIv2|AWRI\_2548  
LAMAP|LAMAP2480\_9258  
CBS2499v2|CBS2499\_3422

ribosomal protein of the large subunit; located in close proximity to the polypeptide exit channel of the ribosome; mutations in human homolog MRPL44 cause childhood cardiomyopathy; human MRPL44 deficiency results in inefficient assembly of the mitochondrial ribosome, and in tissue-specific respiratory chain deficiency, manifesting as either Complex I+Complex IV or Complex IV deficiency, depending on a cell type

ribosomal protein of the large subunit; located in close proximity to the polypeptide exit channel of the ribosome; mutations in human homolog MRPL44 cause childhood cardiomyopathy; human MRPL44 deficiency results in inefficient assembly of the mitochondrial ribosome, and in tissue-specific respiratory chain deficiency, manifesting as either Complex I+Complex IV or Complex IV deficiency, depending on a cell type

**MFS-type transporter C1271.10c**

MFS-type transporter C1271.10c

MFS-type transporter C1271.10c

exchange factor SIL1

exchange factor SIL1

exchange factor SIL1

KRI1 homolog

kri1

KRI1

export protein BRR6

export protein BRR6

export protein BRR6

protein SEC72

protein SEC72

protein SEC72

protein \_2243

protein \_2243

protein \_2243

oxidase, converts spermine to spermidine, which is required for the essential hypusination modification of translation factor eIF-5A; also involved in pantothenic acid biosynthesis

oxidase; converts spermine to spermidine, which is required for the essential hypusination modification of translation factor eIF-5A; also involved in pantothenic acid biosynthesis

protein

transport protein SEC9

transport protein SEC9

transport protein SEC9

IVY1

IVY1

IVY1

protein \_3065

protein \_3065

protein \_3065

repeat-containing protein LWD1

repeat-containing protein YPL247C

AWRIv2|AWRI\_3377

LAMAP|LAMAP2480\_9273

CBS2499v2|CBS2499\_3258

AWRIv2|AWRI\_2352

LAMAP|LAMAP2480\_9277

CBS2499v2|CBS2499\_2604

AWRIv2|AWRI\_3953

LAMAP|LAMAP2480\_9321

CBS2499v2|CBS2499\_4219

AWRIv2|AWRI\_3052

LAMAP|LAMAP2480\_9334

CBS2499v2|CBS2499\_4894

AWRIv2|AWRI\_3968

LAMAP|LAMAP2480\_9341

CBS2499v2|CBS2499\_2943

AWRIv2|AWRI\_3018

LAMAP|LAMAP2480\_9360

CBS2499v2|CBS2499\_2813

AWRIv2|AWRI\_2773

LAMAP|LAMAP2480\_9387

CBS2499v2|CBS2499\_3043

AWRIv2|AWRI\_1257

LAMAP|LAMAP2480\_9397

CBS2499v2|CBS2499\_3798

AWRIv2|AWRI\_1109

LAMAP|LAMAP2480\_9427

CBS2499v2|CBS2499\_2212

AWRIv2|AWRI\_2821

LAMAP|LAMAP2480\_9435

CBS2499v2|CBS2499\_0835

AWRIv2|AWRI\_0029

LAMAP|LAMAP2480\_9455

CBS2499v2|CBS2499\_3037

AWRIv2|AWRI\_1265

LAMAP|LAMAP2480\_9513

CBS2499v2|CBS2499\_0933

and CUL4-associated factor 7

RNA helicase, component of the mitochondrial degradosome along with the RNase Dss1p; the degradosome associates with the ribosome and mediates RNA turnover; also required during splicing of the COX1 AI5\_beta intron

RNA helicase; component of the mitochondrial degradosome along with the RNase Dss1p; the degradosome associates with the ribosome and mediates RNA turnover; also required during splicing of the COX1 AI5\_beta intron

RNA helicase; component of the mitochondrial degradosome along with the RNase Dss1p; the degradosome associates with the ribosome and mediates RNA turnover; also required during splicing of the COX1 AI5\_beta intron

protein \_4704

protein \_4704

protein \_4704

protein \_3652

protein \_3652

protein \_3652

**MFS-type transporter C947.06c**

MFS-type transporter C947.06c

MFS-type transporter C947.06c

actin-related protein involved in chromatin remodeling, component of chromatin-remodeling enzyme complexes

actin-related protein involved in chromatin remodeling; component of chromatin-remodeling enzyme complexes

protein 4

protein PIN4

protein PIN4

protein PIN4

suppression protein

suppression protein

factor

phosphatase-like protein OCA2

phosphatase-like protein OCA2

phosphatase-like protein OCA2

thioesterase 1

thioesterase 1

thioesterase-dolichyl pyrophosphate phosphatase fusion 1

protein HPODL\_02291

protein HPODL\_02291

protein HPODL\_02291

polymerase-associated protein LEO1

polymerase-associated protein LEO1

polymerase-associated protein LEO1

binding protein

protein HPODL\_02920

|                        |                                                                                                                                                                                                                                                                                                                                                                                 |
|------------------------|---------------------------------------------------------------------------------------------------------------------------------------------------------------------------------------------------------------------------------------------------------------------------------------------------------------------------------------------------------------------------------|
| AWRIv2 AWRI_2494       | binding protein                                                                                                                                                                                                                                                                                                                                                                 |
| LAMAP LAMAP2480_9529   | decarboxylase/phosphopantothenate--cysteine ligase                                                                                                                                                                                                                                                                                                                              |
| CBS2499v2 CBS2499_3410 | decarboxylase/phosphopantothenate--cysteine ligase                                                                                                                                                                                                                                                                                                                              |
| AWRIv2 AWRI_3506       | decarboxylase/phosphopantothenate--cysteine ligase                                                                                                                                                                                                                                                                                                                              |
| LAMAP LAMAP2480_9549   | secreted protein                                                                                                                                                                                                                                                                                                                                                                |
| CBS2499v2 CBS2499_0821 | secreted protein                                                                                                                                                                                                                                                                                                                                                                |
| AWRIv2 AWRI_0045       | protein                                                                                                                                                                                                                                                                                                                                                                         |
| LAMAP LAMAP2480_9566   | maintenance of chromosomes protein 3                                                                                                                                                                                                                                                                                                                                            |
|                        | of the multiprotein cohesin complex; required for sister chromatid cohesion in mitotic cells; also required, with Rec8p, for cohesion and recombination during meiosis; phylogenetically conserved SMC chromosomal                                                                                                                                                              |
| CBS2499v2 CBS2499_4036 | ATPase family member                                                                                                                                                                                                                                                                                                                                                            |
| AWRIv2 AWRI_0309       | segregation protein sudA                                                                                                                                                                                                                                                                                                                                                        |
|                        | NADPH oxidoreductase containing flavin mononucleotide (FMN), homologous to Oye3p with different ligand binding and catalytic properties; may be involved in sterol metabolism, oxidative stress response, and programmed cell death                                                                                                                                             |
| LAMAP LAMAP2480_9577   | NADPH oxidoreductase containing flavin mononucleotide (FMN); responsible for geraniol reduction into citronellol during fermentation; homologous to Oye3p with different ligand binding and catalytic properties; may be involved in sterol metabolism, oxidative stress response, and programmed cell death; protein abundance increases in response to DNA replication stress |
| CBS2499v2 CBS2499_4679 | NADPH oxidoreductase containing flavin mononucleotide (FMN); responsible for geraniol reduction into citronellol during fermentation; homologous to Oye3p with different ligand binding and catalytic properties; may be involved in sterol metabolism, oxidative stress response, and programmed cell death; protein abundance increases in response to DNA replication stress |
| AWRIv2 AWRI_3177       | repeat-containing protein 26                                                                                                                                                                                                                                                                                                                                                    |
| LAMAP LAMAP2480_9583   | degradation protein 7                                                                                                                                                                                                                                                                                                                                                           |
| CBS2499v2 CBS2499_4690 | WD repeat-containing protein C343.04c                                                                                                                                                                                                                                                                                                                                           |
| AWRIv2 AWRI_2408       | pore complex subunit                                                                                                                                                                                                                                                                                                                                                            |
| LAMAP LAMAP2480_9601   | pore complex subunit                                                                                                                                                                                                                                                                                                                                                            |
| CBS2499v2 CBS2499_3412 | pore complex subunit                                                                                                                                                                                                                                                                                                                                                            |
| AWRIv2 AWRI_3508       | protein sorting-associated protein 17                                                                                                                                                                                                                                                                                                                                           |
| LAMAP LAMAP2480_9606   | protein sorting-associated protein 17                                                                                                                                                                                                                                                                                                                                           |
| CBS2499v2 CBS2499_2343 | protein sorting-associated protein 17                                                                                                                                                                                                                                                                                                                                           |
| AWRIv2 AWRI_1353       | protein PB24D3.06c                                                                                                                                                                                                                                                                                                                                                              |
| LAMAP LAMAP2480_9612   | protein PB24D3.06c                                                                                                                                                                                                                                                                                                                                                              |
| CBS2499v2 CBS2499_3476 | protein PB24D3.06c                                                                                                                                                                                                                                                                                                                                                              |
| AWRIv2 AWRI_4031       | protein YEL023C                                                                                                                                                                                                                                                                                                                                                                 |
| LAMAP LAMAP2480_9630   | protein YEL023C                                                                                                                                                                                                                                                                                                                                                                 |
| CBS2499v2 CBS2499_4995 | protein YEL023C                                                                                                                                                                                                                                                                                                                                                                 |
| AWRIv2 AWRI_1476       | <b>transporter PTR2</b>                                                                                                                                                                                                                                                                                                                                                         |
| LAMAP LAMAP2480_9676   | transporter PTR2                                                                                                                                                                                                                                                                                                                                                                |
| CBS2499v2 CBS2499_2913 | transporter PTR2                                                                                                                                                                                                                                                                                                                                                                |
| AWRIv2 AWRI_2988       | protein _0110                                                                                                                                                                                                                                                                                                                                                                   |
| LAMAP LAMAP2480_9681   | protein _0110                                                                                                                                                                                                                                                                                                                                                                   |
| CBS2499v2 CBS2499_0758 | protein                                                                                                                                                                                                                                                                                                                                                                         |
| AWRIv2 AWRI_0093       |                                                                                                                                                                                                                                                                                                                                                                                 |

LAMAP|LAMAP2480\_9797

CBS2499v2|CBS2499\_3380

AWRIv2|AWRI\_4001

LAMAP|LAMAP2480\_9803

CBS2499v2|CBS2499\_1851

AWRIv2|AWRI\_2283

LAMAP|LAMAP2480\_9807

CBS2499v2|CBS2499\_4020

AWRIv2|AWRI\_0299

LAMAP|LAMAP2480\_9822

CBS2499v2|CBS2499\_4019

AWRIv2|AWRI\_0298

LAMAP|LAMAP2480\_9845

CBS2499v2|CBS2499\_0633

AWRIv2|AWRI\_3633

LAMAP|LAMAP2480\_9883

CBS2499v2|CBS2499\_2954

AWRIv2|AWRI\_3791

LAMAP|LAMAP2480\_9906

CBS2499v2|CBS2499\_2805

AWRIv2|AWRI\_2781

LAMAP|LAMAP2480\_9909

CBS2499v2|CBS2499\_4015

AWRIv2|AWRI\_0296

LAMAP|LAMAP2480\_9943

CBS2499v2|CBS2499\_3148

AWRIv2|AWRI\_3546

LAMAP|LAMAP2480\_9999

CBS2499v2|CBS2499\_2079

AWRIv2|AWRI\_0925

LAMAP|LAMAP2480\_10006

CBS2499v2|CBS2499\_3203

AWRIv2|AWRI\_1923

LAMAP|LAMAP2480\_10012

CBS2499v2|CBS2499\_2879

AWRIv2|AWRI\_2948

LAMAP|LAMAP2480\_10061

**amino acid permease, may act to supply the cell with amino acids as nitrogen source in nitrogen-poor conditions; transcription is induced under conditions of sulfur limitation; plays a role in regulating Ty1 transposition**

amino acid permease; may act to supply the cell with amino acids as nitrogen source in nitrogen-poor conditions; transcription is induced under conditions of sulfur limitation; plays a role in regulating Ty1 transposition

amino acid permease; may act to supply the cell with amino acids as nitrogen source in nitrogen-poor conditions; transcription is induced under conditions of sulfur limitation; plays a role in regulating Ty1 transposition

protein \_2735

protein JL09\_g3762

protein \_2735

fatty acid ethyl ester synthase/esterase 2

fatty acid ethyl ester synthase/esterase 2

fatty acid ethyl ester synthase/esterase 1

transporter required for normal sporulation; phosphorylated in mitochondria

transporter required for normal sporulation; phosphorylated in mitochondria; ADY2 has a paralog, ATO2, that arose from the whole genome duplication

transport outward protein 2

**membrane protein PEX13**

membrane protein PEX13

membrane protein PEX13

regulator protein palF/RIM8

regulator protein palF/RIM8

regulator protein palF/RIM8

ribosomal protein of the small subunit

ribosomal protein of the small subunit

ribosomal protein of the small subunit

protein \_4245

protein \_4245

protein \_4245

protein YBR271W

N-methyltransferase EFM2

N-methyltransferase EFM2

**transporter ESBP6**

transporter ESBP6

transporter ESBP6

protein \_3533

protein \_3533

protein \_3533

factor, CC1-like family

CBS2499v2|CBS2499\_0736  
AWRIv2|AWRI\_0105  
LAMAP|LAMAP2480\_10082  
CBS2499v2|CBS2499\_2937  
AWRIv2|AWRI\_3010  
LAMAP|LAMAP2480\_10085  
CBS2499v2|CBS2499\_1595  
AWRIv2|AWRI\_3612  
LAMAP|LAMAP2480\_10145  
CBS2499v2|CBS2499\_4250  
AWRIv2|AWRI\_1523  
LAMAP|LAMAP2480\_10163  
CBS2499v2|CBS2499\_1584  
AWRIv2|AWRI\_2860  
LAMAP|LAMAP2480\_10165  
CBS2499v2|CBS2499\_3415  
AWRIv2|AWRI\_3384  
LAMAP|LAMAP2480\_10264  
CBS2499v2|CBS2499\_2631  
AWRIv2|AWRI\_0484  
LAMAP|LAMAP2480\_10338  
CBS2499v2|CBS2499\_0717  
AWRIv2|AWRI\_0122  
LAMAP|LAMAP2480\_10354  
CBS2499v2|CBS2499\_4592  
AWRIv2|AWRI\_1094  
  
LAMAP|LAMAP2480\_10358  
  
CBS2499v2|CBS2499\_4354  
  
AWRIv2|AWRI\_2582  
LAMAP|LAMAP2480\_10376  
CBS2499v2|CBS2499\_1504  
AWRIv2|AWRI\_3693  
LAMAP|LAMAP2480\_10381  
CBS2499v2|CBS2499\_2811  
AWRIv2|AWRI\_2775  
LAMAP|LAMAP2480\_10435  
CBS2499v2|CBS2499\_2941  
AWRIv2|AWRI\_3015  
LAMAP|LAMAP2480\_10452  
CBS2499v2|CBS2499\_3344  
AWRIv2|AWRI\_0193

factor, CC1-like family  
HRB1  
**MFS-type transporter C3E7.06c**  
resistance MFS transporter, drug:H<sup>+</sup> antiporter-2 (14 Spanner) (DHA2) family  
resistance protein fnx1  
domain-containing protein C19F8.03c  
domain-containing protein C19F8.03c  
domain-containing protein C19F8.03c  
protein  
protein \_1801  
protein \_1801  
ribonuclease POP2  
ribonuclease POP2  
ribonuclease POP2  
protein \_4061  
protein \_4061  
protein \_4061  
biogenesis  
biogenesis  
biogenesis  
enzyme E2-34 kDa  
enzyme E2-34 kDa  
enzyme E2-34 kDa  
acetate-hydrolyzing esterase  
acetate-hydrolyzing esterase  
acetate-hydrolyzing esterase  
acetate-hydrolyzing esterase, required in balance with alcohol acetyltransferase to maintain optimal amounts  
of isoamyl acetate, which is particularly important in sake brewing  
acetate-hydrolyzing esterase; required in balance with alcohol acetyltransferase to maintain optimal amounts  
of isoamyl acetate, which is particularly important in sake brewing  
acetate-hydrolyzing esterase; required in balance with alcohol acetyltransferase to maintain optimal amounts  
of isoamyl acetate, which is particularly important in sake brewing  
phosphatase, phosphatase domain  
acid phosphatase  
acid phosphatase  
repair protein rad21  
subunit rad21  
subunit rad21  
N-lysine methyltransferase 3  
protein C16C6.01c  
protein  
protein \_0236  
protein MIG1  
protein \_0236

|                        |                                                                                                                                                                                                                                  |
|------------------------|----------------------------------------------------------------------------------------------------------------------------------------------------------------------------------------------------------------------------------|
| LAMAP LAMAP2480_10465  | RNA-processing protein 14                                                                                                                                                                                                        |
| CBS2499v2 CBS2499_2732 | RNA-processing protein 14                                                                                                                                                                                                        |
| AWRIv2 AWRI_0382       | of pre-ribosomal ribosomal biogenesis                                                                                                                                                                                            |
| LAMAP LAMAP2480_10475  | protein HPODL_03882                                                                                                                                                                                                              |
| CBS2499v2 CBS2499_3555 | protein HPODL_03882                                                                                                                                                                                                              |
| AWRIv2 AWRI_3902       | protein _4647                                                                                                                                                                                                                    |
|                        | protein of unknown function; sequence similarity to bacterial and human gluconokinase; green fluorescent protein (GFP)-fusion protein localizes to the cytoplasm; upregulated by deletion of the RNAP-II associated factor, PAF1 |
| LAMAP LAMAP2480_10482  |                                                                                                                                                                                                                                  |
| CBS2499v2 CBS2499_3249 | gluconokinase; sequence similarity to bacterial and human gluconokinase; green fluorescent protein (GFP)-fusion protein localizes to the cytoplasm; upregulated by deletion of the RNAP-II associated factor, PAF1               |
|                        |                                                                                                                                                                                                                                  |
| AWRIv2 AWRI_2358       | gluconokinase; sequence similarity to bacterial and human gluconokinase; green fluorescent protein (GFP)-fusion protein localizes to the cytoplasm; upregulated by deletion of the RNAP-II associated factor, PAF1               |
| LAMAP LAMAP2480_10525  | to glucose repression protein 1                                                                                                                                                                                                  |
| CBS2499v2 CBS2499_2453 | to glucose repression protein 1                                                                                                                                                                                                  |
| AWRIv2 AWRI_0506       | protein _0604                                                                                                                                                                                                                    |
| LAMAP LAMAP2480_10536  | URE2                                                                                                                                                                                                                             |
| CBS2499v2 CBS2499_2916 | S-transferase 1                                                                                                                                                                                                                  |
| AWRIv2 AWRI_2994       | S-transferase 1                                                                                                                                                                                                                  |
| LAMAP LAMAP2480_10581  | protein PIG2                                                                                                                                                                                                                     |
| CBS2499v2 CBS2499_2692 | phosphatase 1 regulatory subunit 3C                                                                                                                                                                                              |
| AWRIv2 AWRI_0424       | phosphatase 1 regulatory subunit 3C                                                                                                                                                                                              |
| LAMAP LAMAP2480_10613  | initiation factor IIA large subunit                                                                                                                                                                                              |
| CBS2499v2 CBS2499_0445 | initiation factor IIA large subunit                                                                                                                                                                                              |
| AWRIv2 AWRI_3920       | initiation factor IIA large subunit                                                                                                                                                                                              |
| LAMAP LAMAP2480_10671  | methyltransferase EFM1                                                                                                                                                                                                           |
|                        | methyltransferase; involved in the monomethylation of eEF1A (Tef1p/Tef2p); SET-domain family member; predicted involvement in ribosome biogenesis; green fluorescent protein (GFP)-fusion protein localizes to the cytoplasm     |
| CBS2499v2 CBS2499_3582 | N-methyltransferase EFM1                                                                                                                                                                                                         |
| AWRIv2 AWRI_4153       | phosphatase regulatory subunit                                                                                                                                                                                                   |
| LAMAP LAMAP2480_10700  | phosphatase 1 regulatory subunit 3C                                                                                                                                                                                              |
| CBS2499v2 CBS2499_4078 | phosphatase 1 regulatory subunit 3C                                                                                                                                                                                              |
| AWRIv2 AWRI_2726       | phosphatase 1 regulatory subunit 3C                                                                                                                                                                                              |
| LAMAP LAMAP2480_10719  | of the Golgi involved in protein mannosylation                                                                                                                                                                                   |
| CBS2499v2 CBS2499_2623 | 2-alpha-mannosyltransferase 2                                                                                                                                                                                                    |
| AWRIv2 AWRI_0492       | 2-alpha-mannosyltransferase 2                                                                                                                                                                                                    |
| LAMAP LAMAP2480_10745  | protein                                                                                                                                                                                                                          |
| CBS2499v2 CBS2499_4039 | protein                                                                                                                                                                                                                          |
| AWRIv2 AWRI_0314       | protein                                                                                                                                                                                                                          |
| LAMAP LAMAP2480_10774  | regulatory protein SDS3                                                                                                                                                                                                          |
| CBS2499v2 CBS2499_0634 | regulatory protein SDS3                                                                                                                                                                                                          |
| AWRIv2 AWRI_3634       | of defective silencing                                                                                                                                                                                                           |

|                        |                                                                                                                                                                                                                                                                                                                                        |
|------------------------|----------------------------------------------------------------------------------------------------------------------------------------------------------------------------------------------------------------------------------------------------------------------------------------------------------------------------------------|
| LAMAP LAMAP2480_10791  | domain                                                                                                                                                                                                                                                                                                                                 |
| CBS2499v2 CBS2499_2643 | protein _0569                                                                                                                                                                                                                                                                                                                          |
| AWRIv2 AWRI_0472       | protein _0569                                                                                                                                                                                                                                                                                                                          |
| LAMAP LAMAP2480_10799  | protein of unknown function                                                                                                                                                                                                                                                                                                            |
|                        | membrane protein kinase; negatively regulates membrane fusion; associates with vacuolar membrane through palmitoylation of one or more cysteines in consensus sequence; vacuolar membrane association is essential to its kinase activity; mutant shows defect in CPY processing; ortholog of human serine/threonine kinase 16 (STK16) |
| CBS2499v2 CBS2499_1627 | kinase ENV7                                                                                                                                                                                                                                                                                                                            |
| AWRIv2 AWRI_2143       | glutamine amidotransferase YLR126C                                                                                                                                                                                                                                                                                                     |
| LAMAP LAMAP2480_10880  | glutamine amidotransferase-like protein C13C5.04                                                                                                                                                                                                                                                                                       |
| CBS2499v2 CBS2499_2934 | glutamine amidotransferase YLR126C                                                                                                                                                                                                                                                                                                     |
| AWRIv2 AWRI_3007       | carrier protein                                                                                                                                                                                                                                                                                                                        |
| LAMAP LAMAP2480_10901  | carrier protein                                                                                                                                                                                                                                                                                                                        |
| CBS2499v2 CBS2499_1542 | carrier protein                                                                                                                                                                                                                                                                                                                        |
| AWRIv2 AWRI_2665       | protein _0517                                                                                                                                                                                                                                                                                                                          |
| LAMAP LAMAP2480_11053  | protein _0517                                                                                                                                                                                                                                                                                                                          |
| CBS2499v2 CBS2499_2691 | protein _0517                                                                                                                                                                                                                                                                                                                          |
| AWRIv2 AWRI_0426       | protein 16                                                                                                                                                                                                                                                                                                                             |
| LAMAP LAMAP2480_11096  | protein 16                                                                                                                                                                                                                                                                                                                             |
| CBS2499v2 CBS2499_3650 | protein 16                                                                                                                                                                                                                                                                                                                             |
| AWRIv2 AWRI_1774       | protein 16                                                                                                                                                                                                                                                                                                                             |
|                        | reductase, part of the dTTP biosynthetic pathway, involved in folate metabolism, possibly required for mitochondrial function                                                                                                                                                                                                          |
| LAMAP LAMAP2480_11147  | reductase involved in tetrahydrofolate biosynthesis; required for respiratory metabolism                                                                                                                                                                                                                                               |
| CBS2499v2 CBS2499_3234 | reductase involved in tetrahydrofolate biosynthesis; required for respiratory metabolism                                                                                                                                                                                                                                               |
| AWRIv2 AWRI_1949       | activator HAC1                                                                                                                                                                                                                                                                                                                         |
| LAMAP LAMAP2480_11165  | activator HAC1                                                                                                                                                                                                                                                                                                                         |
| CBS2499v2 CBS2499_4799 | activator HAC1                                                                                                                                                                                                                                                                                                                         |
| AWRIv2 AWRI_1012       | phospholipase C                                                                                                                                                                                                                                                                                                                        |
| LAMAP LAMAP2480_11174  | phospholipase C                                                                                                                                                                                                                                                                                                                        |
| CBS2499v2 CBS2499_2860 | phospholipase C                                                                                                                                                                                                                                                                                                                        |
| AWRIv2 AWRI_2930       | shifted protein                                                                                                                                                                                                                                                                                                                        |
| LAMAP LAMAP2480_11311  | shifted protein                                                                                                                                                                                                                                                                                                                        |
| CBS2499v2 CBS2499_3409 | shifted protein                                                                                                                                                                                                                                                                                                                        |
| AWRIv2 AWRI_3503       | deacetylase 1                                                                                                                                                                                                                                                                                                                          |
| LAMAP LAMAP2480_11318  | deacetylase 1                                                                                                                                                                                                                                                                                                                          |
| CBS2499v2 CBS2499_4597 | deacetylase 1                                                                                                                                                                                                                                                                                                                          |
| AWRIv2 AWRI_1097       | involved in transcription initiation at TATA-containing promoters; associates with the basal transcription factor TFIID; contains two bromodomains; corresponds to the C-terminal region of mammalian TAF1; redundant with Bdf2p                                                                                                       |
| LAMAP LAMAP2480_11336  |                                                                                                                                                                                                                                                                                                                                        |
|                        | involved in transcription initiation; functions at TATA-containing promoters; associates with the basal transcription factor TFIID; contains two bromodomains; corresponds to the C-terminal region of mammalian TAF1; redundant with Bdf2p; BDF1 has a paralog, BDF2, that arose from the whole genome duplication                    |
| CBS2499v2 CBS2499_4126 |                                                                                                                                                                                                                                                                                                                                        |

|                        |                                                                                                                                                                                                                                                                                                                                                                                |
|------------------------|--------------------------------------------------------------------------------------------------------------------------------------------------------------------------------------------------------------------------------------------------------------------------------------------------------------------------------------------------------------------------------|
| AWRIv2 AWRI_4103       | involved in transcription initiation; functions at TATA-containing promoters; associates with the basal transcription factor TFIID; contains two bromodomains; corresponds to the C-terminal region of mammalian TAF1; redundant with Bdf2p; BDF1 has a paralog, BDF2, that arose from the whole genome duplication                                                            |
| LAMAP LAMAP2480_11457  | of the septin ring of the mother-bud neck that is required for cytokinesis; septins recruit proteins to the neck and can act as a barrier to diffusion at the membrane, and they comprise the 10nm filaments seen with EM                                                                                                                                                      |
| CBS2499v2 CBS2499_3119 | of the septin ring that is required for cytokinesis; septins are GTP-binding proteins that assemble into rod-like hetero-oligomers that can associate with other rods to form filaments; septin rings at the mother-bud neck act as scaffolds for recruiting cell division factors and as barriers to prevent diffusion of specific proteins between mother and daughter cells |
| AWRIv2 AWRI_3748       | of the septin ring that is required for cytokinesis; septins are GTP-binding proteins that assemble into rod-like hetero-oligomers that can associate with other rods to form filaments; septin rings at the mother-bud neck act as scaffolds for recruiting cell division factors and as barriers to prevent diffusion of specific proteins between mother and daughter cells |
| LAMAP LAMAP2480_11474  | subunit (19 kDa), involved in RNA polymerase II transcription initiation, similar to histone H4 with atypical histone fold motif of Spt3-like transcription factors                                                                                                                                                                                                            |
| CBS2499v2 CBS2499_3161 | initiation factor TFIID subunit 13                                                                                                                                                                                                                                                                                                                                             |
| AWRIv2 AWRI_3561       | initiation factor TFIID subunit 13                                                                                                                                                                                                                                                                                                                                             |
| LAMAP LAMAP2480_11483  | protein _1406                                                                                                                                                                                                                                                                                                                                                                  |
| CBS2499v2 CBS2499_3714 | protein _1406                                                                                                                                                                                                                                                                                                                                                                  |
| AWRIv2 AWRI_1173       | protein _1406                                                                                                                                                                                                                                                                                                                                                                  |
| LAMAP LAMAP2480_11519  | protein                                                                                                                                                                                                                                                                                                                                                                        |
| CBS2499v2 CBS2499_2654 | protein                                                                                                                                                                                                                                                                                                                                                                        |
| AWRIv2 AWRI_0462       | protein                                                                                                                                                                                                                                                                                                                                                                        |
| LAMAP LAMAP2480_11530  | of the mitochondrial inner membrane, involved in turnover of membrane-embedded proteins; member of a family of predicted membrane-bound metalloproteases in prokaryotes and higher eukaryotes                                                                                                                                                                                  |
| CBS2499v2 CBS2499_1891 | metalloendopeptidase OMA1                                                                                                                                                                                                                                                                                                                                                      |
| AWRIv2 AWRI_3992       | metalloendopeptidase OMA1                                                                                                                                                                                                                                                                                                                                                      |
| LAMAP LAMAP2480_11598  | protein _3253                                                                                                                                                                                                                                                                                                                                                                  |
| CBS2499v2 CBS2499_3604 | protein _3253                                                                                                                                                                                                                                                                                                                                                                  |
| AWRIv2 AWRI_2701       | protein _3253                                                                                                                                                                                                                                                                                                                                                                  |
| LAMAP LAMAP2480_11611  | protein _0863                                                                                                                                                                                                                                                                                                                                                                  |
| CBS2499v2 CBS2499_0987 | protein _0863                                                                                                                                                                                                                                                                                                                                                                  |
| AWRIv2 AWRI_0705       | protein _0863                                                                                                                                                                                                                                                                                                                                                                  |
| LAMAP LAMAP2480_11649  | aminotransferase C660.12c                                                                                                                                                                                                                                                                                                                                                      |
| CBS2499v2 CBS2499_4721 | sulfoxide lyase                                                                                                                                                                                                                                                                                                                                                                |
| AWRIv2 AWRI_2431       | sulfoxide lyase                                                                                                                                                                                                                                                                                                                                                                |
| LAMAP LAMAP2480_11729  | dioxygenase                                                                                                                                                                                                                                                                                                                                                                    |
| CBS2499v2 CBS2499_2690 | dioxygenase CDG1                                                                                                                                                                                                                                                                                                                                                               |
| AWRIv2 AWRI_0427       | dioxygenase CDG1                                                                                                                                                                                                                                                                                                                                                               |
| LAMAP LAMAP2480_11738  | methyltransferase subunit                                                                                                                                                                                                                                                                                                                                                      |
| CBS2499v2 CBS2499_2717 | methyltransferase subunit                                                                                                                                                                                                                                                                                                                                                      |

|                        |                                                                                                                                                                                                                                                                                                                                                                                                                                                                |
|------------------------|----------------------------------------------------------------------------------------------------------------------------------------------------------------------------------------------------------------------------------------------------------------------------------------------------------------------------------------------------------------------------------------------------------------------------------------------------------------|
| AWRIv2 AWRI_0398       | methyltransferase subunit                                                                                                                                                                                                                                                                                                                                                                                                                                      |
| LAMAP LAMAP2480_11912  | up-regulated gene 14 protein                                                                                                                                                                                                                                                                                                                                                                                                                                   |
| CBS2499v2 CBS2499_2779 | up-regulated gene 14 protein                                                                                                                                                                                                                                                                                                                                                                                                                                   |
| AWRIv2 AWRI_0333       | 4-epimerase                                                                                                                                                                                                                                                                                                                                                                                                                                                    |
| LAMAP LAMAP2480_11956  | acidic ribosomal protein P1-alpha                                                                                                                                                                                                                                                                                                                                                                                                                              |
| CBS2499v2 CBS2499_2135 | acidic ribosomal protein P1-alpha                                                                                                                                                                                                                                                                                                                                                                                                                              |
| AWRIv2 AWRI_0872       | acidic ribosomal protein P1-alpha                                                                                                                                                                                                                                                                                                                                                                                                                              |
| LAMAP LAMAP2480_11990  | (Like Sm) protein; forms heteroheptameric complex (with Lsm2p, Lsm3p, Lsm4p, Lsm5p, Lsm6p, and Lsm7p)<br>involved in degradation of cytoplasmic mRNAs                                                                                                                                                                                                                                                                                                          |
| CBS2499v2 CBS2499_2719 | (Like Sm) protein; forms heteroheptameric complex (with Lsm2p, Lsm3p, Lsm4p, Lsm5p, Lsm6p, and Lsm7p)<br>involved in degradation of cytoplasmic mRNAs; also enters the nucleus and positively regulates transcription initiation; unlike most Sm-like proteins, Lsm1p requires both its SM-domain and C-terminal domain for RNA-binding; binds to mRNAs under glucose starvation, most often in the 3' UTR; forms cytoplasmic foci upon DNA replication stress |
| AWRIv2 AWRI_0396       | (Like Sm) protein; forms heteroheptameric complex (with Lsm2p, Lsm3p, Lsm4p, Lsm5p, Lsm6p, and Lsm7p)<br>involved in degradation of cytoplasmic mRNAs; also enters the nucleus and positively regulates transcription initiation; unlike most Sm-like proteins, Lsm1p requires both its SM-domain and C-terminal domain for RNA-binding; binds to mRNAs under glucose starvation, most often in the 3' UTR; forms cytoplasmic foci upon DNA replication stress |
| LAMAP LAMAP2480_12039  | of the TOM (translocase of outer membrane) complex responsible for recognition and initial import steps for all mitochondrially directed proteins; acts as a receptor for incoming precursor proteins                                                                                                                                                                                                                                                          |
| CBS2499v2 CBS2499_3393 | of the TOM (translocase of outer membrane) complex; responsible for recognition and initial import steps for all mitochondrially directed proteins; acts as a receptor for incoming precursor proteins                                                                                                                                                                                                                                                         |
| AWRIv2 AWRI_3488       | of the TOM (translocase of outer membrane) complex; responsible for recognition and initial import steps for all mitochondrially directed proteins; acts as a receptor for incoming precursor proteins                                                                                                                                                                                                                                                         |
