# Supplementary material
Source: publisher figshare collection journal article supplement (https://karger.figshare.com/articles/dataset/_/5091934)

# Glycolysis LAMAP2480

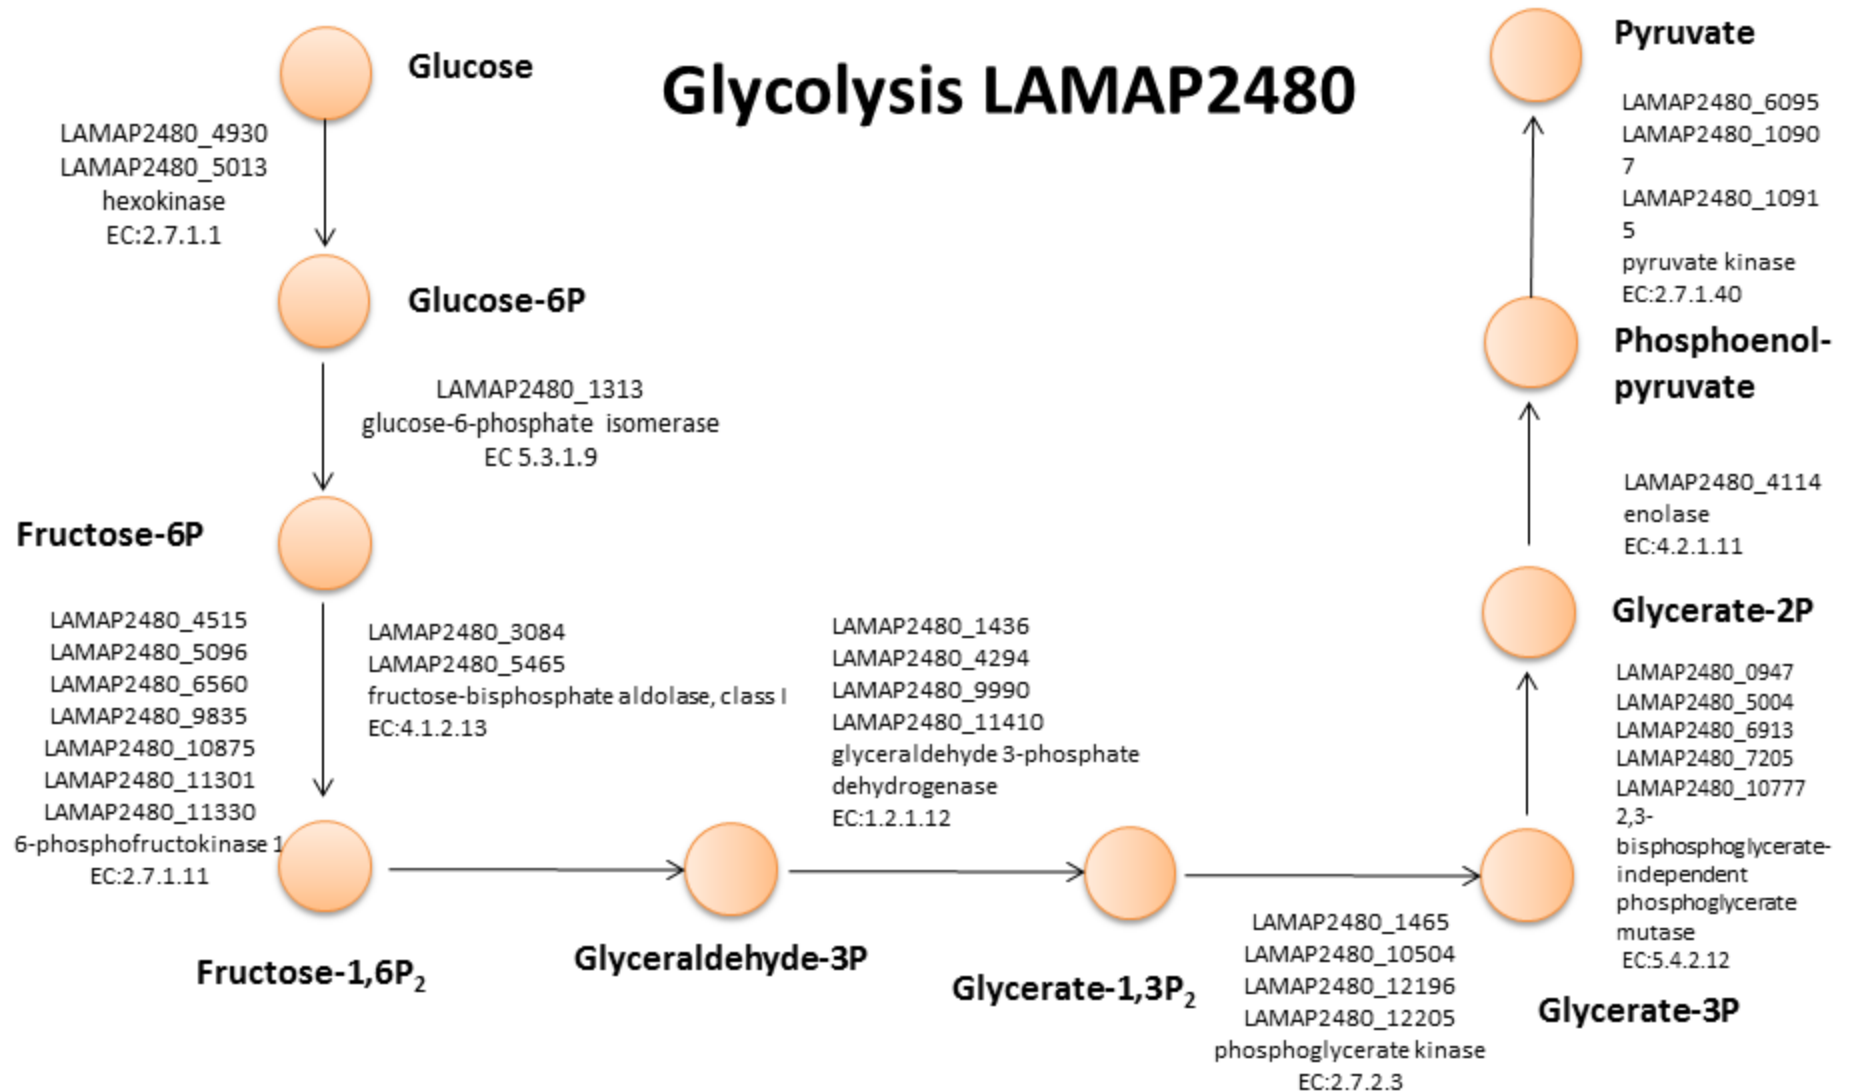

Supplement: Supplementary file 2 [file 1]

***Saccharomyces cerevisiae***

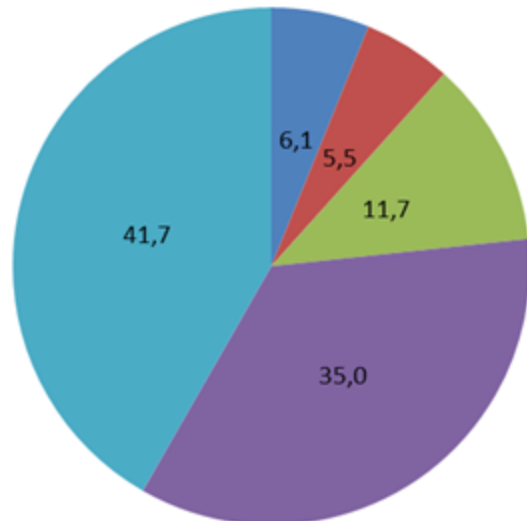

**AWRI1499**

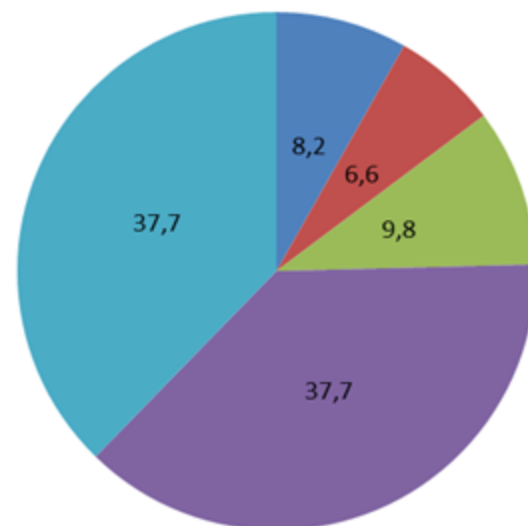

**LAMAP2480**

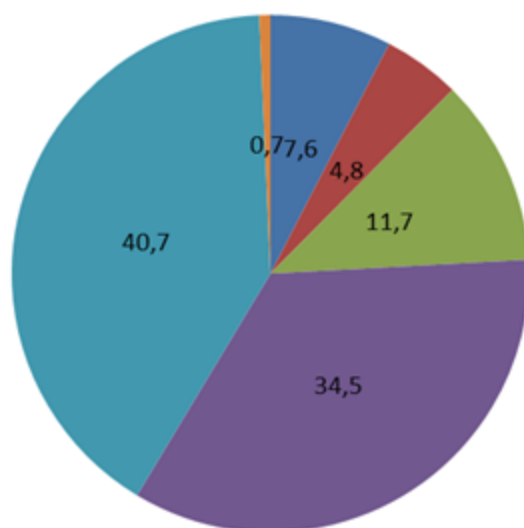

**CBS2499**

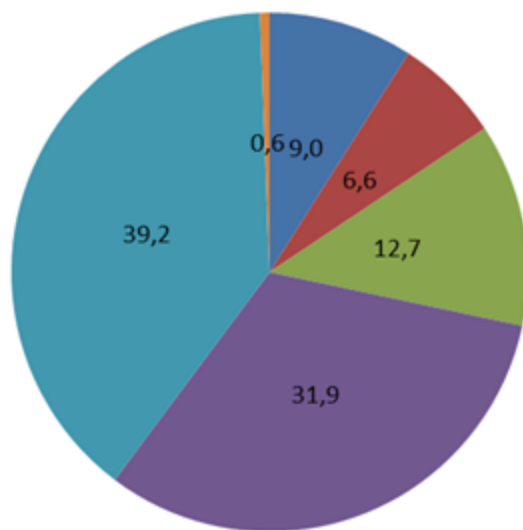

***Pichia pastoris***

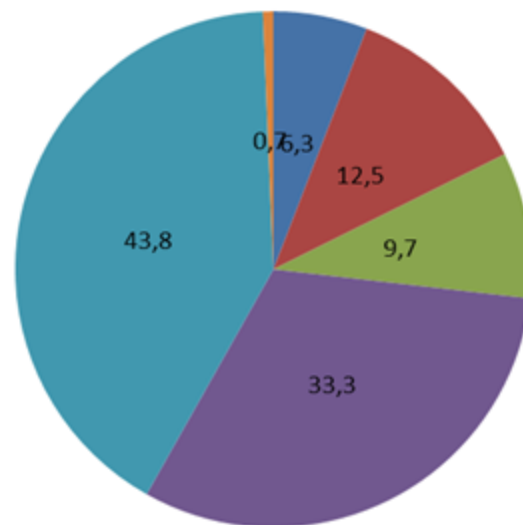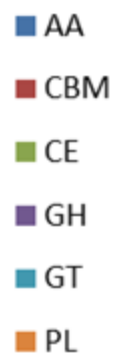

Supplement: Supplementary file 4 [file 1]
